# Supplementary material
Source: publisher figshare collection journal article supplement (https://tandf.figshare.com/articles/dataset/_/4955363)
Supplement: Supplementary file 2 [file 1]

Archive with 2 entries (2 files):
- thsj_a_1324974_sm9173.xlsx
- thsj_a_1324974_sm9158.pdf
