# Supplementary material
Source: publisher figshare collection journal article supplement (https://tandf.figshare.com/articles/dataset/_/4955363)
Supplement: Supplementary file 2 [file 1 › thsj_a_1324974_sm9173.xlsx]

## Sheet: 00 Readme
Supplementary Information for
Re-calibration of Arctic sea ice extent datasets using Arctic surface air temperature records
Ronan Connolly, Michael Connolly and Willie Soon
Last updated:	25th August 2016
This Excel workbook contains the following sheets
00 Readme
01 All Arctic recons
02 North American recons
03 Nordic recons
04 Siberian recons
05 Satellite - original
06 Satellite - rescaled
07 Walsh - original
08 Walsh - rescaled
09 AARI - original
10 AARI look-up table
11 Siberian - rescaled (AARI)
12 N. American temperatures
13 Nordic temperatures
14 Siberian temperatures
15 N. American - T-based
16 Nordic - T-based
17 Siberian - T-based
18 Other summer reconstructions
19 means & SDs

## Sheet: 01 All Arctic recons
																											T-based CI - unadjusted
							Upper bound						Lower bound														All Arctic, sea ice extent (million km2)													Upper bound						Lower bound
Rescaled (unadjusted T)							Rescaled (unadjusted T)						Rescaled (unadjusted T)																				Rescaled (MW09-adjusted T)							Rescaled (unadjusted T)						Rescaled (unadjusted T)
All Arctic, sea ice extent (million km2)							All Arctic, sea ice extent (million km2)						All Arctic, sea ice extent (million km2)													Year	winter	spring	summer	autumn	annual		All Arctic, sea ice extent (million km2)							All Arctic, sea ice extent (million km2)						All Arctic, sea ice extent (million km2)
Year	Winter	Spring	Summer	Autumn	Annual		Winter	Spring	Summer	Autumn	Annual		Winter	Spring	Summer	Autumn	Annual																Year	Winter	Spring	Summer	Autumn	Annual		Winter	Spring	Summer	Autumn	Annual		Winter	Spring	Summer	Autumn
1901	12944000	12576000	8614000	12401000	11634000		13279000	12921000	9713000	13053000	12233000		12609000	12231000	7515000	11749000	11035000									1901	335000	345000	1099000	652000	599000		1901	12986000	12647000	8950000	12453000	11759000		13332000	12988000	10062000	13089000	12332000		12640000	12306000	7838000	11817000
1902	13272000	12856000	7999000	12775000	11726000		13605000	13186000	9020000	13382000	12230000		12939000	12526000	6978000	12168000	11222000									1902	333000	330000	1021000	607000	504000		1902	13296000	12943000	8437000	12728000	11851000		13636000	13269000	9446000	13316000	12379000		12956000	12617000	7428000	12140000
1903	12768000	12680000	8251000	11911000	11403000		13096000	13009000	9334000	12576000	11971000		12440000	12351000	7168000	11246000	10835000									1903	328000	329000	1083000	665000	568000		1903	12819000	12757000	8588000	12045000	11552000		13152000	13086000	9671000	12693000	12126000		12486000	12428000	7505000	11397000
1904	12705000	12378000	8157000	11963000	11301000		13037000	12713000	9486000	12808000	11854000		12373000	12043000	6828000	11118000	10748000									1904	332000	335000	1329000	845000	553000		1904	12759000	12436000	8429000	12088000	11428000		13097000	12767000	9768000	12921000	12021000		12421000	12105000	7090000	11255000
1905	13096000	12649000	7906000	11838000	11372000		13460000	12988000	9218000	12572000	11908000		12732000	12310000	6594000	11104000	10836000									1905	364000	339000	1312000	734000	536000		1905	13129000	12722000	8400000	11862000	11528000		13500000	13056000	9544000	12603000	12177000		12758000	12388000	7256000	11121000
1906	12881000	12673000	8788000	12130000	11618000		13244000	13008000	9919000	12885000	12217000		12518000	12338000	7657000	11375000	11019000									1906	363000	335000	1131000	755000	599000		1906	12926000	12751000	8875000	12331000	11721000		13296000	13086000	10181000	13050000	12392000		12556000	12416000	7569000	11612000
1907	13095000	12613000	8000000	12109000	11454000		13431000	12945000	9409000	12955000	12132000		12759000	12281000	6591000	11263000	10776000									1907	336000	332000	1409000	846000	678000		1907	13136000	12686000	8745000	12125000	11673000		13478000	13016000	10010000	12960000	12245000		12794000	12356000	7480000	11290000
1908	12856000	12617000	8048000	12085000	11402000		13209000	12936000	9170000	12692000	11946000		12503000	12298000	6926000	11478000	10858000									1908	353000	319000	1122000	607000	544000		1908	12902000	12690000	8806000	12214000	11653000		13269000	13026000	10160000	12807000	12347000		12535000	12354000	7452000	11621000
1909	12949000	12758000	8403000	12223000	11583000		13307000	13077000	9532000	12826000	12213000		12591000	12439000	7274000	11620000	10953000									1909	358000	319000	1129000	603000	630000		1909	12992000	12840000	8517000	12360000	11677000		13362000	13172000	9543000	12951000	12223000		12622000	12508000	7491000	11769000
1910	12788000	12548000	8171000	12167000	11419000		13107000	12856000	9231000	12778000	11928000		12469000	12240000	7111000	11556000	10910000									1910	319000	308000	1060000	611000	509000		1910	12837000	12616000	8642000	12235000	11583000		13164000	12921000	9754000	12829000	12094000		12510000	12311000	7530000	11641000
1911	13482000	12990000	8200000	11532000	11551000		13815000	13339000	9333000	12118000	12067000		13149000	12641000	7067000	10946000	11035000									1911	333000	349000	1133000	586000	516000		1911	13500000	13089000	8942000	11681000	11803000		13844000	13434000	10574000	12264000	12427000		13156000	12744000	7310000	11098000
1912	13301000	13042000	9396000	11944000	11921000		13611000	13337000	11109000	12546000	12501000		12991000	12747000	7683000	11342000	11341000									1912	310000	295000	1713000	602000	580000		1912	13327000	13145000	8832000	11975000	11820000		13647000	13451000	10000000	12543000	12318000		13007000	12839000	7664000	11407000
1913	12793000	12742000	8684000	12039000	11565000		13110000	13031000	9960000	12647000	12111000		12476000	12453000	7408000	11431000	11019000									1913	317000	289000	1276000	608000	546000		1913	12843000	12823000	9929000	12181000	11944000		13165000	13129000	11069000	12789000	12561000		12521000	12517000	8789000	11573000
1914	13110000	12763000	8867000	11472000	11553000		13430000	13051000	10147000	12082000	12179000		12790000	12475000	7587000	10862000	10927000									1914	320000	288000	1280000	610000	626000		1914	13148000	12849000	8957000	11558000	11628000		13475000	13154000	10037000	12122000	12168000		12821000	12544000	7877000	10994000
1915	12734000	12713000	7984000	12513000	11486000		13045000	13008000	9088000	13100000	11981000		12423000	12418000	6880000	11926000	10991000									1915	311000	295000	1104000	587000	495000		1915	12790000	12794000	9293000	12460000	11834000		13111000	13099000	10366000	13032000	12357000		12469000	12489000	8220000	11888000
1916	12881000	12850000	9094000	12083000	11727000		13194000	13126000	10202000	12692000	12253000		12568000	12574000	7986000	11474000	11201000									1916	313000	276000	1108000	609000	526000		1916	12926000	12936000	9294000	12162000	11830000		13246000	13233000	10297000	12755000	12315000		12606000	12639000	8291000	11569000
1917	13608000	13155000	8681000	13031000	12119000		13933000	13447000	9667000	13610000	12594000		13283000	12863000	7695000	12452000	11644000									1917	325000	292000	986000	579000	475000		1917	13619000	13267000	9356000	13199000	12360000		13957000	13582000	10307000	13796000	12863000		13281000	12952000	8405000	12602000
1918	13189000	13098000	8801000	11988000	11769000		13496000	13376000	9736000	12523000	12228000		12882000	12820000	7866000	11453000	11310000									1918	307000	278000	935000	535000	459000		1918	13219000	13201000	9598000	12076000	12024000		13559000	13488000	10513000	12593000	12506000		12879000	12914000	8683000	11559000
1919	12861000	12773000	9116000	12360000	11778000		13166000	13060000	10033000	12879000	12226000		12556000	12486000	8199000	11841000	11330000									1919	305000	287000	917000	519000	448000		1919	12909000	12859000	9225000	12519000	11878000		13225000	13156000	10175000	13043000	12391000		12593000	12562000	8275000	11995000
1920	12846000	12525000	8875000	11862000	11527000		13144000	12805000	9889000	12427000	12044000		12548000	12245000	7861000	11297000	11010000									1920	298000	280000	1014000	565000	517000		1920	12897000	12594000	9723000	11914000	11782000		13205000	12884000	10642000	12446000	12247000		12589000	12304000	8804000	11382000
1921	12812000	12555000	8824000	11947000	11535000		13090000	12820000	9832000	12484000	11981000		12534000	12290000	7816000	11410000	11089000									1921	278000	265000	1008000	537000	446000		1921	12861000	12627000	8962000	12153000	11651000		13160000	12917000	9864000	12673000	12096000		12562000	12337000	8060000	11633000
1922	12993000	12590000	8131000	11666000	11345000		13274000	12844000	9046000	12169000	11777000		12712000	12336000	7216000	11163000	10913000									1922	281000	254000	915000	503000	432000		1922	13034000	12663000	9286000	11752000	11684000		13333000	12939000	10187000	12249000	12115000		12735000	12387000	8385000	11255000
1923	12700000	12589000	8481000	11574000	11336000		12977000	12830000	9369000	12063000	11749000		12423000	12348000	7593000	11085000	10923000									1923	277000	241000	888000	489000	413000		1923	12753000	12658000	8731000	11693000	11459000		13047000	12918000	9601000	12171000	11892000		12459000	12398000	7861000	11215000
1924	12797000	12452000	8658000	11564000	11368000		13069000	12699000	9596000	12057000	11792000		12525000	12205000	7720000	11071000	10944000									1924	272000	247000	938000	493000	424000		1924	12849000	12517000	8443000	11754000	11391000		13124000	12772000	9379000	12231000	11811000		12574000	12262000	7507000	11277000
1925	12661000	12151000	8787000	11824000	11356000		12943000	12393000	9759000	12325000	11773000		12379000	11909000	7815000	11323000	10939000									1925	282000	242000	972000	501000	417000		1925	12718000	12195000	9171000	11842000	11482000		13002000	12443000	10052000	12326000	11900000		12434000	11947000	8290000	11358000
1926	12749000	12466000	8962000	11798000	11494000		13026000	12707000	9876000	12292000	11913000		12472000	12225000	8048000	11304000	11075000									1926	277000	241000	914000	494000	419000		1926	12801000	12530000	9328000	11874000	11633000		13082000	12779000	10346000	12343000	12129000		12520000	12281000	8310000	11405000
1927	12700000	12609000	8844000	12407000	11640000		12981000	12850000	9907000	12891000	12149000		12419000	12368000	7781000	11923000	11131000									1927	281000	241000	1063000	484000	509000		1927	12753000	12684000	9136000	12557000	11783000		13037000	12933000	9945000	13040000	12196000		12469000	12435000	8327000	12074000
1928	12700000	12704000	9475000	11495000	11594000		12976000	12955000	10373000	11955000	12000000		12424000	12453000	8577000	11035000	11188000									1928	276000	251000	898000	460000	406000		1928	12753000	12783000	9241000	11533000	11578000		13051000	13064000	10074000	11989000	12000000		12455000	12502000	8408000	11077000
1929	13013000	12845000	9021000	11411000	11573000		13283000	13086000	9879000	11882000	11969000		12743000	12604000	8163000	10940000	11177000									1929	270000	241000	858000	471000	396000		1929	13052000	12933000	9513000	11511000	11752000		13347000	13198000	10186000	11960000	12143000		12757000	12668000	8840000	11062000
1930	12612000	12459000	8962000	11801000	11459000		12883000	12699000	9698000	12236000	11840000		12341000	12219000	8226000	11366000	11078000									1930	271000	240000	736000	435000	381000		1930	12670000	12523000	9441000	11878000	11628000		12942000	12771000	10148000	12308000	12003000		12398000	12275000	8734000	11448000
1931	12656000	12233000	8667000	11421000	11244000		12912000	12459000	9366000	11860000	11592000		12400000	12007000	7968000	10982000	10896000									1931	256000	226000	699000	439000	348000		1931	12711000	12281000	9088000	11523000	11401000		12991000	12528000	9773000	11963000	11773000		12431000	12034000	8403000	11083000
1932	12700000	12613000	8100000	12060000	11368000		12966000	12852000	8855000	12478000	11737000		12434000	12374000	7345000	11642000	10999000									1932	266000	239000	755000	418000	369000		1932	12753000	12687000	9177000	12096000	11678000		13043000	12931000	9872000	12499000	12058000		12463000	12443000	8482000	11693000
1933	12636000	12217000	8903000	12368000	11531000		12891000	12437000	9622000	12768000	11875000		12381000	11997000	8184000	11968000	11187000									1933	255000	220000	719000	400000	344000		1933	12694000	12265000	8676000	12456000	11523000		12950000	12498000	9307000	12839000	11872000		12438000	12032000	8045000	12073000
1934	13857000	12905000	9476000	11351000	11897000		14113000	13128000	10123000	11765000	12246000		13601000	12682000	8829000	10937000	11548000									1934	256000	223000	647000	414000	349000		1934	13858000	12998000	9714000	11457000	12007000		14116000	13234000	10345000	11858000	12342000		13600000	12762000	9083000	11056000
1935	13183000	12643000	8716000	11854000	11599000		13436000	12863000	9354000	12259000	11928000		12930000	12423000	8078000	11449000	11270000									1935	253000	220000	638000	405000	329000		1935	13220000	12721000	9151000	11877000	11742000		13475000	12946000	9771000	12267000	12075000		12965000	12496000	8531000	11487000
1936	12875000	12627000	8633000	11672000	11452000		13126000	12848000	9277000	12067000	11789000		12624000	12406000	7989000	11277000	11115000									1936	251000	221000	644000	395000	337000		1936	12927000	12704000	8721000	11761000	11528000		13180000	12931000	9289000	12136000	11845000		12674000	12477000	8153000	11386000
1937	12890000	12509000	8964000	11534000	11474000		13145000	12739000	9547000	11929000	11792000		12635000	12279000	8381000	11139000	11156000									1937	255000	230000	583000	395000	318000		1937	12939000	12575000	9392000	11656000	11641000		13197000	12811000	9980000	12046000	11969000		12681000	12339000	8804000	11266000
1938	12998000	12611000	8635000	11371000	11404000		13259000	12839000	9225000	11769000	11711000		12737000	12383000	8045000	10973000	11097000									1938	261000	228000	590000	398000	307000		1938	13040000	12687000	8913000	11411000	11513000		13306000	12923000	9513000	11805000	11826000		12774000	12451000	8313000	11017000
1939	12870000	12433000	8707000	11572000	11396000		13127000	12659000	9274000	11980000	11699000		12613000	12207000	8140000	11164000	11093000									1939	257000	226000	567000	408000	303000		1939	12921000	12496000	8996000	11665000	11520000		13182000	12730000	9540000	12074000	11838000		12660000	12262000	8452000	11256000
1940	13176000	12615000	8119000	11847000	11439000		13432000	12842000	8688000	12246000	11742000		12920000	12388000	7550000	11448000	11136000									1940	256000	227000	569000	399000	303000		1940	13283000	12713000	8381000	11839000	11554000		13560000	12964000	8966000	12244000	11884000		13006000	12462000	7796000	11434000
1941	13259000	12920000	8129000	12234000	11636000		13513000	13151000	8686000	12614000	11937000		13005000	12689000	7572000	11854000	11335000									1941	254000	231000	557000	380000	301000		1941	13347000	13004000	8546000	12273000	11793000		13624000	13261000	9100000	12640000	12108000		13070000	12747000	7992000	11906000
1942	13154000	12667000	8464000	12035000	11580000		13406000	12896000	9008000	12395000	11890000		12902000	12438000	7920000	11675000	11270000									1942	252000	229000	544000	360000	310000		1942	13222000	12644000	8309000	12090000	11566000		13471000	12900000	8857000	12459000	11894000		12973000	12388000	7761000	11721000
1943	12803000	12445000	8036000	11063000	11087000		13042000	12662000	8569000	11424000	11376000		12564000	12228000	7503000	10702000	10798000									1943	239000	217000	533000	361000	289000		1943	12769000	12405000	8591000	11063000	11207000		13036000	12638000	9114000	11421000	11514000		12502000	12172000	8068000	10705000
1944	12529000	12780000	8649000	11386000	11336000		12768000	12997000	9162000	11752000	11617000		12290000	12563000	8136000	11020000	11055000									1944	239000	217000	513000	366000	281000		1944	12527000	12800000	8177000	11363000	11217000		12776000	13031000	8699000	11723000	11506000		12278000	12569000	7655000	11003000
1945	12714000	12707000	8376000	12063000	11465000		12956000	12922000	8914000	12412000	11738000		12472000	12492000	7838000	11714000	11192000									1945	242000	215000	538000	349000	273000		1945	12745000	12749000	8848000	12149000	11623000		12993000	12970000	9348000	12488000	11904000		12497000	12528000	8348000	11810000
1946	12814000	12559000	8851000	11789000	11503000		13055000	12774000	9364000	12135000	11770000		12573000	12344000	8338000	11443000	11236000									1946	241000	215000	513000	346000	267000		1946	12827000	12582000	8650000	11749000	11452000		13063000	12804000	9147000	12083000	11721000		12591000	12360000	8153000	11415000
1947	12758000	12276000	8297000	11403000	11184000		13000000	12493000	8824000	11748000	11457000		12516000	12059000	7770000	11058000	10911000									1947	242000	217000	527000	345000	273000		1947	12768000	12301000	8606000	11428000	11276000		13005000	12524000	9090000	11760000	11543000		12531000	12078000	8122000	11096000
1948	12910000	12659000	8099000	11919000	11397000		13157000	12874000	8593000	12244000	11665000		12663000	12444000	7605000	11594000	11129000									1948	247000	215000	494000	325000	268000		1948	12931000	12680000	8060000	11916000	11397000		13176000	12898000	8539000	12244000	11665000		12686000	12462000	7581000	11588000
1949	12955000	12847000	8747000	11725000	11569000		13172000	13039000	9219000	12040000	11813000		12738000	12655000	8275000	11410000	11325000									1949	217000	192000	472000	315000	244000		1949	12978000	12870000	8752000	11715000	11579000		13201000	13077000	9219000	12027000	11832000		12755000	12663000	8285000	11403000
1950	12951000	12604000	8865000	11760000	11545000		13173000	12797000	9340000	12072000	11800000		12729000	12411000	8390000	11448000	11290000									1950	222000	193000	475000	312000	255000		1950	12975000	12627000	9090000	11777000	11617000		13205000	12833000	9545000	12086000	11881000		12745000	12421000	8635000	11468000
1951	12748000	12689000	8107000	12034000	11395000		12942000	12860000	8571000	12328000	11631000		12554000	12518000	7643000	11740000	11159000									1951	194000	171000	464000	294000	236000		1951	12755000	12712000	8269000	12073000	11452000		12953000	12894000	8702000	12355000	11689000		12557000	12530000	7836000	11791000
1952	13280000	12664000	8117000	12213000	11569000		13474000	12836000	8567000	12493000	11793000		13086000	12492000	7667000	11933000	11345000									1952	194000	172000	450000	280000	224000		1952	13331000	12687000	8534000	12276000	11707000		13521000	12861000	8957000	12545000	11929000		13141000	12513000	8111000	12007000
1953	12939000	12732000	8308000	11726000	11426000		13129000	12901000	8751000	12006000	11649000		12749000	12563000	7865000	11446000	11203000									1953	190000	169000	443000	280000	223000		1953	12947000	12751000	8031000	11679000	11352000		13133000	12922000	8464000	11951000	11582000		12761000	12580000	7598000	11407000
1954	12798000	12855000	8289000	11772000	11429000		12989000	13023000	8745000	12052000	11655000		12607000	12687000	7833000	11492000	11203000									1954	191000	168000	456000	280000	226000		1954	12807000	12868000	7787000	11756000	11305000		12993000	13040000	8215000	12025000	11530000		12621000	12696000	7359000	11487000
1955	12882000	12925000	8266000	11600000	11418000		13073000	13093000	8710000	11880000	11644000		12691000	12757000	7822000	11320000	11192000									1955	191000	168000	444000	280000	226000		1955	12890000	12934000	8073000	11565000	11366000		13077000	13106000	8499000	11832000	11588000		12703000	12762000	7647000	11298000
1956	12802000	12737000	8767000	11971000	11569000		12992000	12906000	9217000	12248000	11791000		12612000	12568000	8317000	11694000	11347000									1956	190000	169000	450000	277000	222000		1956	12811000	12753000	8273000	11939000	11444000		12997000	12925000	8699000	12207000	11665000		12625000	12581000	7847000	11671000
1957	12672000	12629000	8690000	12009000	11500000		12862000	12799000	9123000	12279000	11724000		12482000	12459000	8257000	11739000	11276000									1957	190000	170000	433000	270000	224000		1957	12678000	12656000	8554000	12002000	11473000		12864000	12828000	8972000	12266000	11697000		12492000	12484000	8136000	11738000
1958	12824000	12530000	8349000	11948000	11413000		13013000	12696000	8777000	12208000	11635000		12635000	12364000	7921000	11688000	11191000									1958	189000	166000	428000	260000	222000		1958	12830000	12564000	7956000	11911000	11315000		13016000	12732000	8367000	12161000	11534000		12644000	12396000	7545000	11661000
1959	12910000	12747000	8444000	11893000	11499000		13096000	12912000	8866000	12151000	11716000		12724000	12582000	8022000	11635000	11282000									1959	186000	165000	422000	258000	217000		1959	12918000	12769000	8638000	11944000	11567000		13100000	12937000	9040000	12189000	11782000		12736000	12601000	8236000	11699000
1960	12545000	12476000	7997000	11641000	11165000		12731000	12642000	8414000	11898000	11381000		12359000	12310000	7580000	11384000	10949000									1960	186000	166000	417000	257000	216000		1960	12555000	12514000	7708000	11618000	11099000		12737000	12681000	8107000	11862000	11310000		12373000	12347000	7309000	11374000
1961	12863000	12800000	8195000	11700000	11390000		13046000	12964000	8609000	11958000	11601000		12680000	12636000	7781000	11442000	11179000									1961	183000	164000	414000	258000	211000		1961	12873000	12812000	7854000	11661000	11300000		13054000	12988000	8254000	11909000	11516000		12692000	12636000	7454000	11413000
1962	12730000	12721000	8871000	11910000	11558000		12914000	12888000	9285000	12162000	11771000		12546000	12554000	8457000	11658000	11345000									1962	184000	167000	414000	252000	213000		1962	12737000	12740000	8161000	11848000	11372000		12921000	12912000	8562000	12089000	11584000		12553000	12568000	7760000	11607000
1963	13086000	12719000	9297000	11959000	11765000		13271000	12885000	9720000	12214000	11977000		12901000	12553000	8874000	11704000	11553000									1963	185000	166000	423000	255000	212000		1963	13099000	12739000	9109000	11939000	11722000		13284000	12932000	9518000	12209000	11955000		12914000	12546000	8700000	11669000
1964	12915000	12551000	8952000	11823000	11560000		13099000	12715000	9364000	12080000	11771000		12731000	12387000	8540000	11566000	11349000									1964	184000	164000	412000	257000	211000		1964	12922000	12586000	8895000	11806000	11552000		13133000	12776000	9299000	12064000	11780000		12711000	12396000	8491000	11548000
1965	12986000	12660000	8723000	11888000	11564000		13170000	12825000	9139000	12141000	11772000		12802000	12495000	8307000	11635000	11356000									1965	184000	165000	416000	253000	208000		1965	12997000	12682000	8731000	11932000	11586000		13198000	12848000	9124000	12181000	11817000		12796000	12516000	8338000	11683000
1966	13391000	12843000	8559000	12225000	11755000		13574000	13008000	8972000	12478000	11963000		13208000	12678000	8146000	11972000	11547000									1966	183000	165000	413000	253000	208000		1966	13400000	12853000	7997000	12097000	11587000		13597000	13036000	8394000	12354000	11806000		13203000	12670000	7600000	11840000
1967	13052000	12573000	9007000	12306000	11735000		13236000	12738000	9420000	12558000	11946000		12868000	12408000	8594000	12054000	11524000									1967	184000	165000	413000	252000	211000		1967	13058000	12610000	8839000	12300000	11702000		13255000	12786000	9229000	12540000	11919000		12861000	12434000	8449000	12060000
1968	13433000	13077000	8101000	12390000	11750000		13620000	13242000	8509000	12639000	11960000		13246000	12912000	7693000	12141000	11540000									1968	187000	165000	408000	249000	210000		1968	13440000	13075000	8276000	12325000	11779000		13626000	13241000	8673000	12566000	11992000		13254000	12909000	7879000	12084000
1969	13637000	13237000	9291000	12264000	12107000		13824000	13401000	9699000	12515000	12318000		13450000	13073000	8883000	12013000	11896000									1969	187000	164000	408000	251000	211000		1969	13644000	13225000	8481000	12182000	11883000		13833000	13393000	8867000	12420000	12097000		13455000	13057000	8095000	11944000
1970	13221000	12577000	8892000	12070000	11690000		13408000	12743000	9298000	12324000	11902000		13034000	12411000	8486000	11816000	11478000									1970	187000	166000	406000	254000	212000		1970	13227000	12609000	8797000	12054000	11672000		13415000	12776000	9183000	12296000	11883000		13039000	12442000	8411000	11812000
1971	13091000	12744000	8552000	12608000	11749000		13276000	12911000	8960000	12865000	11961000		12906000	12577000	8144000	12351000	11537000									1971	185000	167000	408000	257000	212000		1971	13097000	12766000	8570000	12557000	11748000		13279000	12936000	8962000	12805000	11959000		12915000	12596000	8178000	12309000
1972	13133000	12908000	8807000	12106000	11739000		13317000	13075000	9216000	12361000	11947000		12949000	12741000	8398000	11851000	11531000									1972	184000	167000	409000	255000	208000		1972	13110000	12907000	8308000	12119000	11611000		13290000	13077000	8703000	12360000	11817000		12930000	12737000	7913000	11878000
1973	12875000	12594000	8416000	12189000	11519000		13060000	12760000	8824000	12441000	11729000		12690000	12428000	8008000	11937000	11309000									1973	185000	166000	408000	252000	210000		1973	12861000	12588000	8568000	12122000	11535000		13043000	12756000	8956000	12366000	11745000		12679000	12420000	8180000	11878000
1974	12489000	12641000	8541000	11956000	11407000		12675000	12807000	8947000	12209000	11614000		12303000	12475000	8135000	11703000	11200000									1974	186000	166000	406000	253000	207000		1974	12483000	12637000	8201000	11957000	11320000		12666000	12806000	8589000	12196000	11525000		12300000	12468000	7813000	11718000
1975	12855000	12500000	8484000	12324000	11541000		13040000	12674000	8894000	12578000	11754000		12670000	12326000	8074000	12070000	11328000									1975	185000	174000	410000	254000	213000		1975	12841000	12494000	8396000	12256000	11497000		13023000	12671000	8793000	12498000	11711000		12659000	12317000	7999000	12014000
1976	12843000	12577000	8494000	11844000	11440000		13036000	12744000	8902000	12096000	11653000		12650000	12410000	8086000	11592000	11227000									1976	193000	167000	408000	252000	213000		1976	12826000	12569000	8335000	11778000	11377000		13017000	12739000	8728000	12018000	11588000		12635000	12399000	7942000	11538000
1977	13189000	12986000	8581000	12054000	11703000		13384000	13156000	9002000	12308000	11933000		12994000	12816000	8160000	11800000	11473000									1977	195000	170000	421000	254000	230000		1977	13174000	12984000	8292000	11985000	11609000		13365000	13154000	8698000	12227000	11837000		12983000	12814000	7886000	11743000
1978	13017000	12998000	8904000	12247000	11792000		13206000	13168000	9317000	12505000	12004000		12828000	12828000	8491000	11989000	11580000									1978	189000	170000	413000	258000	212000		1978	13002000	12999000	8585000	12160000	11687000		13188000	13169000	8982000	12406000	11898000		12816000	12829000	8188000	11914000
1979	13192000	12925000	8837000	11862000	11704000	Satellite era	13384000	13098000	9254000	12124000	11917000		13000000	12752000	8420000	11600000	11491000								Satellite era	1979	192000	173000	417000	262000	213000		1979	13191000	12919000	8601000	11862000	11643000	Satellite era	13379000	13092000	8997000	12111000	11853000		13003000	12746000	8205000	11613000
1980	12896000	12681000	8838000	12190000	11651000		13088000	12853000	9258000	12466000	11874000		12704000	12509000	8418000	11914000	11428000									1980	192000	172000	420000	276000	223000		1980	12898000	12677000	8817000	12147000	11635000		13086000	12849000	9224000	12413000	11856000		12710000	12505000	8410000	11881000
1981	12965000	12963000	8620000	11928000	11619000		13186000	13160000	9052000	12224000	11863000		12744000	12766000	8188000	11632000	11375000									1981	221000	197000	432000	296000	244000		1981	12966000	12955000	8609000	11891000	11605000		13185000	13152000	9026000	12177000	11847000		12747000	12758000	8192000	11605000
1982	13198000	12869000	8890000	12151000	11777000		13433000	13055000	9325000	12436000	12020000		12963000	12683000	8455000	11866000	11534000									1982	235000	186000	435000	285000	243000		1982	13193000	12863000	8735000	12126000	11729000		13425000	13051000	9154000	12400000	11970000		12961000	12675000	8316000	11852000
1983	12879000	12611000	9000000	12173000	11666000		13103000	12797000	9434000	12453000	11904000		12655000	12425000	8566000	11893000	11428000									1983	224000	186000	434000	280000	238000		1983	12872000	12609000	8930000	12147000	11640000		13093000	12798000	9354000	12420000	11881000		12651000	12420000	8506000	11874000
1984	12743000	12540000	8573000	11791000	11412000		12969000	12738000	9008000	12077000	11659000		12517000	12342000	8138000	11505000	11165000									1984	226000	198000	435000	286000	247000		1984	12737000	12539000	8597000	11797000	11418000		12959000	12736000	9017000	12069000	11665000		12515000	12342000	8177000	11525000
1985	12779000	12775000	8406000	11785000	11436000		12991000	12959000	8841000	12070000	11678000		12567000	12591000	7971000	11500000	11194000									1985	212000	184000	435000	285000	242000		1985	12778000	12770000	8413000	11769000	11433000		12987000	12956000	8831000	12042000	11675000		12569000	12584000	7995000	11496000
1986	12937000	12823000	8732000	11991000	11621000		13148000	13009000	9163000	12274000	11855000		12726000	12637000	8301000	11708000	11387000									1986	211000	186000	431000	283000	234000		1986	12939000	12817000	8623000	11976000	11589000		13147000	13002000	9039000	12249000	11826000		12731000	12632000	8207000	11703000
1987	13003000	12841000	8253000	11144000	11310000		13210000	13021000	8687000	11428000	11543000		12796000	12661000	7819000	10860000	11077000									1987	207000	180000	434000	284000	233000		1987	13001000	12835000	8348000	11169000	11338000		13205000	13017000	8760000	11440000	11570000		12797000	12653000	7936000	10898000
1988	12969000	12830000	8554000	12251000	11651000		13176000	13018000	8990000	12541000	11897000		12762000	12642000	8118000	11961000	11405000									1988	207000	188000	436000	290000	246000		1988	12969000	12824000	8417000	12163000	11593000		13172000	13013000	8832000	12437000	11839000		12766000	12635000	8002000	11889000
1989	13032000	12541000	8564000	12051000	11547000		13248000	12729000	9003000	12345000	11794000		12816000	12353000	8125000	11757000	11300000									1989	216000	188000	439000	294000	247000		1989	13029000	12539000	8650000	12042000	11565000		13253000	12727000	9069000	12329000	11810000		12805000	12351000	8231000	11755000
1990	12855000	12553000	7901000	11942000	11313000		13092000	12767000	8408000	12304000	11596000		12618000	12339000	7394000	11580000	11030000									1990	237000	214000	507000	362000	283000		1990	12852000	12553000	8304000	11910000	11405000		13090000	12767000	8864000	12268000	11709000		12614000	12339000	7744000	11552000
1991	12749000	12564000	8195000	11918000	11357000		12974000	12758000	8780000	12245000	11647000		12524000	12370000	7610000	11591000	11067000									1991	225000	194000	585000	327000	290000		1991	12747000	12561000	7974000	11905000	11297000		12961000	12750000	8515000	12211000	11590000		12533000	12372000	7433000	11599000
1992	12751000	12459000	8879000	11949000	11510000		12966000	12651000	9461000	12271000	11807000		12536000	12267000	8297000	11627000	11213000									1992	215000	192000	582000	322000	297000		1992	12749000	12458000	8757000	11936000	11475000		12955000	12651000	9349000	12246000	11813000		12543000	12265000	8165000	11626000
1993	12807000	12606000	8165000	11988000	11392000		13020000	12798000	8815000	12309000	11753000		12594000	12414000	7515000	11667000	11031000									1993	213000	192000	650000	321000	361000		1993	12800000	12604000	8354000	11975000	11433000		13003000	12792000	8979000	12290000	11749000		12597000	12416000	7729000	11660000
1994	12764000	12573000	8509000	11867000	11428000		12978000	12763000	9182000	12194000	11745000		12550000	12383000	7836000	11540000	11111000									1994	214000	190000	673000	327000	317000		1994	12762000	12570000	8122000	11847000	11325000		12971000	12764000	8691000	12170000	11669000		12553000	12376000	7553000	11524000
1995	12637000	12301000	7862000	11949000	11187000		12853000	12501000	8475000	12290000	11536000		12421000	12101000	7249000	11608000	10838000									1995	216000	200000	613000	341000	349000		1995	12637000	12309000	8359000	11928000	11308000		12847000	12505000	8931000	12259000	11620000		12427000	12113000	7787000	11597000
1996	12790000	12630000	8704000	11723000	11462000		13007000	12821000	9275000	12076000	11773000		12573000	12439000	8133000	11370000	11151000									1996	217000	191000	571000	353000	311000		1996	12791000	12621000	8142000	11718000	11318000		12998000	12806000	8664000	12050000	11640000		12584000	12436000	7620000	11386000
1997	13024000	12783000	8057000	11893000	11439000		13245000	12973000	8624000	12238000	11767000		12803000	12593000	7490000	11548000	11111000									1997	221000	190000	567000	345000	328000		1997	13023000	12778000	8387000	11852000	11510000		13236000	12964000	8936000	12189000	11823000		12810000	12592000	7838000	11515000
1998	13030000	12826000	8182000	11342000	11345000		13239000	13020000	8757000	11684000	11653000		12821000	12632000	7607000	11000000	11037000									1998	209000	194000	575000	342000	308000		1998	13029000	12820000	7798000	11318000	11241000		13241000	13013000	8437000	11648000	11559000		12817000	12627000	7159000	10988000
1999	12726000	12652000	8442000	11351000	11293000		12943000	12847000	9113000	11683000	11616000		12509000	12457000	7771000	11019000	10970000									1999	217000	195000	671000	332000	323000		1999	12727000	12649000	8412000	11349000	11284000		12941000	12837000	8961000	11674000	11588000		12513000	12461000	7863000	11024000
2000	12593000	12419000	8208000	11504000	11181000		12811000	12614000	8793000	11834000	11493000		12375000	12224000	7623000	11174000	10869000									2000	218000	195000	585000	330000	312000		2000	12594000	12419000	8464000	11514000	11248000		12806000	12608000	9018000	11834000	11549000		12382000	12230000	7910000	11194000
2001	12768000	12633000	8159000	11383000	11236000		13023000	12849000	8788000	11766000	11577000		12513000	12417000	7530000	11000000	10895000									2001	255000	216000	629000	383000	341000		2001	12769000	12630000	7978000	11396000	11193000		13018000	12844000	8585000	11753000	11534000		12520000	12416000	7371000	11039000
2002	12736000	12501000	7979000	11580000	11199000		12991000	12721000	8617000	11953000	11564000		12481000	12281000	7341000	11207000	10834000									2002	255000	220000	638000	373000	365000		2002	12737000	12500000	8140000	11551000	11232000		12985000	12719000	8722000	11912000	11581000		12489000	12281000	7558000	11190000
2003	12728000	12580000	7959000	11445000	11178000		12979000	12793000	8584000	11819000	11503000		12477000	12367000	7334000	11071000	10853000									2003	251000	213000	625000	374000	325000		2003	12731000	12578000	7957000	11435000	11175000		12975000	12789000	8527000	11790000	11494000		12487000	12367000	7387000	11080000
2004	12724000	12390000	8172000	11624000	11228000		12984000	12613000	8833000	12034000	11598000		12464000	12167000	7511000	11214000	10858000									2004	260000	223000	661000	410000	370000		2004	12727000	12390000	8014000	11622000	11188000		12982000	12613000	8643000	12010000	11547000		12472000	12167000	7385000	11234000
2005	12540000	12447000	7545000	11341000	10968000		12817000	12677000	8171000	11746000	11320000		12263000	12217000	6919000	10936000	10616000									2005	277000	230000	626000	405000	352000		2005	12544000	12446000	8019000	11389000	11100000		12814000	12677000	8623000	11780000	11445000		12274000	12215000	7415000	10998000
2006	12466000	12121000	7631000	11210000	10857000		12722000	12342000	8225000	11618000	11177000		12210000	11900000	7037000	10802000	10537000									2006	256000	221000	594000	408000	320000		2006	12471000	12125000	7563000	11176000	10834000		12747000	12349000	8152000	11574000	11206000		12195000	11901000	6974000	10778000
2007	12433000	12209000	7101000	11398000	10785000		12696000	12452000	7684000	11821000	11130000		12170000	11966000	6518000	10975000	10440000									2007	263000	243000	583000	423000	345000		2007	12439000	12212000	7568000	11524000	10936000		12696000	12458000	8152000	11929000	11269000		12182000	11966000	6984000	11119000
2008	12516000	12322000	7564000	11565000	10992000		12791000	12533000	8181000	11972000	11358000		12241000	12111000	6947000	11158000	10626000									2008	275000	211000	617000	407000	366000		2008	12514000	12323000	7027000	11520000	10846000		12780000	12534000	7623000	11903000	11211000		12248000	12112000	6431000	11137000
2009	12572000	12439000	7524000	11290000	10956000		12819000	12664000	8109000	11699000	11314000		12325000	12214000	6939000	10881000	10598000									2009	247000	225000	585000	409000	358000		2009	12573000	12438000	7868000	11254000	11033000		12814000	12661000	8451000	11648000	11373000		12332000	12215000	7285000	10860000
2010	12571000	12441000	7334000	11062000	10852000		12818000	12647000	7976000	11469000	11166000		12324000	12235000	6692000	10655000	10538000									2010	247000	206000	642000	407000	314000		2010	12576000	12440000	7371000	11068000	10864000		12816000	12645000	7928000	11460000	11171000		12336000	12235000	6814000	10676000
2011	12540000	12333000	7062000	11169000	10776000		12806000	12540000	7712000	11555000	11093000		12274000	12126000	6412000	10783000	10459000									2011	266000	207000	650000	386000	317000		2011	12546000	12334000	7354000	11284000	10880000		12803000	12544000	7913000	11654000	11195000		12289000	12124000	6795000	10914000
2012	12383000	12243000	6924000	11052000	10651000		12687000	12464000	7652000	11462000	11036000		12079000	12022000	6196000	10642000	10266000									2012	304000	221000	728000	410000	385000		2012	12383000	12245000	7006000	11126000	10690000		12703000	12466000	7659000	11522000	11122000		12063000	12024000	6353000	10730000
2013	12494000	12369000	7393000	11503000	10940000		12764000	12598000	8094000	11935000	11305000		12224000	12140000	6692000	11071000	10575000									2013	270000	229000	701000	432000	365000		2013	12497000	12370000	7242000	11394000	10876000		12760000	12601000	7898000	11811000	11269000		12234000	12139000	6586000	10977000
2014	12417000	12311000	7454000	11600000	10946000		12726000	12537000	8182000	12019000	11303000		12108000	12085000	6726000	11181000	10589000									2014	309000	226000	728000	419000	357000		2014	12419000	12312000	7586000	11574000	10973000		12721000	12541000	8176000	11980000	11317000		12117000	12083000	6996000	11168000
2015	12536000	12164000	7269000	11162000	10783000		12835000	12390000	7949000	11584000	11152000		12237000	11938000	6589000	10740000	10414000									2015	299000	226000	680000	422000	369000		2015	12537000	12167000	7584000	11251000	10885000		12827000	12405000	8201000	11653000	11263000		12247000	11929000	6967000	10849000
[truncated: 7 more columns]

## Sheet: 02 North American recons
																			Temperature-based proxy - unadjusted								T-based CI - unadjusted
							Upper bound						Lower bound						N. American Arctic, unadj version								N. American Arctic, unadj version													Upper bound						Lower bound
Rescaled (unadjusted T)							Rescaled (unadjusted T)						Rescaled (unadjusted T)																				Rescaled (MW09-adjusted T)							Rescaled (unadjusted T)						Rescaled (unadjusted T)
North American, sea ice extent (million km2)							North American, sea ice extent (million km2)						North American, sea ice extent (million km2)						Year	winter	spring	summer	autumn	annual		Year	winter	spring	summer	autumn	annual		North American, sea ice extent (million km2)							North American, sea ice extent (million km2)						North American, sea ice extent (million km2)
Year	Winter	Spring	Summer	Autumn	Annual		Winter	Spring	Summer	Autumn	Annual		Winter	Spring	Summer	Autumn	Annual																Year	Winter	Spring	Summer	Autumn	Annual		Winter	Spring	Summer	Autumn	Annual		Winter	Spring	Summer	Autumn
1901	5762000	5695000	3695000	5526000	5148000		5842000	5720000	4103000	5853000	5381000		5682000	5670000	3287000	5199000	4915000		1901	5856000	5738000	3685000	5526000	5176000		1901	80000	25000	408000	327000	233000		1901	5763000	5700000	3938000	5523000	5204000		5841000	5726000	4422000	5854000	5459000		5685000	5674000	3454000	5192000
1902	5738000	5673000	3188000	5753000	4883000		5817000	5697000	3527000	6034000	5067000		5659000	5649000	2849000	5472000	4699000		1902	5819000	5711000	3673000	5753000	5306000		1902	79000	24000	339000	281000	184000		1902	5739000	5676000	3309000	5802000	4908000		5816000	5701000	3697000	6085000	5107000		5662000	5651000	2921000	5519000
1903	5762000	5685000	3333000	5343000	4976000		5835000	5708000	3725000	5682000	5209000		5689000	5662000	2941000	5004000	4743000		1903	5827000	5725000	3522000	5343000	5187000		1903	73000	23000	392000	339000	233000		1903	5763000	5690000	3489000	5380000	5012000		5833000	5717000	3943000	5724000	5267000		5693000	5663000	3035000	5036000
1904	5787000	5710000	3260000	5255000	5019000		5866000	5739000	3899000	5775000	5252000		5708000	5681000	2621000	4735000	4786000		1904	5911000	5698000	4448000	5255000	5278000		1904	79000	29000	639000	520000	233000		1904	5787000	5717000	3399000	5355000	5060000		5862000	5746000	4036000	5884000	5315000		5712000	5688000	2762000	4826000
1905	5738000	5667000	3134000	5356000	4848000		5848000	5700000	3658000	5764000	5039000		5628000	5634000	2610000	4948000	4657000		1905	5748000	5663000	3632000	5356000	5046000		1905	110000	33000	524000	408000	191000		1905	5739000	5669000	3242000	5418000	4868000		5847000	5700000	3759000	5833000	5072000		5631000	5638000	2725000	5003000
1906	5787000	5704000	3587000	5604000	5126000		5897000	5733000	4035000	6012000	5359000		5677000	5675000	3139000	5196000	4893000		1906	5857000	5688000	3485000	5604000	5234000		1906	110000	29000	448000	408000	233000		1906	5787000	5711000	3803000	5670000	5180000		5894000	5744000	4324000	6084000	5434000		5680000	5678000	3282000	5256000
1907	5957000	5732000	3297000	5304000	5126000		6039000	5758000	3825000	5824000	5359000		5875000	5706000	2769000	4784000	4893000		1907	5890000	5714000	3615000	5304000	5298000		1907	82000	26000	528000	520000	233000		1907	5955000	5741000	3444000	5405000	5180000		6034000	5769000	4081000	5934000	5434000		5876000	5713000	2807000	4876000
1908	5762000	5710000	3677000	5494000	5169000		5867000	5743000	4125000	5779000	5401000		5657000	5677000	3229000	5209000	4937000		1908	5813000	5715000	3799000	5494000	5162000		1908	105000	33000	448000	285000	232000		1908	5763000	5717000	3916000	5541000	5228000		5866000	5750000	4553000	5829000	5483000		5660000	5684000	3279000	5253000
1909	5811000	5701000	3460000	5636000	5076000		5921000	5734000	3822000	5917000	5268000		5701000	5668000	3098000	5355000	4884000		1909	5903000	5712000	3844000	5636000	5395000		1909	110000	33000	362000	281000	192000		1909	5811000	5707000	3646000	5721000	5124000		5918000	5738000	4051000	6002000	5328000		5704000	5676000	3241000	5440000
1910	5738000	5679000	3315000	5458000	4948000		5809000	5700000	3678000	5711000	5107000		5667000	5658000	2952000	5205000	4789000		1910	5849000	5718000	3554000	5458000	5237000		1910	71000	21000	363000	253000	159000		1910	5739000	5683000	3467000	5527000	4980000		5808000	5705000	3872000	5780000	5142000		5670000	5661000	3062000	5274000
1911	5860000	5707000	3623000	5246000	5169000		5925000	5727000	3962000	5499000	5331000		5795000	5687000	3284000	4993000	5007000		1911	5833000	5718000	3717000	5246000	5229000		1911	65000	20000	339000	253000	162000		1911	5859000	5714000	3848000	5312000	5228000		5921000	5734000	4233000	5565000	5400000		5797000	5694000	3463000	5059000
1912	5811000	5722000	3623000	5238000	5191000		5876000	5742000	3930000	5492000	5333000		5746000	5702000	3316000	4984000	5049000		1912	5678000	5706000	3913000	5238000	5000000		1912	65000	20000	307000	254000	142000		1912	5811000	5731000	3848000	5304000	5252000		5873000	5753000	4192000	5557000	5397000		5749000	5709000	3504000	5051000
1913	5787000	5698000	3840000	5413000	5212000		5855000	5720000	4171000	5694000	5397000		5719000	5676000	3509000	5132000	5027000		1913	5803000	5706000	4064000	5413000	5101000		1913	68000	22000	331000	281000	185000		1913	5787000	5704000	4118000	5494000	5276000		5852000	5727000	4490000	5775000	5460000		5722000	5681000	3746000	5213000
1914	5884000	5719000	3695000	5088000	5234000		5955000	5740000	4112000	5355000	5425000		5813000	5698000	3278000	4821000	5043000		1914	5787000	5705000	4072000	5088000	5148000		1914	71000	21000	417000	267000	191000		1914	5883000	5728000	3938000	5121000	5301000		5952000	5750000	4310000	5387000	5505000		5814000	5706000	3566000	4855000
1915	5860000	5707000	3714000	5480000	5205000		5927000	5728000	4053000	5765000	5367000		5793000	5686000	3375000	5195000	5043000		1915	5728000	5669000	3387000	5480000	5025000		1915	67000	21000	339000	285000	162000		1915	5859000	5714000	3961000	5527000	5268000		5923000	5735000	4346000	5815000	5440000		5795000	5693000	3576000	5239000
1916	5787000	5716000	4112000	5445000	5362000		5859000	5738000	4451000	5730000	5524000		5715000	5694000	3773000	5160000	5200000		1916	5841000	5673000	3640000	5445000	5181000		1916	72000	22000	339000	285000	162000		1916	5787000	5724000	4455000	5492000	5445000		5857000	5748000	4840000	5780000	5617000		5717000	5700000	4070000	5204000
1917	5811000	5722000	3859000	6237000	5284000		5883000	5742000	4173000	6515000	5446000		5739000	5702000	3545000	5959000	5122000		1917	5804000	5729000	3632000	6237000	5405000		1917	72000	20000	314000	278000	162000		1917	5811000	5731000	4140000	6317000	5357000		5881000	5752000	4474000	6623000	5548000		5741000	5710000	3806000	6011000
1918	5787000	5738000	4130000	5549000	5419000		5854000	5761000	4436000	5781000	5581000		5720000	5715000	3824000	5317000	5257000		1918	5876000	5746000	3452000	5549000	5372000		1918	67000	23000	306000	232000	162000		1918	5787000	5748000	4477000	5610000	5509000		5851000	5771000	4820000	5841000	5681000		5723000	5725000	4134000	5379000
1919	5811000	5728000	4004000	5562000	5355000		5876000	5746000	4286000	5794000	5497000		5746000	5710000	3722000	5330000	5213000		1919	5827000	5716000	3395000	5562000	5239000		1919	65000	18000	282000	232000	142000		1919	5811000	5738000	4320000	5623000	5437000		5873000	5757000	4633000	5854000	5582000		5749000	5719000	4007000	5392000
1920	5884000	5732000	4130000	5438000	5434000		5944000	5750000	4450000	5692000	5575000		5824000	5714000	3810000	5184000	5293000		1920	5785000	5735000	3766000	5438000	5238000		1920	60000	18000	320000	254000	141000		1920	5883000	5741000	4477000	5506000	5525000		5940000	5760000	4789000	5759000	5670000		5826000	5722000	4165000	5253000
1921	5762000	5725000	3714000	5309000	5219000		5822000	5743000	4061000	5563000	5362000		5702000	5707000	3367000	5055000	5076000		1921	5842000	5697000	3681000	5309000	5191000		1921	60000	18000	347000	254000	143000		1921	5763000	5735000	3961000	5376000	5284000		5820000	5754000	4293000	5629000	5428000		5706000	5716000	3629000	5123000
1922	5811000	5710000	3840000	5254000	5248000		5876000	5729000	4141000	5486000	5391000		5746000	5691000	3539000	5022000	5105000		1922	5808000	5716000	4207000	5254000	5203000		1922	65000	19000	301000	232000	143000		1922	5811000	5717000	4118000	5310000	5317000		5873000	5736000	4451000	5541000	5461000		5749000	5698000	3785000	5079000
1923	5738000	5695000	3714000	5169000	5141000		5798000	5713000	3989000	5398000	5270000		5678000	5677000	3439000	4940000	5012000		1923	5810000	5695000	3056000	5169000	5040000		1923	60000	18000	275000	229000	129000		1923	5739000	5700000	3961000	5211000	5196000		5796000	5719000	4268000	5442000	5328000		5682000	5681000	3654000	4980000
1924	5835000	5710000	3333000	5491000	5055000		5893000	5728000	3653000	5720000	5184000		5777000	5692000	3013000	5262000	4926000		1924	5745000	5729000	3885000	5491000	5153000		1924	58000	18000	320000	229000	129000		1924	5835000	5717000	3489000	5539000	5100000		5891000	5735000	3801000	5769000	5231000		5779000	5699000	3177000	5309000
1925	5787000	5710000	3605000	5022000	5148000		5851000	5728000	3897000	5258000	5285000		5723000	5692000	3313000	4786000	5011000		1925	5922000	5695000	3452000	5022000	5168000		1925	64000	18000	292000	236000	137000		1925	5787000	5717000	3826000	5065000	5204000		5848000	5735000	4152000	5302000	5345000		5726000	5699000	3500000	4828000
1926	5787000	5698000	3695000	5148000	5155000		5847000	5716000	4002000	5377000	5292000		5727000	5680000	3388000	4919000	5018000		1926	5633000	5672000	3358000	5148000	4805000		1926	60000	18000	307000	229000	137000		1926	5787000	5704000	3938000	5189000	5212000		5845000	5722000	4236000	5419000	5353000		5729000	5686000	3640000	4959000
1927	5738000	5691000	3550000	5765000	5069000		5801000	5709000	3817000	5994000	5212000		5675000	5673000	3283000	5536000	4926000		1927	5771000	5720000	3383000	5765000	5201000		1927	63000	18000	267000	229000	143000		1927	5739000	5697000	3759000	5817000	5116000		5800000	5715000	4062000	6047000	5260000		5678000	5679000	3456000	5587000
1928	5738000	5685000	3677000	5027000	5105000		5796000	5703000	4008000	5232000	5242000		5680000	5667000	3346000	4822000	4968000		1928	5717000	5712000	3860000	5027000	4988000		1928	58000	18000	331000	205000	137000		1928	5739000	5690000	3916000	5055000	5156000		5795000	5708000	4230000	5260000	5297000		5683000	5672000	3602000	4850000
1929	5787000	5688000	3587000	5209000	5091000		5836000	5705000	3878000	5431000	5217000		5738000	5671000	3296000	4987000	4965000		1929	5740000	5709000	3583000	5209000	5041000		1929	49000	17000	291000	222000	126000		1929	5787000	5693000	3803000	5257000	5140000		5834000	5710000	4087000	5478000	5263000		5740000	5676000	3519000	5036000
1930	5738000	5679000	3840000	5281000	5155000		5794000	5696000	4162000	5474000	5295000		5682000	5662000	3518000	5088000	5015000		1930	5845000	5704000	3260000	5281000	5139000		1930	56000	17000	322000	193000	140000		1930	5739000	5683000	4118000	5306000	5212000		5792000	5701000	4436000	5510000	5358000		5686000	5665000	3800000	5102000
1931	5738000	5679000	3623000	5189000	5069000		5786000	5697000	3896000	5381000	5184000		5690000	5661000	3350000	4997000	4954000		1931	5726000	5713000	3644000	5189000	5051000		1931	48000	18000	273000	192000	115000		1931	5739000	5683000	3848000	5217000	5116000		5789000	5701000	4118000	5409000	5231000		5689000	5665000	3578000	5025000
1932	5738000	5695000	3732000	5667000	5148000		5790000	5712000	4033000	5859000	5269000		5686000	5678000	3431000	5475000	5027000		1932	5862000	5694000	3656000	5667000	5312000		1932	52000	17000	301000	192000	121000		1932	5739000	5700000	3983000	5704000	5204000		5788000	5717000	4274000	5898000	5330000		5690000	5683000	3692000	5510000
1933	5762000	5701000	3895000	5872000	5234000		5810000	5717000	4176000	6047000	5343000		5714000	5685000	3614000	5697000	5125000		1933	5864000	5709000	3742000	5872000	5357000		1933	48000	16000	281000	175000	109000		1933	5763000	5707000	4185000	5903000	5301000		5809000	5723000	4461000	6079000	5414000		5717000	5691000	3909000	5727000
1934	5884000	5710000	4076000	5253000	5362000		5928000	5727000	4326000	5443000	5471000		5840000	5693000	3826000	5063000	5253000		1934	5811000	5703000	3872000	5253000	5114000		1934	44000	17000	250000	190000	109000		1934	5883000	5717000	4410000	5270000	5445000		5925000	5734000	4683000	5462000	5558000		5841000	5700000	4137000	5078000
1935	5957000	5725000	3623000	5596000	5241000		6003000	5741000	3867000	5776000	5349000		5911000	5709000	3379000	5416000	5133000		1935	5810000	5708000	3693000	5596000	5195000		1935	46000	16000	244000	180000	108000		1935	5955000	5735000	3848000	5615000	5309000		5999000	5751000	4113000	5795000	5420000		5911000	5719000	3583000	5435000
1936	5957000	5722000	3532000	5560000	5198000		6001000	5739000	3780000	5731000	5304000		5913000	5705000	3284000	5389000	5092000		1936	5838000	5695000	3595000	5560000	5152000		1936	44000	17000	248000	171000	106000		1936	5955000	5731000	3736000	5577000	5260000		5997000	5749000	4004000	5748000	5368000		5913000	5713000	3468000	5406000
1937	5884000	5716000	3859000	5244000	5291000		5927000	5734000	4117000	5415000	5398000		5841000	5698000	3601000	5073000	5184000		1937	5756000	5689000	3628000	5244000	5077000		1937	43000	18000	258000	171000	107000		1937	5883000	5724000	4140000	5266000	5365000		5925000	5742000	4429000	5447000	5480000		5841000	5706000	3851000	5085000
1938	5860000	5719000	3623000	5076000	5198000		5909000	5736000	3883000	5251000	5296000		5811000	5702000	3363000	4901000	5100000		1938	5777000	5690000	3175000	5076000	5003000		1938	49000	17000	260000	175000	98000		1938	5859000	5728000	3848000	5090000	5260000		5909000	5746000	4142000	5275000	5366000		5809000	5710000	3554000	4905000
1939	5908000	5728000	3659000	5278000	5248000		5953000	5743000	3892000	5462000	5343000		5863000	5713000	3426000	5094000	5153000		1939	5808000	5680000	3848000	5278000	5104000		1939	45000	15000	233000	184000	95000		1939	5907000	5738000	3893000	5291000	5317000		5952000	5755000	4145000	5477000	5418000		5862000	5721000	3641000	5105000
1940	5673000	5677000	3305000	5242000	4909000		5717000	5692000	3543000	5410000	5000000		5629000	5662000	3067000	5074000	4818000		1940	5673000	5677000	3305000	5242000	4909000		1940	44000	15000	238000	168000	91000		1940	5671000	5678000	3343000	5249000	4907000		5713000	5694000	3620000	5417000	5009000		5629000	5662000	3066000	5081000
1941	5712000	5687000	3571000	5545000	5046000		5754000	5702000	3805000	5713000	5142000		5670000	5672000	3337000	5377000	4950000		1941	5712000	5687000	3571000	5545000	5046000		1941	42000	15000	234000	168000	96000		1941	5707000	5688000	3665000	5548000	5042000		5748000	5704000	3926000	5717000	5144000		5666000	5672000	3404000	5379000
1942	5674000	5683000	3505000	5573000	5029000		5723000	5697000	3728000	5722000	5137000		5625000	5669000	3282000	5424000	4921000		1942	5674000	5683000	3505000	5573000	5029000		1942	49000	14000	223000	149000	108000		1942	5672000	5683000	3624000	5597000	5037000		5714000	5698000	3878000	5753000	5150000		5630000	5668000	3370000	5441000
1943	5795000	5692000	3640000	4911000	5015000		5832000	5706000	3857000	5059000	5107000		5758000	5678000	3423000	4763000	4923000		1943	5795000	5692000	3640000	4911000	5015000		1943	37000	14000	217000	148000	92000		1943	5788000	5693000	3724000	4907000	5007000		5824000	5708000	3960000	5060000	5101000		5752000	5678000	3488000	4754000
1944	5733000	5691000	3664000	5140000	5004000		5770000	5704000	3863000	5293000	5089000		5696000	5678000	3465000	4987000	4919000		1944	5733000	5691000	3664000	5140000	5004000		1944	37000	13000	199000	153000	85000		1944	5726000	5691000	3729000	5135000	4993000		5762000	5704000	3940000	5290000	5080000		5690000	5678000	3518000	4980000
1945	5700000	5730000	3832000	5507000	5142000		5741000	5743000	4031000	5645000	5220000		5659000	5717000	3633000	5369000	5064000		1945	5700000	5730000	3832000	5507000	5142000		1945	41000	13000	199000	138000	78000		1945	5695000	5732000	3920000	5507000	5144000		5729000	5745000	4129000	5648000	5224000		5661000	5719000	3711000	5366000
1946	5785000	5700000	4003000	5526000	5221000		5824000	5712000	4193000	5661000	5293000		5746000	5688000	3813000	5391000	5149000		1946	5788000	5696000	3721000	5526000	5165000		1946	39000	12000	190000	135000	72000		1946	5776000	5702000	4104000	5536000	5227000		5808000	5714000	4304000	5673000	5301000		5744000	5690000	3904000	5399000
1947	5770000	5680000	3620000	4956000	5035000		5810000	5693000	3816000	5089000	5110000		5730000	5667000	3424000	4823000	4960000		1947	5752000	5708000	3991000	4956000	5047000		1947	40000	13000	196000	133000	75000		1947	5761000	5682000	3692000	4960000	5030000		5794000	5696000	3897000	5095000	5106000		5728000	5668000	3487000	4825000
1948	5800000	5700000	3265000	5556000	5056000		5838000	5712000	3450000	5677000	5129000		5762000	5688000	3080000	5435000	4983000		1948	5809000	5710000	3632000	5556000	5230000		1948	38000	12000	185000	121000	73000		1948	5792000	5702000	3311000	5555000	5052000		5825000	5715000	3513000	5683000	5129000		5759000	5689000	3109000	5427000
1949	5845000	5708000	3738000	5299000	5221000		5879000	5719000	3912000	5419000	5283000		5811000	5697000	3564000	5179000	5159000		1949	5804000	5723000	3420000	5299000	5163000		1949	34000	11000	174000	120000	62000		1949	5839000	5710000	3819000	5293000	5227000		5867000	5722000	4006000	5417000	5292000		5811000	5698000	3632000	5169000
1950	5800000	5705000	3974000	5475000	5242000		5833000	5717000	4140000	5585000	5304000		5767000	5693000	3808000	5365000	5180000		1950	5830000	5708000	3571000	5475000	5221000		1950	33000	12000	166000	110000	62000		1950	5792000	5707000	4072000	5481000	5249000		5820000	5719000	4248000	5593000	5313000		5764000	5695000	3896000	5369000
1951	5800000	5710000	3324000	5565000	5111000		5831000	5720000	3488000	5677000	5171000		5769000	5700000	3160000	5453000	5051000		1951	5843000	5684000	3403000	5565000	5195000		1951	31000	10000	164000	112000	60000		1951	5792000	5712000	3375000	5574000	5110000		5819000	5724000	3551000	5688000	5174000		5765000	5700000	3199000	5460000
1952	5845000	5705000	3679000	5734000	5200000		5876000	5716000	3842000	5843000	5259000		5814000	5694000	3516000	5625000	5141000		1952	5814000	5680000	3864000	5073000	5071000		1952	31000	11000	163000	109000	59000		1952	5839000	5707000	3755000	5744000	5205000		5865000	5718000	3927000	5853000	5266000		5813000	5696000	3583000	5635000
1953	5785000	5691000	3551000	5367000	5117000		5815000	5701000	3713000	5476000	5177000		5755000	5681000	3389000	5258000	5057000		1953	5786000	5669000	3522000	5411000	5080000		1953	30000	10000	162000	109000	60000		1953	5775000	5690000	3589000	5364000	5110000		5800000	5701000	3766000	5476000	5173000		5750000	5679000	3412000	5252000
1954	5774000	5705000	3377000	5388000	5084000		5804000	5715000	3549000	5497000	5145000		5744000	5695000	3205000	5279000	5023000		1954	5811000	5710000	3203000	5343000	5137000		1954	30000	10000	172000	109000	61000		1954	5765000	5705000	3396000	5386000	5076000		5790000	5716000	3571000	5496000	5138000		5740000	5694000	3221000	5276000
1955	5785000	5720000	3427000	5216000	5091000		5816000	5730000	3589000	5324000	5151000		5754000	5710000	3265000	5108000	5031000		1955	5805000	5699000	3677000	5542000	5205000		1955	31000	10000	162000	108000	60000		1955	5775000	5721000	3451000	5211000	5083000		5801000	5732000	3623000	5320000	5144000		5749000	5710000	3279000	5102000
1956	5763000	5685000	3650000	5561000	5164000		5793000	5695000	3819000	5668000	5223000		5733000	5675000	3481000	5454000	5105000		1956	5818000	5712000	3823000	5825000	5310000		1956	30000	10000	169000	107000	59000		1956	5754000	5683000	3700000	5560000	5160000		5779000	5694000	3872000	5668000	5219000		5729000	5672000	3528000	5452000
1957	5850000	5688000	3725000	5453000	5200000		5880000	5698000	3878000	5552000	5260000		5820000	5678000	3572000	5354000	5140000		1957	5775000	5704000	3354000	5538000	5141000		1957	30000	10000	153000	99000	60000		1957	5838000	5687000	3782000	5451000	5199000		5863000	5698000	3949000	5555000	5260000		5813000	5676000	3615000	5347000
1958	5829000	5708000	3216000	5453000	5069000		5858000	5717000	3365000	5544000	5128000		5800000	5699000	3067000	5362000	5010000		1958	5742000	5698000	3248000	5464000	5071000		1958	29000	9000	149000	91000	59000		1958	5817000	5709000	3216000	5451000	5060000		5843000	5719000	3378000	5543000	5120000		5791000	5699000	3054000	5359000
1959	5785000	5717000	3675000	5518000	5211000		5811000	5725000	3817000	5605000	5266000		5759000	5709000	3533000	5431000	5156000		1959	5802000	5719000	3934000	5419000	5210000		1959	26000	8000	142000	87000	55000		1959	5775000	5718000	3727000	5517000	5210000		5797000	5727000	3880000	5605000	5266000		5753000	5709000	3574000	5429000
1960	5752000	5699000	3365000	5238000	5040000		5778000	5708000	3503000	5324000	5093000		5726000	5690000	3227000	5152000	4987000		1960	5767000	5691000	3452000	5295000	5061000		1960	26000	9000	138000	86000	53000		1960	5744000	5699000	3382000	5233000	5030000		5766000	5708000	3531000	5319000	5083000		5722000	5690000	3233000	5147000
1961	5752000	5682000	3352000	5345000	5033000		5776000	5690000	3487000	5433000	5082000		5728000	5674000	3217000	5257000	4984000		1961	5843000	5708000	3795000	5673000	5283000		1961	24000	8000	135000	88000	49000		1961	5744000	5680000	3368000	5342000	5022000		5765000	5689000	3517000	5433000	5073000		5723000	5671000	3219000	5251000
1962	5807000	5691000	3538000	5259000	5102000		5831000	5700000	3673000	5341000	5150000		5783000	5682000	3403000	5177000	5054000		1962	5770000	5712000	3334000	5297000	5103000		1962	24000	9000	135000	82000	48000		1962	5796000	5690000	3575000	5255000	5095000		5817000	5699000	3720000	5338000	5144000		5775000	5681000	3430000	5172000
1963	5686000	5699000	3935000	5496000	5230000		5711000	5708000	4076000	5581000	5279000		5661000	5690000	3794000	5411000	5181000		1963	5768000	5697000	3697000	5298000	5089000		1963	25000	9000	141000	85000	49000		1963	5681000	5699000	4017000	5495000	5229000		5702000	5707000	4164000	5581000	5278000		5660000	5691000	3870000	5409000
1964	5818000	5708000	3861000	5302000	5230000		5842000	5716000	3994000	5388000	5278000		5794000	5700000	3728000	5216000	5182000		1964	5840000	5729000	3677000	5515000	5275000		1964	24000	8000	133000	86000	48000		1964	5807000	5709000	3934000	5298000	5229000		5829000	5717000	4077000	5385000	5278000		5785000	5701000	3791000	5211000
1965	5730000	5685000	3712000	5388000	5142000		5754000	5693000	3846000	5471000	5187000		5706000	5677000	3578000	5305000	5097000		1965	5794000	5700000	3881000	5463000	5178000		1965	24000	8000	134000	83000	45000		1965	5723000	5683000	3769000	5386000	5137000		5743000	5691000	3909000	5470000	5183000		5703000	5675000	3629000	5302000
1966	5774000	5691000	3340000	5582000	5088000		5797000	5699000	3473000	5664000	5134000		5751000	5683000	3207000	5500000	5042000		1966	5833000	5708000	3232000	5529000	5202000		1966	23000	8000	133000	82000	46000		1966	5765000	5690000	3354000	5582000	5080000		5785000	5698000	3494000	5667000	5127000		5745000	5682000	3214000	5497000
1967	5840000	5741000	3824000	5539000	5306000		5864000	5749000	3958000	5620000	5354000		5816000	5733000	3690000	5458000	5258000		1967	5817000	5707000	3848000	5342000	5181000		1967	24000	8000	134000	81000	48000		1967	5828000	5743000	3893000	5538000	5310000		5849000	5751000	4033000	5620000	5359000		5807000	5735000	3753000	5456000
1968	5861000	5717000	3278000	5453000	5109000		5884000	5725000	3407000	5533000	5154000		5838000	5709000	3149000	5373000	5064000		1968	5778000	5706000	3664000	5339000	5130000		1968	23000	8000	129000	80000	45000		1968	5849000	5718000	3285000	5451000	5103000		5870000	5726000	3424000	5532000	5149000		5828000	5710000	3146000	5370000
1969	5818000	5723000	3911000	5604000	5313000		5841000	5731000	4038000	5684000	5358000		5795000	5715000	3784000	5524000	5268000		1969	5771000	5699000	3652000	5134000	5060000		1969	23000	8000	127000	80000	45000		1969	5807000	5724000	3990000	5604000	5318000		5827000	5732000	4126000	5684000	5364000		5787000	5716000	3854000	5524000
1970	5850000	5711000	3824000	5496000	5266000		5873000	5719000	3951000	5579000	5312000		5827000	5703000	3697000	5413000	5220000		1970	5763000	5715000	3750000	5521000	5179000		1970	23000	8000	127000	83000	46000		1970	5838000	5712000	3893000	5495000	5268000		5858000	5720000	4030000	5579000	5313000		5818000	5704000	3756000	5411000
1971	5850000	5714000	3700000	5884000	5299000		5873000	5721000	3827000	5967000	5346000		5827000	5707000	3573000	5801000	5252000		1971	5814000	5693000	3517000	5584000	5196000		1971	23000	7000	127000	83000	47000		1971	5838000	5715000	3755000	5887000	5302000		5858000	5724000	3892000	5971000	5350000		5818000	5706000	3618000	5803000
1972	5873000	5712000	3789000	5847000	5450000		5897000	5720000	3918000	5929000	5496000		5849000	5704000	3660000	5765000	5404000		1972	5880000	5734000	4072000	5651000	5389000		1972	24000	8000	129000	82000	46000		1972	5859000	5714000	3854000	5852000	5450000		5879000	5723000	3995000	5934000	5496000		5839000	5705000	3713000	5770000
1973	5794000	5707000	3593000	5388000	5170000		5817000	5715000	3720000	5468000	5217000		5771000	5699000	3466000	5308000	5123000		1973	5815000	5688000	3248000	5266000	5087000		1973	23000	8000	127000	80000	47000		1973	5785000	5709000	3622000	5383000	5166000		5805000	5717000	3760000	5464000	5213000		5765000	5701000	3484000	5302000
1974	5765000	5707000	3536000	5604000	5128000		5789000	5714000	3662000	5685000	5174000		5741000	5700000	3410000	5523000	5082000		1974	5848000	5712000	3705000	5624000	5285000		1974	24000	7000	126000	81000	46000		1974	5758000	5709000	3556000	5604000	5123000		5779000	5717000	3693000	5686000	5170000		5737000	5701000	3419000	5522000
1975	5823000	5686000	3500000	5631000	5100000		5846000	5694000	3627000	5713000	5146000		5800000	5678000	3373000	5549000	5054000		1975	5833000	5671000	3526000	5659000	5201000		1975	23000	8000	127000	82000	46000		1975	5813000	5687000	3514000	5631000	5095000		5833000	5695000	3653000	5714000	5142000		5793000	5679000	3375000	5548000
1976	5892000	5702000	3575000	5307000	5170000		5915000	5710000	3702000	5387000	5216000		5869000	5694000	3448000	5227000	5124000		1976	5823000	5686000	3513000	5371000	5137000		1976	23000	8000	127000	80000	46000		1976	5878000	5703000	3601000	5301000	5166000		5899000	5711000	3740000	5382000	5212000		5857000	5695000	3462000	5220000
1977	5686000	5671000	3524000	5469000	5055000		5709000	5679000	3653000	5550000	5102000		5663000	5663000	3395000	5388000	5008000		1977	5690000	5682000	3269000	5500000	4997000		1977	23000	8000	129000	81000	47000		1977	5684000	5670000	3542000	5466000	5049000		5705000	5679000	3683000	5549000	5096000		5663000	5661000	3401000	5383000
1978	5774000	5707000	3605000	5361000	5173000		5798000	5715000	3737000	5444000	5220000		5750000	5699000	3473000	5278000	5126000		1978	5719000	5723000	3787000	5531000	5152000		1978	24000	8000	132000	83000	47000		1978	5767000	5709000	3636000	5356000	5169000		5787000	5718000	3781000	5440000	5217000		5747000	5700000	3491000	5272000
1979	5714000	5668000	3648000	5431000	5107000	Satellite era	5737000	5676000	3783000	5517000	5156000		5691000	5660000	3513000	5345000	5058000		1979	5827000	5700000	3595000	5291000	5144000	Satellite era	1979	23000	8000	135000	86000	49000		1979	5716000	5667000	3658000	5431000	5105000	Satellite era	5737000	5676000	3801000	5517000	5153000		5695000	5658000	3515000	5345000
1980	5717000	5682000	3686000	5412000	5123000		5740000	5690000	3819000	5496000	5171000		5694000	5674000	3553000	5328000	5075000		1980	5711000	5687000	3770000	5413000	5045000		1980	23000	8000	133000	84000	48000		1980	5720000	5681000	3697000	5413000	5120000		5741000	5689000	3844000	5500000	5169000		5699000	5673000	3550000	5326000
1981	5722000	5691000	3478000	5231000	5030000		5745000	5699000	3615000	5322000	5082000		5699000	5683000	3341000	5140000	4978000		1981	5634000	5691000	3509000	5122000	4880000		1981	23000	8000	137000	91000	52000		1981	5724000	5690000	3480000	5230000	5030000		5747000	5699000	3632000	5326000	5084000		5701000	5681000	3328000	5134000
1982	5811000	5713000	3580000	5600000	5198000		5836000	5721000	3723000	5692000	5250000		5786000	5705000	3437000	5508000	5146000		1982	5825000	5717000	3607000	5677000	5264000		1982	25000	8000	143000	92000	52000		1982	5808000	5712000	3587000	5601000	5192000		5832000	5721000	3742000	5696000	5245000		5784000	5703000	3432000	5506000
1983	5860000	5729000	3929000	5592000	5317000		5886000	5737000	4070000	5681000	5371000		5834000	5721000	3788000	5503000	5263000		1983	5837000	5713000	3624000	5362000	5211000		1983	26000	8000	141000	89000	54000		1983	5853000	5728000	3951000	5593000	5305000		5878000	5737000	4106000	5686000	5361000		5828000	5719000	3796000	5500000
1984	5851000	5727000	3688000	5561000	5240000		5883000	5735000	3833000	5656000	5305000		5819000	5719000	3543000	5466000	5175000		1984	5789000	5683000	3656000	5584000	5178000		1984	32000	8000	145000	95000	65000		1984	5844000	5726000	3699000	5562000	5232000		5873000	5735000	3855000	5658000	5298000		5815000	5717000	3543000	5466000
1985	5757000	5692000	3568000	5305000	5086000		5785000	5700000	3712000	5399000	5151000		5729000	5684000	3424000	5211000	5021000		1985	5742000	5703000	3644000	5303000	5096000		1985	28000	8000	144000	94000	65000		1985	5757000	5691000	3575000	5305000	5084000		5784000	5700000	3732000	5402000	5151000		5730000	5682000	3418000	5208000
1986	5705000	5677000	3694000	5535000	5149000		5732000	5686000	3838000	5627000	5207000		5678000	5668000	3550000	5443000	5091000		1986	5751000	5718000	3787000	5552000	5171000		1986	27000	9000	144000	92000	58000		1986	5708000	5676000	3706000	5536000	5145000		5733000	5685000	3860000	5632000	5206000		5683000	5667000	3552000	5440000
1987	5765000	5705000	3350000	4754000	4899000		5791000	5714000	3495000	4843000	4957000		5739000	5696000	3205000	4665000	4841000		1987	5742000	5720000	3440000	5130000	5053000		1987	26000	9000	145000	89000	58000		1987	5764000	5704000	3346000	4752000	4904000		5789000	5714000	3499000	4843000	4964000		5739000	5694000	3193000	4661000
1988	5740000	5683000	3510000	5393000	5081000		5766000	5691000	3654000	5486000	5137000		5714000	5675000	3366000	5300000	5025000		1988	5722000	5681000	3285000	5433000	5016000		1988	26000	8000	144000	93000	56000		1988	5741000	5682000	3514000	5394000	5079000		5765000	5691000	3663000	5487000	5135000		5717000	5673000	3365000	5301000
1989	5775000	5694000	3601000	5457000	5141000		5801000	5702000	3751000	5549000	5198000		5749000	5686000	3451000	5365000	5084000		1989	5824000	5689000	3114000	5527000	5151000		1989	26000	8000	150000	92000	57000		1989	5773000	5693000	3609000	5457000	5137000		5798000	5701000	3765000	5548000	5194000		5748000	5685000	3453000	5366000
1990	5800000	5717000	3527000	5509000	5160000		5833000	5729000	3738000	5643000	5234000		5767000	5705000	3316000	5375000	5086000		1990	5826000	5679000	3440000	5754000	5216000		1990	33000	12000	211000	134000	74000		1990	5797000	5716000	3532000	5510000	5155000		5827000	5728000	3742000	5645000	5229000		5767000	5704000	3322000	5375000
1991	5799000	5704000	3585000	5471000	5156000		5837000	5717000	3801000	5605000	5228000		5761000	5691000	3369000	5337000	5084000		1991	5757000	5681000	3534000	5468000	5106000		1991	38000	13000	216000	134000	72000		1991	5796000	5703000	3592000	5472000	5152000		5827000	5716000	3806000	5607000	5225000		5765000	5690000	3378000	5337000
1992	5784000	5699000	3970000	5514000	5260000		5822000	5711000	4187000	5650000	5333000		5746000	5687000	3753000	5378000	5187000		1992	5744000	5728000	4125000	5477000	5222000		1992	38000	12000	217000	136000	73000		1992	5782000	5698000	3994000	5515000	5251000		5813000	5711000	4211000	5652000	5325000		5751000	5685000	3777000	5378000
1993	5860000	5728000	3427000	5536000	5169000		5898000	5740000	3660000	5671000	5246000		5822000	5716000	3194000	5401000	5092000		1993	5739000	5678000	3452000	5325000	5046000		1993	38000	12000	233000	135000	77000		1993	5853000	5727000	3427000	5537000	5164000		5884000	5740000	3653000	5673000	5240000		5822000	5714000	3201000	5401000
1994	5783000	5684000	3528000	5356000	5092000		5822000	5697000	3762000	5495000	5170000		5744000	5671000	3294000	5217000	5014000		1994	5795000	5678000	3220000	5360000	5069000		1994	39000	13000	234000	139000	78000		1994	5781000	5683000	3533000	5356000	5090000		5813000	5697000	3764000	5496000	5168000		5749000	5669000	3302000	5216000
1995	5761000	5683000	3424000	5394000	5066000		5800000	5697000	3670000	5538000	5148000		5722000	5669000	3178000	5250000	4984000		1995	5744000	5646000	3775000	5462000	5036000		1995	39000	14000	246000	144000	82000		1995	5760000	5682000	3424000	5394000	5065000		5792000	5697000	3667000	5542000	5148000		5728000	5667000	3181000	5246000
1996	5733000	5673000	3686000	5271000	5087000		5771000	5686000	3897000	5401000	5159000		5695000	5660000	3475000	5141000	5015000		1996	5747000	5687000	3709000	5472000	5122000		1996	38000	13000	211000	130000	72000		1996	5734000	5672000	3698000	5271000	5085000		5765000	5685000	3908000	5402000	5157000		5703000	5659000	3488000	5140000
1997	5748000	5681000	3334000	5309000	5014000		5782000	5694000	3549000	5449000	5090000		5714000	5668000	3119000	5169000	4938000		1997	5774000	5682000	3318000	5209000	5024000		1997	34000	13000	215000	140000	76000		1997	5748000	5680000	3330000	5309000	5015000		5779000	5693000	3544000	5454000	5093000		5717000	5667000	3116000	5164000
1998	5732000	5675000	3066000	4816000	4808000		5766000	5688000	3280000	4949000	4882000		5698000	5662000	2852000	4683000	4734000		1998	5747000	5651000	3326000	5040000	4897000		1998	34000	13000	214000	133000	74000		1998	5733000	5674000	3050000	4813000	4817000		5765000	5687000	3272000	4951000	4895000		5701000	5661000	2828000	4675000
1999	5740000	5679000	3489000	5055000	4986000		5774000	5691000	3698000	5189000	5060000		5706000	5667000	3280000	4921000	4912000		1999	5771000	5690000	3489000	5374000	5079000		1999	34000	12000	209000	134000	74000		1999	5741000	5678000	3492000	5054000	4988000		5773000	5691000	3704000	5196000	5064000		5709000	5665000	3280000	4912000
2000	5749000	5677000	3555000	5278000	5062000		5784000	5689000	3766000	5409000	5136000		5714000	5665000	3344000	5147000	4988000		2000	5722000	5696000	3595000	5200000	5009000		2000	35000	12000	211000	131000	74000		2000	5749000	5676000	3561000	5278000	5061000		5781000	5688000	3782000	5412000	5138000		5717000	5664000	3340000	5144000
2001	5737000	5677000	3440000	5089000	4980000		5775000	5690000	3692000	5225000	5060000		5699000	5664000	3188000	4953000	4900000		2001	5713000	5694000	3126000	5255000	4980000		2001	38000	13000	252000	136000	80000		2001	5738000	5676000	3440000	5088000	4982000		5772000	5689000	3667000	5224000	5063000		5704000	5663000	3213000	4952000
2002	5732000	5680000	3477000	5219000	5022000		5769000	5693000	3725000	5369000	5121000		5695000	5667000	3229000	5069000	4923000		2002	5769000	5703000	3399000	4876000	5003000		2002	37000	13000	248000	150000	99000		2002	5733000	5679000	3479000	5218000	5023000		5766000	5692000	3703000	5370000	5122000		5700000	5666000	3255000	5066000
2003	5711000	5673000	3299000	5014000	4911000		5746000	5685000	3538000	5153000	4986000		5676000	5661000	3060000	4875000	4836000		2003	5715000	5681000	3326000	5100000	4927000		2003	35000	12000	239000	139000	75000		2003	5714000	5672000	3293000	5013000	4916000		5746000	5684000	3515000	5153000	4994000		5682000	5660000	3071000	4873000
2004	5696000	5663000	3508000	5368000	5044000		5739000	5678000	3787000	5545000	5165000		5653000	5648000	3229000	5191000	4923000		2004	5790000	5671000	3534000	5404000	5012000		2004	43000	15000	279000	177000	121000		2004	5699000	5662000	3511000	5368000	5044000		5739000	5678000	3804000	5546000	5174000		5659000	5646000	3218000	5190000
2005	5704000	5654000	3308000	5131000	4927000		5765000	5672000	3577000	5315000	5059000		5643000	5636000	3039000	4947000	4795000		2005	5713000	5666000	3338000	5121000	4880000		2005	61000	18000	269000	184000	132000		2005	5707000	5653000	3302000	5130000	4932000		5763000	5671000	3601000	5315000	5068000		5651000	5635000	3003000	4945000
2006	5697000	5656000	3293000	5059000	4904000		5742000	5672000	3562000	5243000	5006000		5652000	5640000	3024000	4875000	4802000		2006	5680000	5670000	3122000	4881000	4801000		2006	45000	16000	269000	184000	102000		2006	5701000	5655000	3287000	5058000	4910000		5769000	5672000	3575000	5244000	5048000		5633000	5638000	2999000	4872000
2007	5698000	5673000	3126000	5358000	4949000		5745000	5689000	3383000	5542000	5051000		5651000	5657000	2869000	5174000	4847000		2007	5732000	5685000	3097000	5249000	4971000		2007	47000	16000	257000	184000	102000		2007	5702000	5672000	3112000	5359000	4952000		5746000	5689000	3387000	5544000	5054000		5658000	5655000	2837000	5174000
2008	5806000	5687000	2954000	5384000	4958000		5853000	5704000	3227000	5568000	5075000		5759000	5670000	2681000	5200000	4841000		2008	5801000	5679000	3407000	5299000	5076000		2008	47000	17000	273000	184000	117000		2008	5803000	5686000	2932000	5384000	4961000		5845000	5705000	3225000	5569000	5081000		5761000	5667000	2639000	5199000
2009	5751000	5688000	3260000	5167000	4964000		5798000	5705000	3516000	5367000	5087000		5704000	5671000	3004000	4967000	4841000		2009	5769000	5690000	3097000	5045000	4967000		2009	47000	17000	256000	200000	123000		2009	5751000	5687000	3252000	5166000	4967000		5794000	5704000	3531000	5368000	5089000		5708000	5670000	2973000	4964000
2010	5688000	5660000	3099000	4757000	4775000		5735000	5677000	3414000	4958000	4886000		5641000	5643000	2784000	4556000	4664000		2010	5648000	5648000	3016000	4774000	4677000		2010	47000	17000	315000	201000	111000		2010	5692000	5659000	3085000	4754000	4786000		5735000	5676000	3338000	4956000	4894000		5649000	5642000	2832000	4552000
2011	5680000	5682000	3010000	5165000	4868000		5744000	5699000	3340000	5343000	4986000		5616000	5665000	2680000	4987000	4750000		2011	5749000	5695000	3077000	5173000	5023000		2011	64000	17000	330000	178000	118000		2011	5685000	5681000	2991000	5164000	4875000		5743000	5698000	3254000	5342000	4992000		5627000	5664000	2728000	4986000
2012	5784000	5687000	2942000	5162000	4891000		5849000	5704000	3312000	5340000	5025000		5719000	5670000	2572000	4984000	4757000		2012	5795000	5670000	3150000	5378000	5135000		2012	65000	17000	370000	178000	134000		2012	5782000	5686000	2920000	5162000	4897000		5842000	5704000	3210000	5340000	5032000		5722000	5668000	2630000	4984000
2013	5718000	5671000	3254000	5362000	4989000		5785000	5688000	3605000	5541000	5111000		5651000	5654000	2903000	5183000	4867000		2013	5725000	5715000	3379000	5246000	5071000		2013	67000	17000	351000	179000	122000		2013	5720000	5670000	3246000	5362000	4991000		5781000	5689000	3526000	5548000	5124000		5659000	5651000	2966000	5176000
2014	5754000	5701000	3195000	5306000	4993000		5799000	5716000	3525000	5496000	5090000		5709000	5686000	2865000	5116000	4896000		2014	5713000	5680000	3354000	5082000	4909000		2014	45000	15000	330000	190000	97000		2014	5754000	5700000	3185000	5306000	4994000		5797000	5716000	3448000	5496000	5091000		5711000	5684000	2922000	5116000
2015	5754000	5702000	3305000	5256000	5009000		5821000	5719000	3634000	5443000	5139000		5687000	5685000	2976000	5069000	4879000		2015	5732000	5672000	3371000	5161000	4923000		2015	67000	17000	329000	187000	130000		2015	5754000	5701000	3299000	5255000	5011000		5814000	5719000	3599000	5441000	5143000		5694000	5683000	2999000	5069000
[truncated: 13 more columns]

## Sheet: 03 Nordic recons
																			Temperature-based proxy - unadjusted								T-based CI - unadjusted
							Upper bound						Lower bound						Nordic, sea ice extent (million km2)								Nordic, sea ice extent (million km2)													Upper bound						Lower bound
Rescaled (unadjusted T)							Rescaled (unadjusted T)						Rescaled (unadjusted T)																				Rescaled (MW09-adjusted T)							Rescaled (MW09-adjusted T)						Rescaled (MW09-adjusted T)
Nordic, sea ice extent (million km2)							Nordic, sea ice extent (million km2)						Nordic, sea ice extent (million km2)						Year	winter	spring	summer	autumn	annual		Year	winter	spring	summer	autumn	annual		Nordic, sea ice extent (million km2)							Nordic, sea ice extent (million km2)						Nordic, sea ice extent (million km2)
Year	Winter	Spring	Summer	Autumn	Annual		Winter	Spring	Summer	Autumn	Annual		Winter	Spring	Summer	Autumn	Annual																Year	Winter	Spring	Summer	Autumn	Annual		Winter	Spring	Summer	Autumn	Annual		Winter	Spring	Summer	Autumn
1901	2723000	2423000	1371000	2473000	2181000		2978000	2742000	1513000	2741000	2372000		2468000	2104000	1229000	2205000	1990000		1901	2566000	2322000	1343000	2473000	2151000		1901	255000	319000	142000	268000	191000		1901	2764000	2488000	1415000	2487000	2256000		3032000	2802000	1546000	2738000	2445000		2496000	2174000	1284000	2236000
1902	3075000	2724000	1345000	2516000	2270000		3328000	3029000	1479000	2784000	2459000		2822000	2419000	1211000	2248000	2081000		1902	3323000	2878000	1327000	2516000	2626000		1902	253000	305000	134000	268000	189000		1902	3098000	2809000	1388000	2528000	2351000		3361000	3109000	1513000	2779000	2538000		2835000	2509000	1263000	2277000
1903	2547000	2536000	1367000	2135000	2195000		2801000	2841000	1509000	2403000	2385000		2293000	2231000	1225000	1867000	2005000		1903	2727000	2561000	1376000	2135000	2216000		1903	254000	305000	142000	268000	190000		1903	2597000	2608000	1411000	2168000	2271000		2860000	2909000	1543000	2418000	2460000		2334000	2307000	1279000	1918000
1904	2459000	2209000	1249000	2281000	1984000		2712000	2514000	1391000	2549000	2174000		2206000	1904000	1107000	2013000	1794000		1904	2711000	2165000	1250000	2281000	2149000		1904	253000	305000	142000	268000	190000		1904	2513000	2260000	1288000	2306000	2046000		2776000	2560000	1419000	2556000	2235000		2250000	1960000	1157000	2056000
1905	2899000	2523000	1312000	1982000	2167000		3153000	2828000	1454000	2251000	2357000		2645000	2218000	1170000	1713000	1977000		1905	2618000	2343000	1309000	1982000	2065000		1905	254000	305000	142000	269000	190000		1905	2931000	2595000	1354000	2023000	2240000		3194000	2896000	1485000	2274000	2429000		2668000	2294000	1223000	1772000
1906	2635000	2511000	1345000	2137000	2174000		2888000	2816000	1479000	2405000	2364000		2382000	2206000	1211000	1869000	1984000		1906	2757000	2352000	1396000	2137000	2203000		1906	253000	305000	134000	268000	190000		1906	2680000	2581000	1388000	2170000	2248000		2943000	2881000	1513000	2420000	2434000		2417000	2281000	1263000	1920000
1907	2679000	2423000	1323000	2312000	2131000		2932000	2728000	1464000	2580000	2321000		2426000	2118000	1182000	2044000	1941000		1907	2715000	2446000	1347000	2312000	2327000		1907	253000	305000	141000	268000	190000		1907	2722000	2488000	1365000	2335000	2202000		2985000	2789000	1496000	2586000	2391000		2459000	2187000	1234000	2084000
1908	2635000	2448000	1220000	2135000	2034000		2883000	2733000	1346000	2400000	2216000		2387000	2163000	1094000	1870000	1852000		1908	2755000	2467000	1301000	2135000	2196000		1908	248000	285000	126000	265000	182000		1908	2680000	2515000	1257000	2189000	2099000		2944000	2816000	1383000	2439000	2286000		2416000	2214000	1131000	1939000
1909	2679000	2599000	1341000	2168000	2199000		2927000	2884000	1467000	2433000	2381000		2431000	2314000	1215000	1903000	2017000		1909	2602000	2570000	1245000	2168000	2132000		1909	248000	285000	126000	265000	182000		1909	2722000	2675000	1384000	2191000	2275000		2985000	2975000	1509000	2439000	2462000		2459000	2375000	1259000	1943000
1910	2591000	2410000	1356000	2228000	2167000		2839000	2695000	1504000	2521000	2365000		2343000	2125000	1208000	1935000	1969000		1910	2487000	2651000	1343000	2228000	2137000		1910	248000	285000	148000	293000	198000		1910	2639000	2474000	1400000	2287000	2240000		2897000	2756000	1536000	2564000	2439000		2381000	2192000	1264000	2010000
1911	3163000	2825000	1341000	1851000	2302000		3430000	3153000	1489000	2117000	2501000		2896000	2497000	1193000	1585000	2103000		1911	2788000	2564000	1327000	1851000	2154000		1911	267000	328000	148000	266000	199000		1911	3182000	2916000	1384000	1904000	2385000		3464000	3239000	1520000	2156000	2584000		2900000	2593000	1248000	1652000
1912	3031000	2863000	1396000	2207000	2356000		3276000	3136000	1522000	2473000	2539000		2786000	2590000	1270000	1941000	2173000		1912	3144000	2437000	1396000	2207000	2273000		1912	245000	273000	126000	266000	183000		1912	3057000	2956000	1442000	2242000	2442000		3315000	3238000	1560000	2493000	2625000		2799000	2674000	1324000	1991000
1913	2547000	2586000	1492000	2180000	2331000		2795000	2851000	1616000	2440000	2511000		2299000	2321000	1368000	1920000	2151000		1913	2738000	2449000	1263000	2180000	2169000		1913	248000	265000	124000	260000	180000		1913	2597000	2662000	1543000	2205000	2416000		2854000	2944000	1661000	2453000	2596000		2340000	2380000	1425000	1957000
1914	2767000	2586000	1360000	1972000	2220000		3015000	2851000	1484000	2232000	2400000		2519000	2321000	1236000	1712000	2040000		1914	2937000	2739000	1417000	1972000	2300000		1914	248000	265000	124000	260000	180000		1914	2806000	2662000	1404000	1996000	2297000		3064000	2944000	1521000	2240000	2477000		2548000	2380000	1287000	1752000
1915	2415000	2548000	1378000	2526000	2199000		2659000	2821000	1502000	2771000	2380000		2171000	2275000	1254000	2281000	2018000		1915	2793000	2349000	1302000	2526000	2231000		1915	244000	273000	124000	245000	181000		1915	2472000	2622000	1423000	2526000	2275000		2729000	2904000	1540000	2756000	2456000		2215000	2340000	1306000	2296000
1916	2635000	2674000	1466000	2118000	2345000		2875000	2927000	1589000	2385000	2528000		2395000	2421000	1343000	1851000	2162000		1916	2576000	2745000	1401000	2118000	2117000		1916	240000	253000	123000	267000	183000		1916	2680000	2755000	1516000	2172000	2431000		2930000	3027000	1638000	2423000	2614000		2430000	2483000	1394000	1921000
1917	3338000	2976000	1448000	2339000	2463000		3591000	3247000	1572000	2588000	2646000		3085000	2705000	1324000	2090000	2280000		1917	3170000	2926000	1348000	2339000	2379000		1917	253000	271000	124000	249000	183000		1917	3349000	3076000	1496000	2370000	2557000		3617000	3369000	1617000	2606000	2740000		3081000	2783000	1375000	2134000
1918	2943000	2901000	1444000	1956000	2406000		3183000	3155000	1568000	2207000	2583000		2703000	2647000	1320000	1705000	2229000		1918	3082000	2594000	1517000	1956000	2307000		1918	240000	254000	124000	251000	177000		1918	2973000	2996000	1492000	2018000	2496000		3249000	3259000	1608000	2255000	2689000		2697000	2733000	1376000	1781000
1919	2591000	2586000	1326000	2390000	2174000		2831000	2854000	1456000	2625000	2359000		2351000	2318000	1196000	2155000	1989000		1919	3031000	2543000	1292000	2390000	2315000		1919	240000	268000	130000	235000	185000		1919	2639000	2662000	1369000	2417000	2248000		2893000	2939000	1489000	2636000	2430000		2385000	2385000	1249000	2198000
1920	2503000	2335000	1312000	1939000	2081000		2740000	2596000	1428000	2170000	2258000		2266000	2074000	1196000	1708000	1904000		1920	2531000	2053000	1206000	1939000	1934000		1920	237000	261000	116000	231000	177000		1920	2555000	2394000	1354000	1992000	2149000		2806000	2664000	1465000	2211000	2327000		2304000	2124000	1243000	1773000
1921	2591000	2372000	1293000	2242000	2081000		2809000	2618000	1406000	2461000	2240000		2373000	2126000	1180000	2023000	1922000		1921	2564000	1975000	1442000	2242000	2110000		1921	218000	246000	113000	219000	159000		1921	2639000	2434000	1334000	2292000	2149000		2881000	2704000	1447000	2510000	2320000		2397000	2164000	1221000	2074000
1922	2723000	2423000	1220000	1989000	2034000		2939000	2657000	1328000	2208000	2192000		2507000	2189000	1112000	1770000	1876000		1922	2538000	2298000	1279000	1989000	2035000		1922	216000	234000	108000	219000	158000		1922	2764000	2488000	1257000	2041000	2099000		3001000	2744000	1368000	2258000	2269000		2527000	2232000	1146000	1824000
1923	2503000	2435000	1293000	2003000	2092000		2720000	2657000	1400000	2211000	2255000		2286000	2213000	1186000	1795000	1929000		1923	2334000	2721000	1399000	2003000	2038000		1923	217000	222000	107000	208000	163000		1923	2555000	2501000	1334000	2055000	2160000		2792000	2741000	1440000	2249000	2334000		2318000	2261000	1228000	1861000
1924	2503000	2284000	1224000	1735000	1967000		2717000	2512000	1337000	1942000	2130000		2289000	2056000	1111000	1528000	1804000		1924	2626000	2703000	1286000	1735000	2063000		1924	214000	228000	113000	207000	163000		1924	2555000	2341000	1261000	1805000	2027000		2774000	2577000	1368000	1999000	2189000		2336000	2105000	1154000	1611000
1925	2415000	1982000	1216000	2394000	1877000		2633000	2205000	1318000	2602000	2026000		2197000	1759000	1114000	2186000	1728000		1925	2394000	2500000	1281000	2394000	2144000		1925	218000	223000	102000	208000	149000		1925	2472000	2020000	1253000	2429000	1932000		2695000	2249000	1351000	2623000	2082000		2249000	1791000	1155000	2235000
1926	2503000	2309000	1341000	2236000	2102000		2720000	2531000	1443000	2444000	2253000		2286000	2087000	1239000	2028000	1951000		1926	2440000	2464000	1468000	2236000	2151000		1926	217000	222000	102000	208000	151000		1926	2555000	2367000	1384000	2275000	2172000		2778000	2597000	1482000	2470000	2321000		2332000	2137000	1286000	2080000
1927	2503000	2460000	1352000	2256000	2156000		2721000	2682000	1456000	2464000	2306000		2285000	2238000	1248000	2048000	2006000		1927	2607000	2606000	1247000	2256000	2174000		1927	218000	222000	104000	208000	150000		1927	2555000	2528000	1396000	2324000	2229000		2778000	2758000	1494000	2533000	2393000		2332000	2298000	1298000	2115000
1928	2503000	2561000	1293000	2028000	2127000		2721000	2794000	1400000	2236000	2286000		2285000	2328000	1186000	1820000	1968000		1928	2434000	2618000	1335000	2028000	2090000		1928	218000	233000	107000	208000	159000		1928	2555000	2635000	1334000	2088000	2198000		2797000	2897000	1444000	2300000	2374000		2313000	2373000	1224000	1876000
1929	2767000	2699000	1319000	1758000	2199000		2988000	2922000	1426000	1965000	2359000		2546000	2476000	1212000	1551000	2039000		1929	2689000	2799000	1419000	1758000	2164000		1929	221000	223000	107000	207000	160000		1929	2806000	2782000	1361000	1813000	2275000		3054000	3030000	1472000	2007000	2453000		2558000	2534000	1250000	1619000
1930	2415000	2322000	1187000	2094000	1942000		2630000	2544000	1289000	2301000	2093000		2200000	2100000	1085000	1887000	1791000		1930	2558000	2398000	1304000	2094000	2077000		1930	215000	222000	102000	207000	151000		1930	2472000	2381000	1222000	2131000	2000000		2691000	2610000	1319000	2324000	2149000		2253000	2152000	1125000	1938000
1931	2459000	2096000	1216000	1818000	1917000		2667000	2303000	1316000	2029000	2068000		2251000	1889000	1116000	1607000	1766000		1931	2709000	2404000	1222000	1818000	2033000		1931	208000	207000	100000	211000	151000		1931	2513000	2140000	1253000	1877000	1974000		2743000	2369000	1355000	2094000	2139000		2283000	1911000	1151000	1660000
1932	2503000	2460000	1238000	1937000	2034000		2717000	2681000	1338000	2130000	2186000		2289000	2239000	1138000	1744000	1882000		1932	2402000	2434000	1217000	1937000	1993000		1932	214000	221000	100000	193000	152000		1932	2555000	2528000	1276000	1975000	2099000		2796000	2755000	1372000	2154000	2264000		2314000	2301000	1180000	1796000
1933	2415000	2058000	1220000	2065000	1906000		2622000	2262000	1317000	2258000	2049000		2208000	1854000	1123000	1872000	1763000		1933	2615000	2476000	1260000	2065000	2151000		1933	207000	204000	97000	193000	143000		1933	2472000	2100000	1257000	2096000	1962000		2682000	2317000	1350000	2275000	2105000		2262000	1883000	1164000	1917000
1934	3514000	2737000	1466000	1708000	2434000		3726000	2942000	1564000	1902000	2577000		3302000	2532000	1368000	1514000	2291000		1934	2243000	2425000	1240000	1708000	1887000		1934	212000	205000	98000	194000	143000		1934	3516000	2822000	1516000	1758000	2526000		3732000	3040000	1609000	1938000	2668000		3300000	2604000	1423000	1578000
1935	2767000	2460000	1326000	1824000	2142000		2974000	2663000	1420000	2017000	2279000		2560000	2257000	1232000	1631000	2005000		1935	2327000	2667000	1384000	1824000	2016000		1935	207000	203000	94000	193000	137000		1935	2806000	2528000	1369000	1869000	2214000		3017000	2736000	1458000	2049000	2353000		2595000	2320000	1280000	1689000
1936	2459000	2448000	1183000	1711000	1984000		2666000	2651000	1281000	1904000	2127000		2252000	2245000	1085000	1518000	1841000		1936	2926000	2078000	1207000	1711000	1993000		1936	207000	203000	98000	193000	143000		1936	2513000	2515000	1218000	1750000	2046000		2724000	2723000	1312000	1930000	2190000		2302000	2307000	1124000	1570000
1937	2547000	2335000	1293000	1912000	2067000		2759000	2546000	1391000	2111000	2210000		2335000	2124000	1195000	1713000	1924000		1937	2434000	2087000	1243000	1912000	1917000		1937	212000	211000	98000	199000	143000		1937	2597000	2394000	1334000	1936000	2134000		2813000	2611000	1427000	2120000	2278000		2381000	2177000	1241000	1752000
1938	2679000	2435000	1216000	1863000	2017000		2891000	2646000	1313000	2061000	2160000		2467000	2224000	1119000	1665000	1874000		1938	2296000	2292000	1155000	1863000	1865000		1938	212000	211000	97000	198000	143000		1938	2722000	2501000	1253000	1889000	2080000		2938000	2718000	1346000	2074000	2223000		2506000	2284000	1160000	1704000
1939	2503000	2247000	1268000	1900000	2013000		2715000	2458000	1366000	2098000	2155000		2291000	2036000	1170000	1702000	1871000		1939	2440000	2534000	1366000	1900000	2053000		1939	212000	211000	98000	198000	142000		1939	2555000	2301000	1307000	1940000	2076000		2771000	2518000	1401000	2140000	2232000		2339000	2084000	1213000	1740000
1940	3044000	2479000	1248000	2143000	2295000		3256000	2691000	1353000	2350000	2445000		2832000	2267000	1143000	1936000	2145000		1940	3044000	2479000	1248000	2143000	2295000		1940	212000	212000	105000	207000	150000		1940	3153000	2577000	1258000	2193000	2374000		3388000	2812000	1367000	2407000	2541000		2918000	2342000	1149000	1979000
1941	3088000	2775000	1274000	2242000	2386000		3300000	2991000	1371000	2429000	2528000		2876000	2559000	1177000	2055000	2244000		1941	3088000	2775000	1274000	2242000	2386000		1941	212000	216000	97000	187000	142000		1941	3181000	2857000	1315000	2261000	2475000		3417000	3098000	1413000	2436000	2630000		2945000	2616000	1217000	2086000
1942	3021000	2525000	1391000	2052000	2287000		3224000	2740000	1489000	2239000	2430000		2818000	2310000	1293000	1865000	2144000		1942	3021000	2525000	1391000	2052000	2287000		1942	203000	215000	98000	187000	143000		1942	3091000	2503000	1401000	2045000	2315000		3298000	2744000	1501000	2234000	2471000		2884000	2262000	1301000	1856000
1943	2549000	2295000	1307000	1741000	1961000		2751000	2498000	1401000	1929000	2097000		2347000	2092000	1213000	1553000	1825000		1943	2549000	2295000	1307000	1741000	1961000		1943	202000	203000	94000	188000	136000		1943	2522000	2253000	1299000	1745000	1909000		2753000	2471000	1392000	1927000	2063000		2291000	2035000	1206000	1563000
1944	2338000	2630000	1343000	1807000	1998000		2540000	2833000	1437000	1995000	2134000		2136000	2427000	1249000	1619000	1862000		1944	2338000	2630000	1343000	1807000	1998000		1944	202000	203000	94000	188000	136000		1944	2342000	2651000	1359000	1817000	1999000		2555000	2868000	1452000	1999000	2141000		2129000	2434000	1266000	1635000
1945	2555000	2519000	1268000	2201000	2142000		2756000	2721000	1362000	2388000	2277000		2354000	2317000	1174000	2014000	2007000		1945	2555000	2519000	1268000	2201000	2142000		1945	201000	202000	94000	187000	135000		1945	2592000	2558000	1286000	2203000	2171000		2806000	2766000	1376000	2378000	2313000		2378000	2350000	1196000	2028000
1946	2570000	2401000	1239000	1832000	1993000		2772000	2604000	1333000	2019000	2128000		2368000	2198000	1145000	1645000	1858000		1946	2576000	2567000	1266000	1832000	2033000		1946	202000	203000	94000	187000	135000		1946	2592000	2422000	1270000	1858000	2015000		2796000	2631000	1360000	2032000	2150000		2388000	2213000	1180000	1684000
1947	2529000	2140000	1279000	2026000	1978000		2731000	2343000	1373000	2213000	2114000		2327000	1937000	1185000	1839000	1842000		1947	2880000	2322000	1270000	2026000	2159000		1947	202000	203000	94000	187000	136000		1947	2548000	2161000	1305000	2037000	2000000		2752000	2369000	1395000	2212000	2136000		2344000	1953000	1215000	1862000
1948	2651000	2501000	1330000	1935000	2098000		2860000	2703000	1422000	2116000	2235000		2442000	2299000	1238000	1754000	1961000		1948	2518000	2346000	1412000	1935000	2048000		1948	209000	202000	92000	181000	137000		1948	2680000	2522000	1351000	1940000	2123000		2892000	2727000	1439000	2118000	2258000		2468000	2317000	1263000	1762000
1949	2651000	2681000	1416000	1982000	2214000		2834000	2862000	1500000	2153000	2337000		2468000	2500000	1332000	1811000	2091000		1949	2469000	2585000	1412000	1982000	2112000		1949	183000	181000	84000	171000	123000		1949	2680000	2702000	1429000	1994000	2243000		2875000	2896000	1512000	2160000	2372000		2485000	2508000	1346000	1828000
1950	2692000	2441000	1412000	1846000	2170000		2881000	2622000	1494000	2025000	2302000		2503000	2260000	1330000	1667000	2038000		1950	2533000	2331000	1347000	1846000	2026000		1950	189000	181000	82000	179000	132000		1950	2724000	2462000	1425000	1852000	2198000		2926000	2656000	1506000	2026000	2339000		2522000	2268000	1344000	1678000
1951	2489000	2521000	1401000	2050000	2156000		2652000	2681000	1475000	2209000	2271000		2326000	2361000	1327000	1891000	2041000		1951	2835000	2703000	1304000	2050000	2245000		1951	163000	160000	74000	159000	115000		1951	2504000	2542000	1415000	2060000	2183000		2675000	2712000	1486000	2207000	2303000		2333000	2372000	1344000	1913000
1952	2976000	2501000	1381000	2100000	2178000		3139000	2662000	1455000	2249000	2288000		2813000	2340000	1307000	1951000	2068000		1952	2613000	2585000	1435000	2100000	2201000		1952	163000	161000	74000	149000	110000		1952	3033000	2522000	1397000	2113000	2206000		3197000	2685000	1467000	2251000	2315000		2869000	2359000	1327000	1975000
1953	2695000	2583000	1382000	1919000	2145000		2855000	2741000	1456000	2068000	2255000		2535000	2425000	1308000	1770000	2035000		1953	2706000	2310000	1274000	1700000	1996000		1953	160000	158000	74000	149000	110000		1953	2713000	2603000	1385000	1936000	2161000		2874000	2763000	1457000	2074000	2275000		2552000	2443000	1313000	1798000
1954	2565000	2693000	1317000	1935000	2118000		2726000	2851000	1391000	2083000	2228000		2404000	2535000	1243000	1787000	2008000		1954	2516000	2295000	1315000	1849000	1993000		1954	161000	158000	74000	148000	110000		1954	2583000	2705000	1326000	1950000	2135000		2744000	2866000	1396000	2087000	2245000		2422000	2544000	1256000	1813000
1955	2638000	2748000	1312000	1911000	2136000		2798000	2906000	1385000	2060000	2246000		2478000	2590000	1239000	1762000	2026000		1955	2839000	2618000	1337000	2388000	2339000		1955	160000	158000	73000	149000	110000		1955	2656000	2756000	1321000	1929000	2153000		2817000	2916000	1391000	2066000	2262000		2495000	2596000	1251000	1792000
1956	2580000	2594000	1339000	1927000	2103000		2740000	2753000	1413000	2075000	2211000		2420000	2435000	1265000	1779000	1995000		1956	2646000	2663000	1519000	1954000	2221000		1956	160000	159000	74000	148000	108000		1956	2598000	2613000	1346000	1943000	2121000		2759000	2773000	1416000	2082000	2231000		2437000	2453000	1276000	1804000
1957	2363000	2484000	1263000	2119000	2059000		2523000	2643000	1336000	2268000	2169000		2203000	2325000	1190000	1970000	1949000		1957	2535000	2488000	1263000	2050000	2080000		1957	160000	159000	73000	149000	110000		1957	2381000	2511000	1277000	2110000	2078000		2542000	2671000	1347000	2248000	2188000		2220000	2351000	1207000	1972000
1958	2536000	2363000	1317000	2039000	2062000		2696000	2519000	1389000	2186000	2171000		2376000	2207000	1245000	1892000	1953000		1958	2811000	2670000	1393000	2022000	2258000		1958	160000	156000	72000	147000	109000		1958	2554000	2398000	1326000	2041000	2081000		2714000	2556000	1395000	2178000	2189000		2394000	2240000	1257000	1904000
1959	2666000	2572000	1371000	1991000	2157000		2826000	2729000	1444000	2139000	2266000		2506000	2415000	1298000	1843000	2048000		1959	2422000	2476000	1348000	1834000	1991000		1959	160000	157000	73000	148000	109000		1959	2684000	2592000	1375000	1999000	2173000		2844000	2751000	1444000	2135000	2281000		2524000	2433000	1306000	1863000
1960	2334000	2319000	1219000	1983000	1934000		2494000	2476000	1291000	2131000	2043000		2174000	2162000	1147000	1835000	1825000		1960	2751000	2162000	1227000	2028000	2060000		1960	160000	157000	72000	148000	109000		1960	2352000	2357000	1237000	1992000	1958000		2512000	2515000	1306000	2129000	2066000		2192000	2199000	1168000	1855000
1961	2652000	2660000	1377000	1887000	2142000		2811000	2816000	1449000	2034000	2251000		2493000	2504000	1305000	1740000	2033000		1961	2373000	2564000	1255000	1919000	1986000		1961	159000	156000	72000	147000	109000		1961	2670000	2674000	1380000	1909000	2158000		2830000	2841000	1449000	2045000	2270000		2510000	2507000	1311000	1773000
1962	2464000	2572000	1426000	2175000	2213000		2624000	2730000	1498000	2323000	2323000		2304000	2414000	1354000	2027000	2103000		1962	2647000	2476000	1429000	2046000	2156000		1962	160000	158000	72000	148000	110000		1962	2482000	2592000	1424000	2159000	2227000		2645000	2755000	1493000	2296000	2337000		2319000	2429000	1355000	2022000
1963	2941000	2561000	1463000	1999000	2263000		3101000	2718000	1537000	2147000	2372000		2781000	2404000	1389000	1851000	2154000		1963	3031000	2416000	1407000	2155000	2295000		1963	160000	157000	74000	148000	109000		1963	2959000	2582000	1459000	2006000	2276000		3123000	2767000	1539000	2169000	2405000		2795000	2397000	1379000	1843000
1964	2638000	2385000	1328000	2079000	2109000		2798000	2541000	1400000	2227000	2218000		2478000	2229000	1256000	1931000	2000000		1964	2476000	2591000	1411000	2110000	2142000		1964	160000	156000	72000	148000	109000		1964	2656000	2419000	1336000	2076000	2127000		2845000	2601000	1413000	2226000	2254000		2467000	2237000	1259000	1926000
1965	2797000	2517000	1491000	2135000	2287000		2957000	2674000	1564000	2282000	2396000		2637000	2360000	1418000	1988000	2178000		1965	2709000	2660000	1466000	2226000	2300000		1965	160000	157000	73000	147000	109000		1965	2815000	2541000	1483000	2124000	2299000		2996000	2699000	1554000	2268000	2432000		2634000	2383000	1412000	1980000
1966	3158000	2693000	1426000	2143000	2376000		3318000	2849000	1499000	2291000	2485000		2998000	2537000	1353000	1995000	2267000		1966	3359000	2679000	1420000	2236000	2502000		1966	160000	156000	73000	148000	109000		1966	3176000	2705000	1424000	2131000	2385000		3353000	2880000	1499000	2282000	2504000		2999000	2530000	1349000	1980000
1967	2753000	2374000	1436000	2351000	2290000		2913000	2530000	1508000	2499000	2399000		2593000	2218000	1364000	2203000	2181000		1967	2631000	2534000	1309000	2071000	2137000		1967	160000	156000	72000	148000	109000		1967	2771000	2408000	1434000	2312000	2301000		2947000	2575000	1503000	2449000	2419000		2595000	2241000	1365000	2175000
1968	3114000	2902000	1539000	2528000	2628000		3278000	3058000	1611000	2675000	2740000		2950000	2746000	1467000	2381000	2516000		1968	2959000	2845000	1532000	2432000	2497000		1968	164000	156000	72000	147000	112000		1968	3132000	2899000	1528000	2465000	2628000		3297000	3057000	1599000	2604000	2742000		2967000	2741000	1457000	2326000
1969	3360000	3056000	1534000	2191000	2593000		3524000	3212000	1606000	2339000	2705000		3196000	2900000	1462000	2043000	2481000		1969	3208000	2984000	1437000	2102000	2480000		1969	164000	156000	72000	148000	112000		1969	3378000	3043000	1523000	2173000	2594000		3547000	3202000	1592000	2310000	2709000		3209000	2884000	1454000	2036000
1970	2912000	2407000	1328000	2135000	2192000		3076000	2564000	1400000	2283000	2304000		2748000	2250000	1256000	1987000	2080000		1970	2795000	2642000	1386000	2083000	2243000		1970	164000	157000	72000	148000	112000		1970	2930000	2439000	1336000	2124000	2207000		3098000	2597000	1405000	2261000	2321000		2762000	2281000	1267000	1987000
1971	2782000	2572000	1355000	2279000	2278000		2944000	2731000	1429000	2430000	2389000		2620000	2413000	1281000	2128000	2167000		1971	2822000	2781000	1461000	2302000	2381000		1971	162000	159000	74000	151000	111000		1971	2800000	2592000	1360000	2250000	2290000		2962000	2752000	1430000	2392000	2401000		2638000	2432000	1290000	2108000
1972	2801000	2738000	1263000	1848000	2143000		2961000	2896000	1336000	1998000	2252000		2641000	2580000	1190000	1698000	2034000		1972	2416000	2522000	1306000	1914000	2021000		1972	160000	158000	73000	150000	109000		1972	2792000	2735000	1259000	1844000	2132000		2952000	2895000	1328000	1982000	2240000		2632000	2575000	1190000	1706000
1973	2622000	2429000	1425000	2359000	2237000		2784000	2587000	1499000	2509000	2347000		2460000	2271000	1351000	2209000	2127000		1973	2527000	2461000	1438000	2522000	2277000		1973	162000	158000	74000	150000	110000		1973	2617000	2421000	1418000	2324000	2228000		2779000	2581000	1488000	2466000	2339000		2455000	2261000	1348000	2182000
1974	2265000	2476000	1391000	1935000	2009000		2427000	2635000	1464000	2084000	2117000		2103000	2317000	1318000	1786000	1901000		1974	2262000	2337000	1261000	1974000	1942000		1974	162000	159000	73000	149000	108000		1974	2266000	2470000	1385000	1926000	1995000		2428000	2630000	1454000	2062000	2101000		2104000	2310000	1316000	1790000
1975	2573000	2357000	1467000	2234000	2180000		2735000	2523000	1540000	2384000	2293000		2411000	2191000	1394000	2084000	2067000		1975	2495000	2603000	1409000	2059000	2142000		1975	162000	166000	73000	150000	113000		1975	2569000	2349000	1460000	2207000	2170000		2731000	2517000	1530000	2345000	2283000		2407000	2181000	1390000	2069000
1976	2492000	2417000	1391000	2060000	2086000		2662000	2576000	1465000	2210000	2199000		2322000	2258000	1317000	1910000	1973000		1976	2658000	2488000	1361000	1991000	2137000		1976	170000	159000	74000	150000	113000		1976	2489000	2409000	1385000	2043000	2074000		2659000	2570000	1454000	2181000	2187000		2319000	2248000	1316000	1905000
1977	3044000	2857000	1399000	2097000	2391000		3216000	3019000	1484000	2247000	2521000		2872000	2695000	1314000	1947000	2261000		1977	2788000	2485000	1420000	2030000	2208000		1977	172000	162000	85000	150000	130000		1977	3031000	2856000	1393000	2078000	2386000		3201000	3016000	1473000	2216000	2514000		2861000	2696000	1313000	1940000
1978	2784000	2833000	1501000	2396000	2464000		2949000	2994000	1575000	2549000	2575000		2619000	2672000	1427000	2243000	2353000		1978	2831000	2772000	1486000	2318000	2398000		1978	165000	161000	74000	153000	111000		1978	2776000	2832000	1494000	2359000	2461000		2942000	2992000	1565000	2500000	2573000		2610000	2672000	1423000	2218000
1979	3019000	2800000	1388000	1996000	2324000	Satellite era	3188000	2964000	1463000	2149000	2435000		2850000	2636000	1313000	1843000	2213000		1979	3015000	2962000	1461000	2038000	2403000	Satellite era	1979	169000	164000	75000	153000	111000		1979	3016000	2794000	1383000	1985000	2320000	Satellite era	3183000	2957000	1454000	2127000	2430000		2849000	2631000	1312000	1843000
1980	2720000	2542000	1415000	2343000	2270000		2889000	2705000	1493000	2512000	2391000		2551000	2379000	1337000	2174000	2149000		1980	2631000	2407000	1430000	2366000	2250000		1980	169000	163000	78000	169000	121000		1980	2719000	2539000	1408000	2301000	2266000		2886000	2702000	1481000	2458000	2385000		2552000	2376000	1335000	2144000
1981	2784000	2815000	1479000	2263000	2358000		2982000	3003000	1562000	2445000	2495000		2586000	2627000	1396000	2081000	2221000		1981	2729000	2751000	1317000	2110000	2263000		1981	198000	188000	83000	182000	137000		1981	2783000	2808000	1469000	2228000	2353000		2979000	2996000	1549000	2396000	2488000		2587000	2620000	1389000	2060000
1982	2928000	2699000	1561000	2116000	2360000		3138000	2877000	1642000	2286000	2496000		2718000	2521000	1480000	1946000	2224000		1982	2778000	2688000	1475000	1962000	2228000		1982	210000	178000	81000	170000	136000		1982	2926000	2694000	1546000	2094000	2356000		3134000	2873000	1624000	2252000	2492000		2718000	2515000	1468000	1936000
1983	2560000	2425000	1310000	2146000	2110000		2758000	2603000	1391000	2314000	2239000		2362000	2247000	1229000	1978000	1981000		1983	2556000	2534000	1456000	2209000	2196000		1983	198000	178000	81000	168000	129000		1983	2560000	2424000	1309000	2121000	2109000		2756000	2603000	1386000	2280000	2241000		2364000	2245000	1232000	1962000
1984	2433000	2356000	1214000	1795000	1937000		2627000	2545000	1294000	1963000	2066000		2239000	2167000	1134000	1627000	1808000		1984	2325000	2325000	1402000	2048000	2011000		1984	194000	189000	80000	168000	129000		1984	2434000	2356000	1218000	1802000	1937000		2627000	2544000	1295000	1957000	2065000		2241000	2168000	1141000	1647000
1985	2563000	2626000	1227000	2046000	2109000		2747000	2802000	1307000	2214000	2232000		2379000	2450000	1147000	1878000	1986000		1985	2944000	2715000	1394000	2285000	2381000		1985	184000	176000	80000	168000	123000		1985	2562000	2622000	1230000	2031000	2108000		2744000	2798000	1307000	2186000	2231000		2380000	2446000	1153000	1876000
1986	2773000	2689000	1361000	2021000	2223000		2957000	2865000	1441000	2189000	2346000		2589000	2513000	1281000	1853000	2100000		1986	2640000	2528000	1573000	2137000	2263000		1986	184000	176000	80000	168000	123000		1986	2772000	2684000	1357000	2008000	2220000		2955000	2860000	1434000	2163000	2343000		2589000	2508000	1280000	1853000
1987	2779000	2679000	1395000	1995000	2227000		2960000	2850000	1473000	2167000	2349000		2598000	2508000	1317000	1823000	2105000		1987	2809000	2558000	1473000	2168000	2280000		1987	181000	171000	78000	172000	122000		1987	2778000	2674000	1389000	1984000	2224000		2957000	2846000	1464000	2143000	2345000		2599000	2502000	1314000	1825000
1988	2770000	2690000	1433000	2423000	2347000		2951000	2870000	1518000	2597000	2483000		2589000	2510000	1348000	2249000	2211000		1988	2611000	2621000	1256000	2236000	2174000		1988	181000	180000	85000	174000	136000		1988	2769000	2685000	1425000	2373000	2343000		2948000	2865000	1507000	2533000	2479000		2590000	2505000	1343000	2213000
1989	2798000	2390000	1492000	2180000	2238000		2988000	2570000	1574000	2360000	2374000		2608000	2210000	1410000	2000000	2102000		1989	2451000	2180000	1330000	2079000	2018000		1989	190000	180000	82000	180000	136000		1989	2797000	2389000	1481000	2152000	2235000		2996000	2569000	1560000	2327000	2370000		2598000	2209000	1402000	1977000
1990	2596000	2380000	1325000	1998000	2077000		2800000	2582000	1414000	2203000	2232000		2392000	2178000	1236000	1793000	1922000		1990	2413000	2410000	1302000	1931000	2063000		1990	204000	202000	89000	205000	155000		1990	2596000	2380000	1323000	1987000	2076000		2804000	2581000	1409000	2178000	2225000		2388000	2179000	1237000	1796000
1991	2491000	2403000	1269000	2012000	2038000		2678000	2583000	1355000	2171000	2174000		2304000	2223000	1183000	1853000	1902000		1991	2393000	2546000	1268000	1947000	2003000		1991	187000	180000	86000	159000	136000		1991	2492000	2402000	1270000	2000000	2037000		2675000	2578000	1349000	2145000	2168000		2309000	2226000	1191000	1855000
1992	2508000	2303000	1426000	2000000	2066000		2685000	2483000	1514000	2158000	2201000		2331000	2123000	1338000	1842000	1931000		1992	2498000	2546000	1443000	2118000	2159000		1992	177000	180000	88000	158000	135000		1992	2508000	2303000	1418000	1989000	2065000		2683000	2483000	1502000	2136000	2197000		2333000	2123000	1334000	1842000
1993	2488000	2421000	1479000	2017000	2112000		2663000	2601000	1564000	2175000	2239000		2313000	2241000	1394000	1859000	1985000		1993	2702000	2609000	1425000	2036000	2213000		1993	175000	180000	85000	158000	127000		1993	2488000	2420000	1469000	2005000	2111000		2660000	2595000	1551000	2156000	2239000		2316000	2245000	1387000	1854000
1994	2522000	2432000	1311000	2076000	2084000		2697000	2609000	1398000	2234000	2211000		2347000	2255000	1224000	1918000	1957000		1994	2698000	2425000	1363000	2061000	2159000		1994	175000	177000	87000	158000	127000		1994	2522000	2430000	1310000	2058000	2082000		2699000	2609000	1397000	2209000	2218000		2345000	2251000	1223000	1907000
1995	2417000	2167000	1330000	2124000	2005000		2594000	2353000	1417000	2287000	2140000		2240000	1981000	1243000	1961000	1870000		1995	2735000	2434000	1358000	2166000	2223000		1995	177000	186000	87000	163000	135000		1995	2418000	2170000	1328000	2101000	2005000		2596000	2350000	1409000	2254000	2142000		2240000	1990000	1247000	1948000
1996	2598000	2500000	1285000	2032000	2103000		2777000	2677000	1370000	2222000	2248000		2419000	2323000	1200000	1842000	1958000		1996	2374000	2467000	1274000	2112000	2085000		1996	179000	177000	85000	190000	145000		1996	2598000	2498000	1285000	2018000	2102000		2774000	2670000	1362000	2190000	2242000		2422000	2326000	1208000	1846000
1997	2817000	2645000	1406000	2149000	2272000		3004000	2822000	1495000	2323000	2415000		2630000	2468000	1317000	1975000	2129000		1997	2693000	2576000	1319000	1861000	2122000		1997	187000	177000	89000	174000	143000		1997	2816000	2641000	1400000	2124000	2268000		2998000	2813000	1482000	2283000	2404000		2634000	2469000	1318000	1965000
1998	2839000	2694000	1429000	2091000	2284000		3014000	2874000	1516000	2264000	2418000		2664000	2514000	1342000	1918000	2150000		1998	2775000	2615000	1347000	1985000	2174000		1998	175000	180000	87000	173000	134000		1998	2837000	2689000	1422000	2072000	2280000		3017000	2868000	1502000	2234000	2412000		2657000	2510000	1342000	1910000
1999	2527000	2516000	1300000	1861000	2049000		2710000	2698000	1387000	2027000	2185000		2344000	2334000	1213000	1695000	1913000		1999	2704000	2440000	1314000	1925000	2077000		1999	183000	182000	87000	166000	136000		1999	2527000	2514000	1299000	1862000	2048000		2709000	2689000	1378000	2016000	2177000		2345000	2339000	1220000	1708000
2000	2385000	2285000	1312000	1798000	1938000		2568000	2468000	1399000	1965000	2071000		2202000	2102000	1225000	1631000	1805000		2000	2533000	2500000	1265000	1774000	1993000		2000	183000	183000	87000	167000	133000		2000	2386000	2286000	1310000	1804000	1938000		2566000	2462000	1390000	1957000	2066000		2206000	2110000	1230000	1651000
2001	2572000	2499000	1188000	1883000	2026000		2789000	2702000	1285000	2094000	2186000		2355000	2296000	1091000	1672000	1866000		2001	2669000	2485000	1240000	1842000	2055000		2001	217000	203000	97000	211000	160000		2001	2572000	2497000	1194000	1882000	2026000		2787000	2697000	1287000	2074000	2181000		2357000	2297000	1101000	1690000
2002	2545000	2364000	1158000	1926000	1985000		2763000	2570000	1253000	2117000	2142000		2327000	2158000	1063000	1735000	1828000		2002	2613000	2108000	1204000	1867000	1934000		2002	218000	206000	95000	191000	157000		2002	2545000	2364000	1165000	1922000	1985000		2760000	2570000	1256000	2098000	2140000		2330000	2158000	1074000	1746000
2003	2558000	2450000	1319000	2002000	2083000		2774000	2650000	1417000	2202000	2233000		2342000	2250000	1221000	1802000	1933000		2003	2400000	2310000	1089000	1793000	1872000		2003	216000	200000	98000	200000	150000		2003	2558000	2449000	1317000	1990000	2081000		2770000	2648000	1411000	2175000	2229000		2346000	2250000	1223000	1805000
2004	2569000	2270000	1151000	1822000	1940000		2786000	2477000	1248000	2022000	2089000		2352000	2063000	1054000	1622000	1791000		2004	2340000	2183000	1142000	1908000	1858000		2004	217000	207000	97000	200000	149000		2004	2569000	2271000	1158000	1827000	1940000		2784000	2478000	1257000	2012000	2093000		2354000	2064000	1059000	1642000
2005	2377000	2336000	1232000	1824000	1929000		2593000	2548000	1327000	2019000	2073000		2161000	2124000	1137000	1629000	1785000		2005	2243000	2262000	1219000	1560000	1774000		2005	216000	212000	95000	195000	144000		2005	2378000	2336000	1235000	1828000	1929000		2592000	2549000	1328000	2009000	2073000		2164000	2123000	1142000	1647000
2006	2310000	2008000	1194000	1717000	1788000		2521000	2213000	1286000	1914000	1937000		2099000	1803000	1102000	1520000	1639000		2006	2522000	2114000	1217000	1774000	1885000		2006	211000	205000	92000	197000	149000		2006	2311000	2013000	1199000	1731000	1790000		2519000	2219000	1295000	1913000	1945000		2103000	1807000	1103000	1549000
2007	2276000	2079000	1267000	1720000	1821000		2492000	2306000	1360000	1927000	1980000		2060000	1852000	1174000	1513000	1662000		2007	2303000	2217000	1229000	1667000	1808000		2007	216000	227000	93000	207000	159000		2007	2278000	2083000	1268000	1734000	1822000		2491000	2311000	1359000	1925000	1978000		2065000	1855000	1177000	1543000
2008	2251000	2178000	1253000	1804000	1855000		2479000	2371000	1351000	1995000	2024000		2023000	1985000	1155000	1613000	1686000		2008	2294000	2340000	1238000	1667000	1825000		2008	228000	193000	98000	191000	169000		2008	2252000	2180000	1255000	1810000	1856000		2476000	2371000	1349000	1985000	2022000		2028000	1989000	1161000	1635000
2009	2362000	2294000	1256000	1693000	1889000		2562000	2501000	1348000	1876000	2042000		2162000	2087000	1164000	1510000	1736000		2009	2429000	2262000	1199000	1945000	1942000		2009	200000	207000	92000	183000	153000		2009	2363000	2294000	1258000	1709000	1890000		2561000	2500000	1349000	1878000	2045000		2165000	2088000	1167000	1540000
2010	2424000	2324000	1203000	1887000	1945000		2624000	2513000	1295000	2068000	2086000		2224000	2135000	1111000	1706000	1804000		2010	2598000	2084000	1192000	1987000	2006000		2010	200000	189000	92000	181000	141000		2010	2425000	2324000	1207000	1886000	1946000		2622000	2512000	1295000	2053000	2084000		2228000	2136000	1119000	1719000
2011	2401000	2194000	1264000	1686000	1876000		2603000	2384000	1349000	1868000	2014000		2199000	2004000	1179000	1504000	1738000		2011	2458000	2011000	1212000	1568000	1796000		2011	202000	190000	85000	182000	138000		2011	2402000	2196000	1265000	1703000	1877000		2601000	2388000	1347000	1871000	2015000		2203000	2004000	1183000	1535000
2012	2140000	2099000	1176000	1616000	1731000		2379000	2302000	1299000	1823000	1922000		1901000	1896000	1053000	1409000	1540000		2012	2225000	2238000	1271000	1910000	1917000		2012	239000	203000	123000	207000	191000		2012	2142000	2102000	1182000	1639000	1733000		2402000	2304000	1318000	1830000	1953000		1882000	1900000	1046000	1448000
2013	2317000	2241000	1066000	1736000	1811000		2520000	2452000	1164000	1960000	1975000		2114000	2030000	968000	1512000	1647000		2013	2529000	2111000	1143000	1729000	1872000		2013	203000	211000	98000	224000	164000		2013	2318000	2243000	1078000	1748000	1813000		2520000	2455000	1182000	1953000	1990000		2116000	2031000	974000	1543000
2014	2204000	2153000	1269000	1862000	1855000		2468000	2364000	1363000	2063000	2031000		1940000	1942000	1175000	1661000	1679000		2014	2083000	2232000	1201000	1754000	1712000		2014	264000	211000	94000	201000	176000		2014	2206000	2155000	1270000	1863000	1856000		2465000	2367000	1367000	2052000	2033000		1947000	1943000	1173000	1674000
2015	2323000	2005000	1216000	1535000	1752000		2555000	2213000	1305000	1741000	1916000		2091000	1797000	1127000	1329000	1588000		2015	2229000	2147000	1309000	1661000	1803000		2015	232000	208000	89000	206000	164000		2015	2324000	2009000	1220000	1566000	1754000		2554000	2228000	1307000	1755000	1924000		2094000	1790000	1133000	1377000
[truncated: 13 more columns]

## Sheet: 04 Siberian recons
																						Temperature-based proxy - unadjusted								T-based CI - unadjusted
								Upper bound							Lower bound							Siberian, sea ice extent (million km2)								Siberian, sea ice extent (million km2)														Upper bound
Rescaled (unadjusted T)								Rescaled (unadjusted T)							Rescaled (unadjusted T)																					Rescaled (MW09-adjusted T)								Rescaled (MW09-adjusted T)
Siberian (AARI)								Siberian (AARI)							Siberian (AARI)							Year	winter	spring	summer	autumn	annual		Year	winter	spring	summer	autumn	annual		Siberian (AARI)								Siberian (AARI)
Year	Winter	Spring	Summer	Autumn	Annual	Frolov		Winter	Spring	Summer	Autumn	Annual	Frolov		Winter	Spring	Summer	Autumn	Annual	Frolov																Year	Winter	Spring	Summer	Autumn	Annual	Frolov		Winter	Spring	Summer	Autumn	Annual	Frolov
1900	4459000	4459000	3810000	4450000	4359000	3322000																1900	4459000	4459000	3810000	4450000	4359000		1900	0	1000	549000	57000	175000		1900	4459000	4459000	3701000	4443000	4397000	3597000
1901	4459000	4458000	3976000	4402000	4308000	3548000		4460000	4459000	4524000	4460000	4439000	4096000		4458000	4457000	3428000	4344000	4177000	3000000		1901	4459000	4458000	3976000	4402000	4308000		1901	1000	1000	548000	58000	131000		1901	4459000	4458000	3853000	4398000	4289000	3740000		4459000	4459000	4350000	4452000	4418000	4237000
1902	4459000	4459000	4019000	4506000	4475000	3466000		4460000	4460000	4568000	4564000	4620000	4015000		4458000	4458000	3470000	4448000	4330000	2917000		1902	4459000	4459000	4019000	4506000	4475000		1902	1000	1000	549000	58000	145000		1902	4459000	4459000	3893000	4497000	4461000	3688000		4459000	4460000	4389000	4551000	4603000	4184000
1903	4459000	4459000	3616000	4433000	4337000	3551000		4459000	4460000	4164000	4490000	4467000	4099000		4459000	4458000	3068000	4376000	4207000	3003000		1903	4459000	4459000	3616000	4433000	4337000		1903	0	1000	548000	57000	130000		1903	4459000	4459000	3526000	4427000	4316000	3742000		4459000	4460000	4023000	4481000	4446000	4239000
1904	4459000	4459000	3806000	4427000	4275000	3648000		4459000	4460000	4452000	4484000	4430000	4294000		4459000	4458000	3160000	4370000	4120000	3002000		1904	4459000	4459000	3806000	4427000	4275000		1904	0	1000	646000	57000	155000		1904	4459000	4458000	3553000	4421000	4219000	3804000		4459000	4460000	4124000	4475000	4368000	4375000
1905	4459000	4459000	4121000	4500000	4378000	3460000		4459000	4460000	4670000	4579000	4554000	4009000		4459000	4458000	3572000	4421000	4202000	2911000		1905	4459000	4459000	4121000	4500000	4378000		1905	0	1000	549000	79000	176000		1905	4459000	4459000	3984000	4491000	4420000	3684000		4459000	4461000	4480000	4566000	4676000	4180000
1906	4459000	4458000	3373000	4389000	4313000	3856000		4460000	4459000	4113000	4447000	4568000	4596000		4458000	4457000	2633000	4331000	4058000	3116000		1906	4459000	4458000	3373000	4389000	4313000		1906	1000	1000	740000	58000	255000		1906	4459000	4457000	3086000	4385000	4198000	3936000		4459000	4459000	3746000	4440000	4429000	4596000
1907	4459000	4458000	3840000	4493000	4360000	3380000		4459000	4459000	4388000	4550000	4490000	3928000		4459000	4457000	3292000	4436000	4230000	2832000		1907	4459000	4458000	3840000	4493000	4360000		1907	0	1000	548000	57000	130000		1907	4459000	4458000	3731000	4484000	4341000	3633000		4459000	4459000	4228000	4539000	4470000	4130000
1908	4459000	4459000	3232000	4456000	4352000	3151000		4459000	4460000	3873000	4513000	4608000	3792000		4459000	4458000	2591000	4399000	4096000	2510000		1908	4459000	4459000	3232000	4456000	4352000		1908	0	1000	641000	57000	256000		1908	4459000	4458000	3330000	4448000	4340000	3487000		4459000	4460000	3921000	4503000	4592000	4078000
1909	4459000	4458000	3290000	4419000	4318000	3602000		4459000	4460000	3839000	4484000	4470000	4151000		4459000	4456000	2741000	4354000	4166000	3053000		1909	4459000	4458000	3290000	4419000	4318000		1909	0	2000	549000	65000	152000		1909	4459000	4459000	3239000	4421000	4334000	3775000		4459000	4460000	3735000	4483000	4489000	4271000
1910	4459000	4459000	3286000	4481000	4383000	3500000		4460000	4460000	3932000	4548000	4538000	4146000		4458000	4458000	2640000	4414000	4228000	2854000		1910	4459000	4459000	3286000	4481000	4383000		1910	1000	1000	646000	67000	155000		1910	4459000	4459000	3086000	4465000	4326000	3710000		4459000	4460000	3657000	4529000	4476000	4281000
1911	4459000	4458000	3499000	4435000	4217000	3236000		4459000	4460000	4779000	4517000	4472000	4516000		4459000	4456000	2219000	4353000	3962000	1956000		1911	4459000	4458000	3499000	4435000	4217000		1911	0	2000	1280000	82000	255000		1911	4459000	4458000	3452000	4429000	4203000	3542000		4459000	4460000	4563000	4507000	4456000	4653000
1912	4459000	4457000	4675000	4499000	4482000	4377000		4460000	4459000	5496000	4566000	4663000	5198000		4458000	4455000	3854000	4432000	4301000	3556000		1912	4459000	4457000	4675000	4499000	4482000		1912	1000	2000	821000	67000	181000		1912	4459000	4457000	4285000	4482000	4414000	4268000		4459000	4459000	4991000	4546000	4584000	4974000
1913	4459000	4458000	4053000	4446000	4406000	3352000		4460000	4460000	4792000	4529000	4661000	4091000		4458000	4456000	3314000	4363000	4151000	2613000		1913	4459000	4458000	4053000	4446000	4406000		1913	1000	2000	739000	83000	255000		1913	4459000	4459000	3949000	4441000	4394000	3615000		4459000	4460000	4599000	4520000	4647000	4265000
1914	4459000	4458000	3392000	4412000	4202000	3812000		4459000	4459000	4033000	4469000	4354000	4453000		4459000	4457000	2751000	4355000	4050000	3171000		1914	4459000	4458000	3392000	4412000	4202000		1914	0	1000	641000	57000	152000		1914	4459000	4458000	3474000	4407000	4217000	3909000		4459000	4459000	4065000	4461000	4373000	4500000
1915	4459000	4458000	3932000	4507000	4508000	2892000		4460000	4459000	4578000	4564000	4689000	3538000		4458000	4457000	3286000	4450000	4327000	2246000		1915	4459000	4458000	3932000	4507000	4508000		1915	1000	1000	646000	57000	181000		1915	4459000	4457000	3666000	4498000	4441000	3323000		4459000	4459000	4237000	4552000	4611000	3894000
1916	4459000	4460000	3733000	4520000	4458000	3516000		4459000	4461000	4281000	4572000	4588000	4064000		4459000	4459000	3185000	4468000	4328000	2968000		1916	4459000	4460000	3733000	4520000	4458000		1916	0	1000	548000	52000	130000		1916	4459000	4460000	3631000	4512000	4438000	3720000		4459000	4461000	4127000	4566000	4568000	4216000
1917	4459000	4457000	3835000	4455000	4253000	3374000		4459000	4458000	4340000	4507000	4373000	3879000		4459000	4456000	3330000	4403000	4133000	2869000		1917	4459000	4457000	3835000	4455000	4253000		1917	0	1000	505000	52000	120000		1917	4459000	4457000	3662000	4448000	4202000	3629000		4459000	4458000	4158000	4503000	4331000	4125000
1918	4459000	4459000	3582000	4483000	4357000	3227000		4459000	4460000	4087000	4535000	4478000	3732000		4459000	4458000	3077000	4431000	4236000	2722000		1918	4459000	4459000	3582000	4483000	4357000		1918	0	1000	505000	52000	121000		1918	4459000	4459000	3588000	4479000	4361000	3536000		4459000	4460000	4044000	4528000	4478000	3992000
1919	4459000	4459000	3519000	4408000	4264000	3786000		4460000	4460000	4097000	4488000	4463000	4364000		4458000	4458000	2941000	4328000	4065000	3208000		1919	4459000	4459000	3519000	4408000	4264000		1919	1000	1000	578000	80000	199000		1919	4459000	4459000	3561000	4416000	4313000	3892000		4459000	4460000	4078000	4490000	4499000	4409000
1920	4459000	4458000	3796000	4485000	4283000	3433000		4459000	4459000	4344000	4549000	4427000	3981000		4459000	4457000	3248000	4421000	4139000	2885000		1920	4459000	4458000	3796000	4485000	4283000		1920	0	1000	548000	64000	144000		1920	4459000	4458000	3801000	4485000	4290000	3667000		4459000	4459000	4297000	4545000	4432000	4163000
1921	4459000	4458000	3504000	4396000	4158000	3817000		4459000	4459000	4010000	4448000	4289000	4323000		4459000	4457000	2998000	4344000	4027000	3311000		1921	4459000	4458000	3504000	4396000	4158000		1921	0	1000	506000	52000	131000		1921	4459000	4458000	3609000	4401000	4165000	3911000		4459000	4459000	4066000	4450000	4295000	4368000
1922	4459000	4457000	3023000	4423000	4214000	3071000		4459000	4458000	3529000	4475000	4335000	3577000		4459000	4456000	2517000	4371000	4093000	2565000		1922	4459000	4457000	3023000	4423000	4214000		1922	0	1000	506000	52000	121000		1922	4459000	4457000	3178000	4427000	4241000	3436000		4459000	4458000	3635000	4476000	4358000	3893000
1923	4459000	4459000	3038000	4402000	4232000	3474000		4459000	4460000	3543000	4459000	4364000	3979000		4459000	4458000	2533000	4345000	4100000	2969000		1923	4459000	4459000	3038000	4402000	4232000		1923	0	1000	505000	57000	132000		1923	4459000	4459000	3191000	4410000	4271000	3693000		4459000	4460000	3648000	4463000	4398000	4150000
1924	4459000	4458000	3179000	4338000	4106000	4101000		4459000	4459000	3757000	4395000	4237000	4679000		4459000	4457000	2601000	4281000	3975000	3523000		1924	4459000	4458000	3179000	4338000	4106000		1924	0	1000	578000	57000	131000		1924	4459000	4458000	3374000	4348000	4144000	4092000		4459000	4459000	3891000	4401000	4271000	4609000
1925	4459000	4459000	4248000	4408000	4285000	3966000		4459000	4460000	4753000	4465000	4416000	4471000		4459000	4458000	3743000	4351000	4154000	3461000		1925	4459000	4459000	4248000	4408000	4285000		1925	0	1000	505000	57000	131000		1925	4459000	4459000	4198000	4410000	4303000	4006000		4459000	4460000	4655000	4463000	4430000	4463000
1926	4459000	4459000	3354000	4414000	4209000	3926000		4459000	4460000	4046000	4461000	4425000	4618000		4459000	4458000	2662000	4367000	3993000	3234000		1926	4459000	4459000	3354000	4414000	4209000		1926	0	1000	692000	47000	216000		1926	4459000	4459000	3588000	4416000	4301000	3981000		4459000	4460000	4210000	4460000	4507000	4603000
1927	4459000	4458000	3392000	4386000	4225000	3942000		4459000	4458000	3852000	4433000	4335000	4402000		4459000	4458000	2932000	4339000	4115000	3482000		1927	4459000	4458000	3392000	4386000	4225000		1927	0	0	460000	47000	110000		1927	4459000	4458000	3479000	4390000	4243000	3991000		4459000	4459000	3887000	4434000	4348000	4399000
1928	4459000	4458000	3509000	4440000	4264000	4505000		4459000	4459000	3969000	4482000	4374000	4965000		4459000	4457000	3049000	4398000	4154000	4045000		1928	4459000	4458000	3509000	4440000	4264000		1928	0	1000	460000	42000	110000		1928	4459000	4458000	3579000	4441000	4281000	4349000		4459000	4459000	3988000	4480000	4386000	4758000
1929	4459000	4458000	3927000	4444000	4312000	4115000		4459000	4459000	4239000	4479000	4402000	4427000		4459000	4457000	3615000	4409000	4222000	3803000		1929	4459000	4458000	3927000	4444000	4312000		1929	0	1000	312000	35000	90000		1929	4459000	4459000	3954000	4441000	4324000	4101000		4459000	4459000	4232000	4475000	4414000	4379000
1930	4459000	4458000	3679000	4426000	4261000	3935000		4459000	4459000	4005000	4462000	4343000	4261000		4459000	4457000	3353000	4390000	4179000	3609000		1930	4459000	4458000	3679000	4426000	4261000		1930	0	1000	326000	36000	82000		1930	4459000	4458000	3740000	4429000	4280000	3987000		4459000	4459000	4032000	4462000	4360000	4279000
1931	4459000	4458000	3373000	4414000	4276000	3828000		4459000	4459000	3727000	4447000	4372000	4182000		4459000	4457000	3019000	4381000	4180000	3474000		1931	4459000	4458000	3373000	4414000	4276000		1931	0	1000	354000	33000	96000		1931	4459000	4459000	3444000	4417000	4286000	3918000		4459000	4459000	3757000	4448000	4378000	4231000
1932	4459000	4458000	3111000	4456000	4235000	3130000		4459000	4458000	3452000	4488000	4327000	3471000		4459000	4458000	2770000	4424000	4143000	2789000		1932	4459000	4458000	3111000	4456000	4235000		1932	0	0	341000	32000	92000		1932	4459000	4458000	3234000	4457000	4245000	3474000		4459000	4458000	3542000	4487000	4334000	3782000
1933	4459000	4458000	3788000	4431000	4308000	4048000		4459000	4459000	4087000	4461000	4405000	4347000		4459000	4457000	3489000	4401000	4211000	3749000		1933	4459000	4458000	3854000	4431000	4308000		1933	0	1000	299000	30000	97000		1933	4459000	4459000	3788000	4429000	4320000	4048000		4459000	4459000	4050000	4457000	4413000	4310000
1934	4459000	4458000	3934000	4390000	4156000	3795000		4459000	4459000	4234000	4422000	4240000	4095000		4459000	4457000	3634000	4358000	4072000	3495000		1934	4459000	4458000	3830000	4390000	4156000		1934	0	1000	300000	32000	84000		1934	4459000	4458000	3934000	4393000	4165000	3795000		4459000	4459000	4199000	4422000	4245000	4060000
1935	4459000	4458000	3767000	4434000	4202000	3638000		4459000	4459000	4065000	4465000	4290000	3936000		4459000	4457000	3469000	4403000	4114000	3340000		1935	4459000	4458000	3412000	4434000	4202000		1935	0	1000	298000	31000	88000		1935	4459000	4458000	3767000	4434000	4219000	3638000		4459000	4459000	4033000	4464000	4302000	3904000
1936	4459000	4457000	3918000	4401000	4219000	4008000		4459000	4458000	4145000	4426000	4287000	4235000		4459000	4456000	3691000	4376000	4151000	3781000		1936	4459000	4457000	3169000	4401000	4219000		1936	0	1000	227000	25000	68000		1936	4459000	4457000	3918000	4454000	4232000	4008000		4459000	4458000	4124000	4478000	4297000	4214000
1937	4459000	4458000	3812000	4378000	4155000	3463000		4459000	4458000	4045000	4403000	4221000	3696000		4459000	4458000	3579000	4353000	4089000	3230000		1937	4459000	4458000	3563000	4378000	4155000		1937	0	0	233000	25000	66000		1937	4459000	4458000	3812000	4432000	4178000	3463000		4459000	4459000	4018000	4457000	4247000	3669000
1938	4459000	4457000	3796000	4432000	4142000	3413000		4459000	4457000	4032000	4458000	4208000	3649000		4459000	4457000	3560000	4406000	4076000	3177000		1938	4459000	4457000	3329000	4432000	4142000		1938	0	0	236000	26000	66000		1938	4459000	4457000	3796000	4434000	4162000	3413000		4459000	4458000	4009000	4458000	4226000	3626000
1939	4459000	4458000	3780000	4394000	4200000	3672000		4459000	4458000	4006000	4418000	4262000	3898000		4459000	4458000	3554000	4370000	4138000	3446000		1939	4459000	4458000	3655000	4394000	4200000		1939	0	0	226000	24000	62000		1939	4459000	4458000	3780000	4397000	4216000	3672000		4459000	4458000	3978000	4420000	4277000	3870000
1940	4459000	4459000	3566000	4462000	4240000	3359000		4459000	4459000	3792000	4487000	4303000	3585000		4459000	4459000	3340000	4437000	4177000	3133000		1940	4459000	4457000	3582000	4462000	4240000		1940	0	0	226000	25000	63000		1940	4459000	4459000	3566000	4464000	4255000	3359000		4459000	4459000	3765000	4487000	4316000	3558000
1941	4459000	4458000	3284000	4447000	4329000	3450000		4459000	4458000	3507000	4471000	4388000	3673000		4459000	4458000	3061000	4423000	4270000	3227000		1941	4459000	4458000	3217000	4447000	4329000		1941	0	0	223000	24000	59000		1941	4459000	4458000	3284000	4448000	4350000	3450000		4459000	4458000	3479000	4471000	4408000	3645000
1942	4459000	4459000	3568000	4410000	4233000	3664000		4459000	4459000	3790000	4435000	4294000	3886000		4459000	4459000	3346000	4385000	4172000	3442000		1942	4459000	4458000	3572000	4410000	4233000		1942	0	0	222000	25000	61000		1942	4459000	4459000	3568000	4411000	4245000	3664000		4459000	4459000	3762000	4435000	4304000	3858000
1943	4459000	4458000	3089000	4411000	4104000	3159000		4459000	4459000	3309000	4436000	4164000	3379000		4459000	4457000	2869000	4386000	4044000	2939000		1943	4459000	4456000	3417000	4413000	4062000		1943	0	1000	220000	25000	60000		1943	4459000	4458000	3089000	4411000	4104000	3159000		4459000	4458000	3283000	4434000	4163000	3353000
1944	4458000	4459000	3642000	4439000	4250000	3557000		4458000	4459000	3887000	4463000	4310000	3802000		4458000	4459000	3397000	4415000	4190000	3312000		1944	4459000	4458000	3412000	4394000	4162000		1944	0	0	245000	24000	60000		1944	4458000	4459000	3642000	4439000	4250000	3557000		4458000	4460000	3860000	4462000	4310000	3775000
1945	4459000	4458000	3276000	4355000	4137000	3064000		4459000	4458000	3505000	4379000	4197000	3293000		4459000	4458000	3047000	4331000	4077000	2835000		1945	4459000	4457000	3354000	4431000	4218000		1945	0	0	229000	24000	60000		1945	4459000	4458000	3276000	4355000	4137000	3064000		4459000	4458000	3477000	4378000	4196000	3265000
1946	4459000	4458000	3609000	4431000	4239000	3719000		4459000	4459000	3846000	4456000	4301000	3956000		4459000	4457000	3372000	4406000	4177000	3482000		1946	4459000	4458000	3932000	4450000	4366000		1946	0	1000	237000	25000	62000		1946	4459000	4458000	3609000	4431000	4239000	3719000		4459000	4459000	3816000	4454000	4299000	3926000
1947	4459000	4456000	3398000	4421000	4184000	3486000		4459000	4457000	3615000	4444000	4242000	3703000		4459000	4455000	3181000	4398000	4126000	3269000		1947	4459000	4457000	3703000	4414000	4200000		1947	0	1000	217000	23000	58000		1947	4459000	4456000	3398000	4421000	4184000	3486000		4459000	4457000	3587000	4443000	4239000	3675000
1948	4459000	4458000	3504000	4428000	4212000	3695000		4459000	4458000	3718000	4452000	4271000	3909000		4459000	4458000	3290000	4404000	4153000	3481000		1948	4459000	4457000	3563000	4422000	4181000		1948	0	0	214000	24000	59000		1948	4459000	4458000	3504000	4428000	4212000	3695000		4459000	4458000	3693000	4450000	4268000	3884000
1949	4459000	4458000	3593000	4444000	4239000	3859000		4459000	4458000	3820000	4467000	4300000	4086000		4459000	4458000	3366000	4421000	4178000	3632000		1949	4459000	4458000	3859000	4429000	4220000		1949	0	0	227000	23000	61000		1949	4459000	4458000	3593000	4444000	4239000	3859000		4459000	4459000	3790000	4466000	4298000	4056000
1950	4459000	4458000	3479000	4439000	4209000	3421000		4459000	4459000	3705000	4462000	4270000	3647000		4459000	4457000	3253000	4416000	4148000	3195000		1950	4459000	4458000	4063000	4443000	4271000		1950	0	1000	226000	23000	61000		1950	4459000	4458000	3479000	4439000	4209000	3421000		4459000	4458000	3677000	4462000	4268000	3619000
1951	4459000	4458000	3382000	4419000	4180000	3372000		4459000	4458000	3595000	4441000	4235000	3585000		4459000	4458000	3169000	4397000	4125000	3159000		1951	4459000	4458000	3558000	4373000	4227000		1951	0	0	213000	22000	55000		1951	4459000	4458000	3382000	4419000	4180000	3372000		4459000	4458000	3568000	4440000	4233000	3558000
1952	4459000	4458000	3057000	4379000	4088000	3404000		4459000	4459000	3264000	4401000	4141000	3611000		4459000	4457000	2850000	4357000	4035000	3197000		1952	4459000	4458000	3193000	4480000	4338000		1952	0	1000	207000	22000	53000		1952	4459000	4458000	3057000	4379000	4088000	3404000		4459000	4458000	3238000	4401000	4140000	3585000
1953	4459000	4458000	3375000	4440000	4183000	3350000		4459000	4458000	3585000	4463000	4238000	3560000		4459000	4458000	3165000	4417000	4128000	3140000		1953	4459000	4457000	3329000	4408000	4172000		1953	0	0	210000	23000	55000		1953	4459000	4458000	3065000	4420000	4101000	3196000		4459000	4458000	3249000	4442000	4154000	3380000
1954	4459000	4457000	3595000	4449000	4240000	3536000		4459000	4457000	3804000	4472000	4296000	3745000		4459000	4457000	3386000	4426000	4184000	3327000		1954	4459000	4457000	3529000	4419000	4199000		1954	0	0	209000	23000	56000		1954	4459000	4457000	3301000	4425000	4161000	3480000		4459000	4457000	3484000	4447000	4214000	3663000
1955	4459000	4457000	3527000	4473000	4229000	3524000		4459000	4457000	3734000	4495000	4284000	3731000		4459000	4457000	3320000	4451000	4174000	3317000		1955	4459000	4458000	3786000	4464000	4334000		1955	0	0	207000	22000	55000		1955	4459000	4457000	3227000	4436000	4145000	3462000		4459000	4458000	3411000	4457000	4197000	3646000
1956	4459000	4458000	3778000	4483000	4295000	3737000		4459000	4459000	3985000	4505000	4349000	3944000		4459000	4457000	3571000	4461000	4241000	3530000		1956	4459000	4458000	3747000	4437000	4257000		1956	0	1000	207000	22000	54000		1956	4459000	4458000	3495000	4441000	4213000	3788000		4459000	4459000	3679000	4462000	4265000	3972000
1957	4459000	4457000	3702000	4437000	4264000	3688000		4459000	4458000	3909000	4459000	4318000	3895000		4459000	4456000	3495000	4415000	4210000	3481000		1957	4459000	4457000	3728000	4483000	4305000		1957	0	1000	207000	22000	54000		1957	4459000	4457000	3414000	4419000	4187000	3712000		4459000	4458000	3595000	4441000	4240000	3893000
1958	4459000	4459000	3816000	4456000	4298000	3741000		4459000	4459000	4023000	4479000	4351000	3948000		4459000	4459000	3609000	4433000	4245000	3534000		1958	4459000	4459000	3864000	4490000	4409000		1958	0	0	207000	23000	53000		1958	4459000	4459000	3536000	4428000	4221000	3794000		4459000	4459000	3716000	4449000	4272000	3974000
1959	4459000	4458000	3398000	4384000	4175000	3381000		4459000	4458000	3605000	4407000	4229000	3588000		4459000	4458000	3191000	4361000	4121000	3174000		1959	4459000	4458000	3276000	4422000	4169000		1959	0	0	207000	23000	54000		1959	4459000	4458000	3089000	4393000	4100000	3244000		4459000	4458000	3269000	4414000	4151000	3424000
1960	4459000	4458000	3413000	4420000	4188000	3369000		4459000	4458000	3620000	4443000	4241000	3576000		4459000	4458000	3206000	4397000	4135000	3162000		1960	4459000	4458000	3752000	4437000	4304000		1960	0	0	207000	23000	53000		1960	4459000	4458000	3106000	4410000	4108000	3226000		4459000	4458000	3287000	4431000	4158000	3407000
1961	4459000	4458000	3466000	4468000	4213000	3447000		4459000	4458000	3673000	4490000	4268000	3654000		4459000	4458000	3259000	4446000	4158000	3240000		1961	4459000	4458000	3669000	4448000	4290000		1961	0	0	207000	22000	55000		1961	4459000	4458000	3162000	4434000	4128000	3345000		4459000	4458000	3344000	4455000	4181000	3527000
1962	4459000	4458000	3907000	4476000	4325000	3842000		4459000	4458000	4115000	4498000	4379000	4050000		4459000	4458000	3699000	4454000	4271000	3634000		1962	4459000	4458000	3703000	4451000	4180000		1962	0	0	208000	22000	54000		1962	4459000	4458000	3633000	4438000	4247000	3947000		4459000	4458000	3820000	4459000	4300000	4134000
1963	4459000	4459000	3899000	4464000	4320000	3919000		4459000	4459000	4106000	4487000	4374000	4126000		4459000	4459000	3692000	4441000	4266000	3712000		1963	4459000	4459000	3840000	4430000	4272000		1963	0	0	207000	23000	54000		1963	4459000	4458000	3625000	4432000	4244000	4065000		4459000	4458000	3807000	4453000	4299000	4247000
1964	4459000	4458000	3763000	4442000	4281000	3683000		4459000	4458000	3972000	4465000	4335000	3892000		4459000	4458000	3554000	4419000	4227000	3474000		1964	4459000	4459000	3708000	4460000	4385000		1964	0	0	209000	23000	54000		1964	4459000	4458000	3479000	4422000	4205000	3705000		4459000	4458000	3663000	4443000	4257000	3889000
1965	4459000	4458000	3520000	4365000	4201000	3606000		4459000	4459000	3727000	4388000	4254000	3813000		4459000	4457000	3313000	4342000	4148000	3399000		1965	4459000	4458000	3796000	4481000	4392000		1965	0	1000	207000	23000	53000		1965	4459000	4458000	3219000	4384000	4130000	3587000		4459000	4458000	3401000	4405000	4182000	3769000
1966	4459000	4459000	3793000	4500000	4303000	3938000		4459000	4460000	4000000	4523000	4357000	4145000		4459000	4458000	3586000	4477000	4249000	3731000		1966	4459000	4458000	3738000	4435000	4392000		1966	0	1000	207000	23000	54000		1966	4459000	4459000	3512000	4450000	4220000	4094000		4459000	4459000	3694000	4471000	4273000	4276000
1967	4459000	4458000	3747000	4416000	4270000	3780000		4459000	4459000	3954000	4438000	4323000	3987000		4459000	4457000	3540000	4394000	4217000	3573000		1967	4459000	4457000	3601000	4368000	4140000		1967	0	1000	207000	22000	53000		1967	4459000	4458000	3463000	4409000	4197000	3853000		4459000	4459000	3644000	4430000	4247000	4034000
1968	4458000	4458000	3284000	4409000	4152000	3344000		4458000	4458000	3493000	4432000	4206000	3553000		4458000	4458000	3075000	4386000	4098000	3135000		1968	4459000	4458000	3752000	4518000	4298000		1968	0	0	209000	23000	54000		1968	4459000	4458000	2968000	4405000	4073000	3188000		4459000	4458000	3155000	4426000	4126000	3375000
1969	4459000	4458000	3846000	4469000	4308000	3832000		4459000	4459000	4053000	4492000	4362000	4039000		4459000	4457000	3639000	4446000	4254000	3625000		1969	4459000	4458000	3431000	4444000	4350000		1969	0	1000	207000	23000	54000		1969	4459000	4458000	3568000	4435000	4230000	3932000		4459000	4459000	3749000	4456000	4283000	4113000
1970	4459000	4459000	3740000	4439000	4274000	3772000		4459000	4460000	3947000	4462000	4328000	3979000		4459000	4458000	3533000	4416000	4220000	3565000		1970	4459000	4458000	3616000	4439000	4279000		1970	0	1000	207000	23000	54000		1970	4459000	4459000	3455000	4420000	4198000	3840000		4459000	4460000	3635000	4441000	4250000	4020000
1971	4459000	4458000	3497000	4445000	4215000	3581000		4459000	4459000	3704000	4468000	4268000	3788000		4459000	4457000	3290000	4422000	4162000	3374000		1971	4459000	4458000	3198000	4408000	4251000		1971	0	1000	207000	23000	53000		1971	4459000	4458000	3195000	4423000	4134000	3549000		4459000	4459000	3380000	4445000	4186000	3734000
1972	4459000	4458000	3755000	4411000	4271000	3827000		4459000	4458000	3962000	4433000	4324000	4034000		4459000	4458000	3548000	4389000	4218000	3620000		1972	4459000	4458000	3801000	4465000	4321000		1972	0	0	207000	22000	53000		1972	4459000	4458000	3528000	4415000	4215000	3899000		4459000	4459000	3713000	4436000	4267000	4084000
1973	4459000	4458000	3398000	4442000	4189000	3436000		4459000	4458000	3605000	4465000	4242000	3643000		4459000	4458000	3191000	4419000	4136000	3229000		1973	4459000	4458000	3533000	4446000	4272000		1973	0	0	207000	23000	53000		1973	4459000	4458000	3260000	4427000	4151000	3337000		4459000	4458000	3440000	4448000	4203000	3517000
1974	4459000	4458000	3614000	4417000	4237000	3661000		4459000	4458000	3824000	4439000	4291000	3871000		4459000	4458000	3404000	4395000	4183000	3451000		1974	4459000	4458000	3378000	4491000	4366000		1974	0	0	210000	22000	54000		1974	4459000	4458000	3422000	4418000	4189000	3660000		4459000	4459000	3604000	4439000	4241000	3842000
1975	4459000	4457000	3517000	4459000	4223000	3693000		4459000	4457000	3724000	4481000	4277000	3900000		4459000	4457000	3310000	4437000	4169000	3486000		1975	4459000	4458000	3548000	4413000	4192000		1975	0	0	207000	22000	54000		1975	4459000	4457000	3349000	4434000	4175000	3706000		4459000	4458000	3537000	4455000	4229000	3894000
1976	4459000	4458000	3528000	4477000	4231000	3594000		4459000	4458000	3735000	4500000	4284000	3801000		4459000	4458000	3321000	4454000	4178000	3387000		1976	4459000	4458000	3626000	4490000	4363000		1976	0	0	207000	23000	53000		1976	4459000	4458000	3357000	4441000	4179000	3564000		4459000	4459000	3542000	4462000	4231000	3749000
1977	4459000	4458000	3658000	4488000	4266000	3432000		4459000	4459000	3865000	4510000	4320000	3639000		4459000	4457000	3451000	4466000	4212000	3225000		1977	4459000	4457000	3640000	4466000	4331000		1977	0	1000	207000	22000	54000		1977	4459000	4458000	3455000	4445000	4204000	3331000		4459000	4459000	3640000	4466000	4257000	3516000
1978	4459000	4458000	3798000	4490000	4301000	3629000		4459000	4459000	4005000	4513000	4354000	3836000		4459000	4457000	3591000	4467000	4248000	3422000		1978	4459000	4458000	3742000	4415000	4251000		1978	0	1000	207000	23000	53000		1978	4459000	4458000	3560000	4446000	4231000	3614000		4459000	4459000	3741000	4467000	4282000	3795000
1979	4459000	4457000	3801000	4435000	4309000	3801000	Satellite era	4459000	4458000	4010000	4458000	4363000	4010000		4459000	4456000	3592000	4412000	4255000	3592000		1979	4459000	4458000	3825000	4462000	4377000	Satellite era	1979	0	1000	209000	23000	54000		1979	4459000	4457000	3712000	4433000	4298000	3712000	Satellite era	4459000	4458000	3894000	4454000	4350000	3894000
1980	4459000	4457000	3737000	4435000	4291000	3737000		4459000	4458000	3949000	4458000	4346000	3949000		4459000	4456000	3525000	4412000	4236000	3525000		1980	4459000	4458000	3349000	4452000	4271000		1980	0	1000	212000	23000	55000		1980	4459000	4457000	3660000	4433000	4281000	3660000		4459000	4458000	3847000	4455000	4334000	3847000
1981	4459000	4457000	3663000	4434000	4269000	3663000		4459000	4457000	3874000	4457000	4324000	3874000		4459000	4457000	3452000	4411000	4214000	3452000		1981	4459000	4457000	3640000	4408000	4125000		1981	0	0	211000	23000	55000		1981	4459000	4457000	3602000	4431000	4260000	3602000		4459000	4457000	3787000	4453000	4313000	3787000
1982	4459000	4457000	3749000	4435000	4294000	3749000		4459000	4457000	3961000	4458000	4349000	3961000		4459000	4457000	3537000	4412000	4239000	3537000		1982	4459000	4458000	3563000	4469000	4287000		1982	0	0	212000	23000	55000		1982	4459000	4457000	3670000	4433000	4284000	3670000		4459000	4457000	3856000	4454000	4336000	3856000
1983	4459000	4457000	3761000	4435000	4298000	3761000		4459000	4458000	3971000	4458000	4351000	3971000		4459000	4456000	3551000	4412000	4245000	3551000		1983	4459000	4458000	3252000	4396000	4166000		1983	0	1000	210000	23000	53000		1983	4459000	4457000	3680000	4433000	4287000	3680000		4459000	4458000	3872000	4454000	4340000	3872000
1984	4459000	4457000	3671000	4435000	4272000	3671000		4459000	4457000	3882000	4458000	4326000	3882000		4459000	4457000	3460000	4412000	4218000	3460000		1984	4459000	4458000	3509000	4435000	4252000		1984	0	0	211000	23000	54000		1984	4459000	4457000	3608000	4433000	4263000	3608000		4459000	4457000	3795000	4454000	4316000	3795000
1985	4459000	4457000	3611000	4434000	4254000	3611000		4459000	4458000	3818000	4457000	4307000	3818000		4459000	4456000	3404000	4411000	4201000	3404000		1985	4459000	4458000	3684000	4393000	4262000		1985	0	1000	207000	23000	53000		1985	4459000	4457000	3560000	4432000	4247000	3560000		4459000	4458000	3744000	4453000	4299000	3744000
1986	4459000	4457000	3677000	4435000	4273000	3677000		4459000	4457000	3888000	4458000	4326000	3888000		4459000	4457000	3466000	4412000	4220000	3466000		1986	4459000	4458000	3830000	4404000	4208000		1986	0	0	211000	23000	53000		1986	4459000	4457000	3613000	4433000	4265000	3613000		4459000	4457000	3798000	4455000	4318000	3798000
1987	4459000	4457000	3508000	4395000	4208000	3508000		4459000	4457000	3715000	4418000	4262000	3715000		4459000	4457000	3301000	4372000	4154000	3301000		1987	4459000	4459000	3723000	4491000	4400000		1987	0	0	207000	23000	54000		1987	4459000	4457000	3478000	4396000	4205000	3478000		4459000	4457000	3662000	4417000	4256000	3662000
1988	4459000	4457000	3611000	4435000	4254000	3611000		4459000	4457000	3818000	4457000	4308000	3818000		4459000	4457000	3404000	4413000	4200000	3404000		1988	4459000	4458000	3431000	4403000	4186000		1988	0	0	207000	22000	54000		1988	4459000	4457000	3560000	4433000	4247000	3560000		4459000	4457000	3744000	4454000	4301000	3744000
1989	4459000	4457000	3471000	4414000	4205000	3471000		4459000	4457000	3678000	4437000	4259000	3678000		4459000	4457000	3264000	4391000	4151000	3264000		1989	4459000	4458000	3718000	4436000	4194000		1989	0	0	207000	23000	54000		1989	4459000	4457000	3449000	4413000	4202000	3449000		4459000	4457000	3633000	4434000	4255000	3633000
1990	4459000	4456000	3049000	4435000	4090000	3049000		4459000	4457000	3332000	4469000	4172000	3332000		4459000	4455000	2766000	4401000	4008000	2766000		1990	4459000	4456000	3621000	4435000	4181000		1990	0	1000	283000	34000	82000		1990	4459000	4456000	3112000	4433000	4097000	3112000		4459000	4457000	3376000	4465000	4178000	3376000
1991	4459000	4457000	3341000	4435000	4176000	3341000		4459000	4457000	3618000	4463000	4265000	3618000		4459000	4457000	3064000	4407000	4087000	3064000		1991	4459000	4457000	2746000	4403000	4154000		1991	0	0	277000	28000	89000		1991	4459000	4457000	3345000	4432000	4175000	3345000		4459000	4457000	3593000	4458000	4264000	3593000
1992	4459000	4457000	3483000	4435000	4217000	3483000		4459000	4457000	3815000	4463000	4374000	3815000		4459000	4457000	3151000	4407000	4060000	3151000		1992	4459000	4458000	4029000	4477000	4322000		1992	0	0	332000	28000	157000		1992	4459000	4457000	3458000	4433000	4213000	3458000		4459000	4457000	3749000	4459000	4345000	3749000
1993	4459000	4457000	3259000	4435000	4152000	3259000		4459000	4457000	3611000	4465000	4264000	3611000		4459000	4457000	2907000	4405000	4040000	2907000		1993	4459000	4458000	3669000	4454000	4154000		1993	0	0	352000	30000	112000		1993	4459000	4457000	3279000	4433000	4154000	3279000		4459000	4457000	3596000	4461000	4266000	3596000
1994	4459000	4457000	3670000	4435000	4271000	3670000		4459000	4457000	3950000	4469000	4403000	3950000		4459000	4457000	3390000	4401000	4139000	3390000		1994	4459000	4458000	3480000	4444000	4304000		1994	0	0	280000	34000	132000		1994	4459000	4457000	3607000	4433000	4263000	3607000		4459000	4458000	3858000	4465000	4393000	3858000
1995	4459000	4451000	3108000	4431000	4096000	3108000		4459000	4452000	3383000	4464000	4190000	3383000		4459000	4450000	2833000	4398000	4002000	2833000		1995	4459000	4457000	3047000	4366000	4065000		1995	0	1000	275000	33000	94000		1995	4459000	4451000	3159000	4429000	4103000	3159000		4459000	4452000	3407000	4459000	4195000	3407000
1996	4459000	4457000	3733000	4420000	4283000	3733000		4459000	4457000	3996000	4451000	4392000	3996000		4459000	4457000	3470000	4389000	4174000	3470000		1996	4459000	4458000	3908000	4398000	4123000		1996	0	0	263000	31000	109000		1996	4459000	4457000	3657000	4419000	4274000	3657000		4459000	4457000	3892000	4448000	4384000	3892000
1997	4459000	4457000	3317000	4435000	4169000	3317000		4459000	4458000	3591000	4471000	4269000	3591000		4459000	4456000	3043000	4399000	4069000	3043000		1997	4459000	4456000	3086000	4446000	4135000		1997	0	1000	274000	36000	100000		1997	4459000	4457000	3326000	4433000	4169000	3326000		4459000	4458000	3579000	4466000	4268000	3579000
1998	4459000	4457000	3687000	4435000	4276000	3687000		4459000	4458000	4062000	4467000	4389000	4062000		4459000	4456000	3312000	4403000	4163000	3312000		1998	4459000	4458000	3567000	4477000	4365000		1998	0	1000	375000	32000	113000		1998	4459000	4457000	3621000	4433000	4267000	3621000		4459000	4458000	3958000	4463000	4375000	3958000
1999	4459000	4457000	3653000	4435000	4266000	3653000		4459000	4457000	3940000	4467000	4371000	3940000		4459000	4457000	3366000	4403000	4161000	3366000		1999	4459000	4458000	3485000	4413000	4180000		1999	0	0	287000	32000	105000		1999	4459000	4457000	3593000	4432000	4258000	3593000		4459000	4457000	3851000	4461000	4357000	3851000
2000	4459000	4457000	3341000	4428000	4173000	3341000		4459000	4457000	3621000	4464000	4274000	3621000		4459000	4457000	3061000	4392000	4072000	3061000		2000	4459000	4457000	3431000	4474000	4219000		2000	0	0	280000	36000	101000		2000	4459000	4457000	3344000	4426000	4173000	3344000		4459000	4458000	3597000	4459000	4269000	3597000
2001	4459000	4457000	3531000	4411000	4221000	3531000		4459000	4458000	3826000	4443000	4330000	3826000		4459000	4456000	3236000	4379000	4112000	3236000		2001	4459000	4457000	3222000	4382000	4144000		2001	0	1000	295000	32000	109000		2001	4459000	4457000	3496000	4411000	4217000	3496000		4459000	4458000	3783000	4440000	4322000	3783000
2002	4459000	4457000	3344000	4435000	4177000	3344000		4459000	4458000	3632000	4470000	4277000	3632000		4459000	4456000	3056000	4400000	4077000	3056000		2002	4459000	4457000	3349000	4434000	4203000		2002	0	1000	288000	35000	100000		2002	4459000	4457000	3347000	4432000	4176000	3347000		4459000	4457000	3614000	4465000	4271000	3614000
2003	4459000	4457000	3341000	4429000	4173000	3341000		4459000	4458000	3626000	4462000	4273000	3626000		4459000	4456000	3056000	4396000	4073000	3056000		2003	4459000	4457000	2853000	4401000	4141000		2003	0	1000	285000	33000	100000		2003	4459000	4457000	3345000	4427000	4173000	3345000		4459000	4457000	3599000	4457000	4266000	3599000
2004	4459000	4457000	3513000	4434000	4225000	3513000		4459000	4457000	3775000	4460000	4301000	3775000		4459000	4457000	3251000	4408000	4149000	3251000		2004	4459000	4458000	3417000	4428000	4218000		2004	0	0	262000	26000	76000		2004	4459000	4457000	3482000	4431000	4221000	3482000		4459000	4457000	3719000	4456000	4297000	3719000
2005	4459000	4457000	3005000	4386000	4058000	3005000		4459000	4457000	3238000	4413000	4127000	3238000		4459000	4457000	2772000	4359000	3989000	2772000		2005	4459000	4457000	2936000	4377000	4068000		2005	0	0	233000	27000	69000		2005	4459000	4457000	3077000	4387000	4068000	3077000		4459000	4457000	3289000	4412000	4133000	3289000
2006	4459000	4457000	3144000	4434000	4118000	3144000		4459000	4457000	3377000	4466000	4202000	3377000		4459000	4457000	2911000	4402000	4034000	2911000		2006	4459000	4458000	3062000	4401000	4184000		2006	0	0	233000	32000	84000		2006	4459000	4457000	3188000	4431000	4122000	3188000		4459000	4458000	3393000	4461000	4201000	3393000
2007	4459000	4457000	2708000	4320000	3944000	2708000		4459000	4458000	2954000	4352000	4024000	2954000		4459000	4456000	2462000	4288000	3864000	2462000		2007	4459000	4456000	2892000	4350000	3971000		2007	0	1000	246000	32000	80000		2007	4459000	4457000	2840000	4326000	3964000	2840000		4459000	4458000	3058000	4355000	4039000	3058000
2008	4459000	4457000	3357000	4377000	4156000	3357000		4459000	4458000	3594000	4403000	4238000	3594000		4459000	4456000	3120000	4351000	4074000	3120000		2008	4459000	4457000	3198000	4376000	4053000		2008	0	1000	237000	26000	82000		2008	4459000	4457000	3358000	4379000	4157000	3358000		4459000	4458000	3567000	4402000	4236000	3567000
2009	4459000	4457000	3008000	4430000	4077000	3008000		4459000	4457000	3243000	4455000	4139000	3243000		4459000	4457000	2773000	4405000	4015000	2773000		2009	4459000	4457000	3193000	4413000	4177000		2009	0	0	235000	25000	62000		2009	4459000	4457000	3079000	4428000	4085000	3079000		4459000	4457000	3292000	4451000	4148000	3292000
2010	4459000	4457000	3032000	4418000	4079000	3032000		4459000	4457000	3267000	4444000	4140000	3267000		4459000	4457000	2797000	4392000	4018000	2797000		2010	4459000	4457000	2984000	4382000	4118000		2010	0	0	235000	26000	61000		2010	4459000	4457000	3098000	4417000	4087000	3098000		4459000	4457000	3314000	4440000	4148000	3314000
2011	4459000	4457000	2788000	4318000	3967000	2788000		4459000	4458000	3023000	4343000	4027000	3023000		4459000	4456000	2553000	4293000	3907000	2553000		2011	4459000	4456000	3101000	4386000	4007000		2011	0	1000	235000	25000	60000		2011	4459000	4457000	2904000	4325000	3984000	2904000		4459000	4458000	3118000	4349000	4044000	3118000
2012	4459000	4457000	2806000	4274000	3949000	2806000		4459000	4458000	3058000	4303000	4028000	3058000		4459000	4456000	2554000	4245000	3870000	2554000		2012	4459000	4456000	3169000	4382000	4073000		2012	0	1000	252000	29000	79000		2012	4459000	4457000	2918000	4284000	3968000	2918000		4459000	4458000	3145000	4311000	4045000	3145000
2013	4459000	4457000	3073000	4405000	4085000	3073000		4459000	4457000	3377000	4433000	4169000	3377000		4459000	4457000	2769000	4377000	4001000	2769000		2013	4459000	4456000	3261000	4354000	4064000		2013	0	0	304000	28000	84000		2013	4459000	4457000	3131000	4405000	4092000	3131000		4459000	4457000	3403000	4431000	4175000	3403000
2014	4459000	4457000	2990000	4432000	4073000	2990000		4459000	4458000	3252000	4461000	4148000	3252000		4459000	4456000	2728000	4403000	3998000	2728000		2014	4459000	4456000	2955000	4374000	4009000		2014	0	1000	262000	29000	75000		2014	4459000	4457000	3065000	4430000	4081000	3065000		4459000	4458000	3295000	4457000	4151000	3295000
2015	4459000	4457000	2748000	4371000	3977000	2748000		4459000	4458000	2999000	4400000	4051000	2999000		4459000	4456000	2497000	4342000	3903000	2497000		2015	4459000	4456000	3086000	4378000	4005000		2015	0	1000	251000	29000	74000		2015	4459000	4457000	2871000	4373000	3993000	2871000		4459000	4458000	3101000	4400000	4069000	3101000

## Sheet: 05 Satellite - original
North American, sea ice extents								Nordic, sea ice extents								Siberian, sea ice extents								Not Arctic, sea ice extents							Total Arctic							Total (inc non-Arctic), sea ice extents
Year	Winter	Spring	Summer	Autumn	Annual			Year	Winter	Spring	Summer	Autumn	Annual			Year	Winter	Spring	Summer	Autumn	Annual			Year	Winter	Spring	Summer	Autumn	Annual		Year	Winter	Spring	Summer	Autumn	Annual		Year	Winter	Spring	Summer	Autumn	Annual
1978				5548409				1978				2593190				1978				4459720				1978				861104	623310		1978				12601000			1978				12238000
1979	5678457	5621221	3732871	5480008	5128139			1979	3225552	2904473	1441037	2000258	2392830			1979	4459720	4459720	4054995	4459720	4358539			1979	3258652	1828366	175006	717071	1283111		1979	13364000	12985000	9229000	11940000	11880000		1979	16346000	14144000	8676000	11397000	12641000
1980	5685570	5670873	3785741	5454684	5149217			1980	2798354	2577619	1484834	2436236	2324261			1980	4459720	4459720	3953413	4459720	4333143			1980	3157390	2171137	184343	573478	1295963		1980	12944000	12708000	9224000	12351000	11807000		1980	15889000	14025000	8835000	11669000	12605000
1981	5694741	5702079	3497214	5210340	5026094			1981	2890122	2922610	1591320	2335347	2434850			1981	4459720	4459720	3837797	4455960	4303299			1981	2904226	1415474	164979	587258	1111249		1981	13045000	13084000	8926000	12002000	11764000		1981	15653000	13954000	8625000	11409000	12410000
1982	5865888	5777751	3639060	5707365	5247516			1982	3096211	2776118	1726351	2151421	2437525			1982	4459720	4459720	3973213	4459720	4338093			1982	2924089	1950801	164190	777358	1215416		1982	13422000	13014000	9339000	12319000	12024000		1982	16060000	14226000	8875000	11963000	12781000
1983	5958821	5834823	4122576	5696914	5403284			1983	2569410	2429470	1311341	2188359	2124645			1983	4459720	4459720	3992180	4459720	4342835			1983	3084951	1702554	205515	481769	1226265		1983	12988000	12724000	9426000	12345000	11871000		1983	15871000	13806000	9019000	11629000	12581000
1984	5940743	5827521	3788135	5655561	5302990			1984	2387611	2342669	1152289	1748301	1907718			1984	4459720	4459720	3849681	4459720	4307210			1984	2931816	1844074	164792	627205	1196396		1984	12788000	12630000	8790000	11864000	11518000		1984	15386000	13775000	8394000	11161000	12179000
1985	5761355	5705757	3623090	5310552	5100189			1985	2572733	2683985	1173441	2063667	2123457			1985	4459720	4459720	3755626	4457132	4283050			1985	3253542	1973031	164898	423478	1288687		1985	12794000	12849000	8552000	11831000	11507000		1985	15754000	14064000	8210000	11214000	12311000
1986	5661845	5653480	3797733	5620428	5183372			1986	2873587	2763683	1395820	2032453	2266386			1986	4459720	4459720	3859685	4459720	4309711			1986	3164181	1503676	181570	516041	1184793		1986	12995000	12877000	9053000	12113000	11760000		1986	15897000	13691000	8743000	11753000	12521000
1987	5776088	5750038	3320117	4568288	4853633			1987	2882162	2750249	1452101	1999819	2271083			1987	4459720	4459720	3593414	4368758	4220403			1987	3020916	1649220	170954	212286	1172098		1987	13118000	12960000	8366000	10937000	11345000		1987	15907000	13988000	8647000	11185000	12432000
1988	5728801	5673149	3542288	5429450	5093422			1988	2869919	2765226	1514136	2536325	2421402			1988	4459720	4459720	3755465	4459720	4283656			1988	3045369	1558782	121779	688979	1156665		1988	13058000	12898000	8812000	12425000	11798000		1988	15786000	13721000	8492000	11736000	12434000
1989	5795354	5710304	3668603	5514741	5172251			1989	2909629	2385268	1611960	2231069	2284482			1989	4459720	4459720	3535711	4411245	4216599			1989	2658921	998276	125304	574403	1006568		1989	13165000	12555000	8816000	12157000	11673000		1989	15585000	13342000	8456000	11574000	12239000
1990	5843783	5793995	3565822	5585958	5197390			1990	2620345	2373238	1336563	2002646	2083198			1990	4459720	4451511	2871093	4459720	4060511			1990	3024017	1325474	123747	520586	1141213		1990	12924000	12619000	7773000	12048000	11341000		1990	15657000	13291000	7564000	11394000	11977000
1991	5842643	5746704	3646459	5534628	5192609			1991	2470719	2401860	1243353	2020806	2034185			1991	4459720	4459720	3330807	4458468	4177179			1991	2709376	1628254	155449	457825	1104060		1991	12773000	12608000	8221000	12014000	11404000		1991	15257000	13651000	7901000	11213000	12006000
1992	5812856	5730684	4179371	5592373	5328821			1992	2494119	2275153	1503050	2005554	2069469			1992	4459720	4459720	3553629	4459720	4233197			1992	2828197	1522200	125680	849748	1152520		1992	12767000	12466000	9236000	12058000	11632000		1992	15375000	13451000	8698000	11712000	12309000
1993	5958311	5830781	3426579	5621921	5209398			1993	2465650	2424959	1591274	2027451	2127334			1993	4459720	4459720	3201619	4459720	4145195			1993	2991073	1703932	121817	690080	1209506		1993	12884000	12715000	8219000	12109000	11482000		1993	15726000	13662000	7818000	11548000	12189000
1994	5811045	5675577	3567298	5378988	5108227			1994	2514843	2438149	1312314	2101394	2091675			1994	4459720	4459720	3848728	4459720	4306972			1994	3028865	1752553	134751	800410	1254100		1994	12786000	12573000	8728000	11940000	11507000		1994	15598000	13713000	8364000	11506000	12295000
1995	5769246	5674253	3422820	5430141	5074115			1995	2364523	2103594	1344869	2160677	1993416			1995	4459720	4403776	2963514	4449677	4069172			1995	2805495	1579377	118376	364971	1094285		1995	12593000	12182000	7731000	12040000	11137000		1995	15217000	13179000	7356000	11025000	11694000
1996	5716123	5637589	3786468	5264519	5101175			1996	2623153	2524716	1269752	2045787	2115852			1996	4459720	4459720	3946865	4425753	4323015			1996	2550416	1072985	136176	468630	926976		1996	12799000	12622000	9003000	11736000	11540000		1996	15065000	13260000	8835000	11118000	12070000
1997	5744193	5664847	3298585	5316173	5005950			1997	2937529	2708200	1469974	2192264	2326992			1997	4459720	4459720	3293260	4459720	4168105			1997	2619662	1005079	30234	416221	903779		1997	13141000	12833000	8062000	11968000	11501000		1997	15394000	13285000	7788000	10974000	11860000
1998	5713992	5646420	2926391	4651308	4734528			1998	2968186	2770054	1508930	2119987	2341789			1998	4459720	4459720	3874988	4459720	4313537			1998	2761955	1391125	25198	652665	1018690		1998	13142000	12876000	8310000	11231000	11390000		1998	15557000	13532000	7805000	10926000	11955000
1999	5728743	5657144	3512831	4973496	4968054			1999	2522394	2545233	1294039	1830594	2048065			1999	4459720	4459720	3821372	4459073	4299971			1999	2709280	1852011	99090	658335	1124685		1999	12711000	12662000	8628000	11263000	11316000		1999	15246000	13746000	7726000	11002000	11930000
2000	5745307	5650442	3604173	5274022	5068486			2000	2318292	2252447	1313545	1751548	1908958			2000	4459720	4459720	3330010	4444447	4173474			2000	2828883	1424098	46346	467181	1010311		2000	12523000	12363000	8248000	11470000	11151000		2000	15010000	13195000	7705000	10773000	11671000
2001	5723522	5652939	3444591	5019760	4960203			2001	2586914	2523677	1109113	1858330	2019509			2001	4459720	4459720	3630216	4405867	4238881			2001	2803948	1682106	130072	610039	1139187		2001	12770000	12636000	8184000	11284000	11219000		2001	15251000	13525000	7853000	10859000	11872000
2002	5712897	5660701	3495878	5194194	5015918			2002	2547317	2352571	1059735	1913250	1968218			2002	4459720	4459720	3334966	4459109	4178379			2002	2777113	1231609	112555	348440	1033612		2002	12720000	12473000	7891000	11567000	11163000		2002	15211000	13143000	7326000	10880000	11640000
2003	5673861	5637939	3249536	4919124	4870115			2003	2565945	2461696	1325715	2007546	2090226			2003	4459720	4459720	3330453	4445935	4173957			2003	2921386	1302638	119937	456296	1038722		2003	12700000	12559000	7906000	11373000	11135000		2003	15303000	13226000	7484000	10659000	11668000
2004	5644369	5603783	3538772	5395054	5045495			2004	2581917	2233846	1046727	1782079	1911142			2004	4459720	4459720	3601258	4455881	4244145			2004	2249407	991564	53112	370591	815179		2004	12686000	12297000	8187000	11633000	11201000		2004	14706000	12761000	7429000	10622000	11380000
2005	5659593	5569933	3261378	5075984	4891722			2005	2306813	2317376	1181476	1784328	1897498			2005	4459720	4459720	2802673	4348671	4017696			2005	2277562	1268025	129722	605077	916166		2005	12426000	12347000	7246000	11209000	10807000		2005	14418000	12887000	6962000	10528000	11199000
2006	5647108	5577905	3240703	4979395	4861278			2006	2210946	1902397	1119142	1650426	1720728			2006	4459073	4457132	3021027	4456484	4098429			2006	2158723	1381271	126814	383430	897662		2006	12317000	11937000	7381000	11086000	10680000		2006	14274000	12639000	7051000	10208000	11043000
2007	5649072	5637966	3009506	5382406	4919738			2007	2162948	1992477	1238876	1654456	1762189			2007	4459720	4457132	2334183	4198888	3862481			2007	2370588	1280686	124179	296601	930160		2007	12272000	12088000	6583000	11236000	10545000		2007	14452000	12823000	5943000	9768000	10747000
2008	5855779	5685584	2770672	5416442	4932119			2008	2126266	2117633	1216038	1759885	1804956			2008	4456484	4459720	3356617	4329013	4150459			2008	2767987	1502156	105927	485744	1052026		2008	12439000	12263000	7343000	11505000	10888000		2008	14911000	13057000	6581000	10590000	11285000
2009	5750011	5690059	3195340	5124479	4939972			2009	2285988	2263422	1221017	1619759	1847547			2009	4459073	4459720	2806393	4447419	4043151			2009	2596475	1589184	107397	559932	1054055		2009	12495000	12413000	7223000	11192000	10831000		2009	14889000	13221000	6803000	10144000	11264000
2010	5629979	5592921	2972750	4571759	4691852			2010	2375084	2301204	1132870	1864122	1918320			2010	4459720	4457132	2844785	4420315	4045488			2010	2471770	1632317	103172	335276	988455		2010	12465000	12351000	6950000	10856000	10656000		2010	14655000	12936000	6425000	9948000	10991000
2011	5614833	5670536	2848839	5121718	4813982			2011	2342111	2137083	1234773	1611941	1831477			2011	4459720	4457779	2460433	4195171	3893276			2011	2175653	1301493	97975	592165	886834		2011	12417000	12265000	6544000	10929000	10539000		2011	14347000	12714000	5996000	9900000	10739000
2012	5813899	5687306	2754687	5118267	4843540			2012	1968634	2017518	1088948	1523379	1649620			2012	4439629	4453912	2488582	4093887	3869003			2012	2821181	1807415	115827	556786	1126383		2012	12222000	12159000	6332000	10736000	10362000		2012	14665000	12974000	5424000	9789000	10713000
2013	5686868	5629377	3187146	5387367	4972690			2013	2221050	2197268	906997	1674316	1749908			2013	4457132	4457779	2908916	4391035	4053716			2013	2557311	1451817	113624	309329	1009811		2013	12365000	12284000	7003000	11453000	10776000		2013	14698000	13095000	6623000	10341000	11189000
2014	5755396	5736517	3105730	5311649	4977323			2014	2060035	2085092	1243695	1832457	1805320			2014	4457132	4459720	2778092	4452774	4036930			2014	2594159	1186719	110293	341277	972410		2014	12273000	12281000	7128000	11597000	10820000		2014	14600000	12872000	6580000	10390000	11111000
2015	5755896	5740682	3257257	5244008	4999461			2015	2229355	1897833	1155174	1422489	1676213			2015	4459105	4455869	2397097	4313851	3906481			2015	2152939	1291870	188978	458961	903183		2015	12444000	12094000	6810000	10980000	10582000		2015	14353000	12660000	6372000	10136000	10880000
	Satellite era (1979-2015)				Satellite era (1979-2015)				Satellite era (1979-2015)				Satellite era (1979-2015)				Satellite era (1979-2015)				Satellite era (1979-2015)
	Winter American				Winter American				Winter Nordic				Winter Nordic				Winter Siberian				Winter Siberian
	Unadjusted	Unadjusted			MW09-adjusted	MW09-adjusted			Unadjusted	Unadjusted			MW09-adjusted	MW09-adjusted			Unadjusted	Unadjusted			MW09-adjusted	MW09-adjusted
slope	-28410.7	5.78831e+06	intercept	slope	-26925.5	5.77851e+06		slope	-181546	2.70165e+06	intercept	slope	-184044	2.69896e+06		slope	-118.888	4.45901e+06	intercept	slope	-10.9866	4.45891e+06
+/-	7562.83	15954.3	+/-	+/-	8041.8	15284.3		+/-	31482.9	45764.9	+/-	+/-	32251.6	45802.4		+/-	401.626	679.082	+/-	+/-	393.252	642.086
r2	0.287346	76642.6	s(y)	r2	0.242594	79012.4		r2	0.487198	219296	s(y)	r2	0.481973	220411		r2	0.00249734	3392.12	s(y)	r2	2.23001e-05	3396.32
F	14.1122	35	degrees of freedom	F	11.2104	35		F	33.2524	35	degrees of freedom	F	32.564	35		F	0.0876258	35	degrees of freedom	F	0.000780523	35
regression ss	8.28962e+10	2.05593e+11	residual ss	regression ss	6.99859e+10	2.18503e+11		regression ss	1.59914e+12	1.68318e+12	residual ss	regression ss	1.58199e+12	1.70033e+12		regression ss	1.00826e+06	4.02726e+08	residual ss	regression ss	9003.33	4.03725e+08
p	0.000627294			p	0.00195612			p	1.5684e-06			p	1.88197e-06			p	0.768967			p	0.97787
	Spring American				Spring American				Spring Nordic				Spring Nordic				Spring Siberian				Spring Siberian
	Unadjusted	Unadjusted			MW09-adjusted	MW09-adjusted			Unadjusted	Unadjusted			MW09-adjusted	MW09-adjusted			Unadjusted	Unadjusted			MW09-adjusted	MW09-adjusted
slope	-17120.2	5.70188e+06			-17825.1	5.70231e+06		slope	-302202	2.59061e+06		slope	-307706	2.58878e+06		slope	-551.023	4.45805e+06		slope	-681.757	4.45812e+06
+/-	9532.34	13633.4			10125.4	13907.2		+/-	39479.1	37347.8		+/-	41787.2	38335.2		+/-	1270.55	2125.69		+/-	1360.71	2094.03
r2	0.0843846	65201.3			0.081344	65309.5		r2	0.626049	171587		r2	0.607726	175741		r2	0.00534515	9349.54		r2	0.0071212	9341.19
F	3.22566	35			3.09914	35		F	58.5951	35		F	54.2234	35		F	0.188085	35		F	0.25103	35
regression ss	1.37129e+10	1.48792e+11			1.32188e+10	1.49286e+11		regression ss	1.72517e+12	1.03048e+12		regression ss	1.67468e+12	1.08097e+12		regression ss	1.64413e+07	3.05949e+09		regression ss	2.19043e+07	3.05403e+09
p	0.0811296				0.087071			p	5.57182e-09			p	1.30459e-08			p	0.667176			p	0.619488
	Summer American				Summer American				Summer Nordic				Summer Nordic				Summer Siberian				Summer Siberian
	Unadjusted	Unadjusted			MW09-adjusted	MW09-adjusted			Unadjusted	Unadjusted			MW09-adjusted	MW09-adjusted			Unadjusted	Unadjusted			MW09-adjusted	MW09-adjusted
slope	-408440	3.59469e+06			-454422	3.62883e+06		slope	-164424	1.40347e+06		slope	-162335	1.39587e+06		slope	-485732	3.61644e+06		slope	-435544	3.55667e+06
+/-	66049.4	47778.6			66877	47737.2		+/-	36663.2	32698.5		+/-	39094.9	33137		+/-	100090	84742.7		+/-	125419	93124.6
r2	0.522119	239062			0.56881	227084		r2	0.364937	148622		r2	0.330039	152651		r2	0.40223	402244		r2	0.256263	448675
F	38.24	35			46.1707	35		F	20.1126	35		F	17.2419	35		F	23.5509	35		F	12.0597	35
regression ss	2.18545e+12	2.00028e+12			2.38089e+12	1.80485e+12		regression ss	4.44256e+11	7.73095e+11		regression ss	4.01774e+11	8.15577e+11		regression ss	3.81054e+12	5.66301e+12		regression ss	2.42772e+12	7.04583e+12
p	4.42416e-07				7.03916e-08			p	7.52412e-05			p	0.000200475			p	2.49968e-05			p	0.00138996
	Autumn American				Autumn American				Autumn Nordic				Autumn Nordic				Autumn Siberian				Autumn Siberian
	Unadjusted	Unadjusted			MW09-adjusted	MW09-adjusted			Unadjusted	Unadjusted			MW09-adjusted	MW09-adjusted			Unadjusted	Unadjusted			MW09-adjusted	MW09-adjusted
slope	-129004	5.43974e+06			-131355	5.43756e+06		slope	-191292	2.11889e+06		slope	-195017	2.11501e+06		slope	-23191.4	4.44124e+06		slope	-22092.5	4.43723e+06
+/-	19818.4	40792.3			19704.2	39924		+/-	29263.1	38743		+/-	31226.7	39681.4		+/-	7975.56	15918.2		+/-	8352.73	15765
r2	0.547634	201434			0.559417	198794		r2	0.549736	170762		r2	0.527044	175012		r2	0.194575	78416.9		r2	0.166582	79767.9
F	42.3709	35			44.4402	35		F	42.7321	35		F	39.0027	35		F	8.45532	35		F	6.99576	35
regression ss	1.71923e+12	1.42015e+12			1.75623e+12	1.38316e+12		regression ss	1.24605e+12	1.02059e+12		regression ss	1.19462e+12	1.07202e+12		regression ss	5.19935e+10	2.15222e+11		regression ss	4.45134e+10	2.22702e+11
p	1.65731e-07				1.03419e-07			p	1.52494e-07			p	3.67496e-07			p	0.00628045			p	0.0121514
	Annual American				Annual American				Annual Nordic				Annual Nordic				Annual Siberian				Annual Siberian
	Unadjusted	Unadjusted			MW09-adjusted	MW09-adjusted			Unadjusted	Unadjusted			MW09-adjusted	MW09-adjusted			Unadjusted	Unadjusted			MW09-adjusted	MW09-adjusted
slope	-123305	5.15315e+06		slope	-128837	5.14755e+06		slope	-247041	2.23265e+06		slope	-256576	2.22778e+06		slope	-109756	4.27624e+06		slope	-111398	4.26337e+06
+/-	17803.1	24331.4		+/-	20399.9	25507.9		+/-	31348.6	32682		+/-	33619.9	33097.9		+/-	16980.7	22818.1		+/-	20460	24310.9
r2	0.578162	107575		r2	0.532625	113232		r2	0.639554	138722		r2	0.624635	141563		r2	0.54414	98580.5		r2	0.458576	107435
F	47.9702	35		F	39.8864	35		F	62.1019	35		F	58.2426	35		F	41.778	35		F	29.6444	35
regression ss	5.55127e+11	4.05032e+11		regression ss	5.11405e+11	4.48754e+11		regression ss	1.19507e+12	6.73528e+11		regression ss	1.16719e+12	7.01405e+11		regression ss	4.06003e+11	3.40134e+11		regression ss	3.42161e+11	4.03976e+11
p	4.76027e-08			p	2.97135e-07			p	2.89856e-09			p	5.9584e-09			p	1.90168e-07			p	4.16925e-06

## Sheet: 06 Satellite - rescaled
Non-rescaled								Rescaled (unadjusted T)								Rescaled (MW09-adjusted T)								Non-rescaled								Rescaled (unadjusted T)								Rescaled (MW09-adjusted T)								Non-rescaled
North American, sea ice extents								North American, sea ice extents								North American, sea ice extents								Nordic, sea ice extents								Nordic, sea ice extents								Nordic, sea ice extents								Siberian, sea ice extents
Year	Winter	Spring	Summer	Autumn	Annual			Year	Winter	Spring	Summer	Autumn	Annual			Year	Winter	Spring	Summer	Autumn	Annual			Year	Winter	Spring	Summer	Autumn	Annual			Year	Winter	Spring	Summer	Autumn	Annual			Year	Winter	Spring	Summer	Autumn	Annual			Year	Winter
1978				5548409				1978								1978								1978				2593190				1978								1978								1978
1979	5678457	5621221	3732871	5480008	5128139			1979	5714000	5668000	3648000	5431000	5107000			1979	5716000	5667000	3658000	5431000	5105000			1979	3225552	2904473	1441037	2000258	2392830			1979	3019000	2800000	1388000	1996000	2324000			1979	3016000	2794000	1383000	1985000	2320000			1979	4459720
1980	5685570	5670873	3785741	5454684	5149217			1980	5717000	5682000	3686000	5412000	5123000			1980	5720000	5681000	3697000	5413000	5120000			1980	2798354	2577619	1484834	2436236	2324261			1980	2720000	2542000	1415000	2343000	2270000			1980	2719000	2539000	1408000	2301000	2266000			1980	4459720
1981	5694741	5702079	3497214	5210340	5026094			1981	5722000	5691000	3478000	5231000	5030000			1981	5724000	5690000	3480000	5230000	5030000			1981	2890122	2922610	1591320	2335347	2434850			1981	2784000	2815000	1479000	2263000	2358000			1981	2783000	2808000	1469000	2228000	2353000			1981	4459720
1982	5865888	5777751	3639060	5707365	5247516			1982	5811000	5713000	3580000	5600000	5198000			1982	5808000	5712000	3587000	5601000	5192000			1982	3096211	2776118	1726351	2151421	2437525			1982	2928000	2699000	1561000	2116000	2360000			1982	2926000	2694000	1546000	2094000	2356000			1982	4459720
1983	5958821	5834823	4122576	5696914	5403284			1983	5860000	5729000	3929000	5592000	5317000			1983	5853000	5728000	3951000	5593000	5305000			1983	2569410	2429470	1311341	2188359	2124645			1983	2560000	2425000	1310000	2146000	2110000			1983	2560000	2424000	1309000	2121000	2109000			1983	4459720
1984	5940743	5827521	3788135	5655561	5302990			1984	5851000	5727000	3688000	5561000	5240000			1984	5844000	5726000	3699000	5562000	5232000			1984	2387611	2342669	1152289	1748301	1907718			1984	2433000	2356000	1214000	1795000	1937000			1984	2434000	2356000	1218000	1802000	1937000			1984	4459720
1985	5761355	5705757	3623090	5310552	5100189			1985	5757000	5692000	3568000	5305000	5086000			1985	5757000	5691000	3575000	5305000	5084000			1985	2572733	2683985	1173441	2063667	2123457			1985	2563000	2626000	1227000	2046000	2109000			1985	2562000	2622000	1230000	2031000	2108000			1985	4459720
1986	5661845	5653480	3797733	5620428	5183372			1986	5705000	5677000	3694000	5535000	5149000			1986	5708000	5676000	3706000	5536000	5145000			1986	2873587	2763683	1395820	2032453	2266386			1986	2773000	2689000	1361000	2021000	2223000			1986	2772000	2684000	1357000	2008000	2220000			1986	4459720
1987	5776088	5750038	3320117	4568288	4853633			1987	5765000	5705000	3350000	4754000	4899000			1987	5764000	5704000	3346000	4752000	4904000			1987	2882162	2750249	1452101	1999819	2271083			1987	2779000	2679000	1395000	1995000	2227000			1987	2778000	2674000	1389000	1984000	2224000			1987	4459720
1988	5728801	5673149	3542288	5429450	5093422			1988	5740000	5683000	3510000	5393000	5081000			1988	5741000	5682000	3514000	5394000	5079000			1988	2869919	2765226	1514136	2536325	2421402			1988	2770000	2690000	1433000	2423000	2347000			1988	2769000	2685000	1425000	2373000	2343000			1988	4459720
1989	5795354	5710304	3668603	5514741	5172251			1989	5775000	5694000	3601000	5457000	5141000			1989	5773000	5693000	3609000	5457000	5137000			1989	2909629	2385268	1611960	2231069	2284482			1989	2798000	2390000	1492000	2180000	2238000			1989	2797000	2389000	1481000	2152000	2235000			1989	4459720
1990	5843783	5793995	3565822	5585958	5197390			1990	5800000	5717000	3527000	5509000	5160000			1990	5797000	5716000	3532000	5510000	5155000			1990	2620345	2373238	1336563	2002646	2083198			1990	2596000	2380000	1325000	1998000	2077000			1990	2596000	2380000	1323000	1987000	2076000			1990	4459720
1991	5842643	5746704	3646459	5534628	5192609			1991	5799000	5704000	3585000	5471000	5156000			1991	5796000	5703000	3592000	5472000	5152000			1991	2470719	2401860	1243353	2020806	2034185			1991	2491000	2403000	1269000	2012000	2038000			1991	2492000	2402000	1270000	2000000	2037000			1991	4459720
1992	5812856	5730684	4179371	5592373	5328821			1992	5784000	5699000	3970000	5514000	5260000			1992	5782000	5698000	3994000	5515000	5251000			1992	2494119	2275153	1503050	2005554	2069469			1992	2508000	2303000	1426000	2000000	2066000			1992	2508000	2303000	1418000	1989000	2065000			1992	4459720
1993	5958311	5830781	3426579	5621921	5209398			1993	5860000	5728000	3427000	5536000	5169000			1993	5853000	5727000	3427000	5537000	5164000			1993	2465650	2424959	1591274	2027451	2127334			1993	2488000	2421000	1479000	2017000	2112000			1993	2488000	2420000	1469000	2005000	2111000			1993	4459720
1994	5811045	5675577	3567298	5378988	5108227			1994	5783000	5684000	3528000	5356000	5092000			1994	5781000	5683000	3533000	5356000	5090000			1994	2514843	2438149	1312314	2101394	2091675			1994	2522000	2432000	1311000	2076000	2084000			1994	2522000	2430000	1310000	2058000	2082000			1994	4459720
1995	5769246	5674253	3422820	5430141	5074115			1995	5761000	5683000	3424000	5394000	5066000			1995	5760000	5682000	3424000	5394000	5065000			1995	2364523	2103594	1344869	2160677	1993416			1995	2417000	2167000	1330000	2124000	2005000			1995	2418000	2170000	1328000	2101000	2005000			1995	4459720
1996	5716123	5637589	3786468	5264519	5101175			1996	5733000	5673000	3686000	5271000	5087000			1996	5734000	5672000	3698000	5271000	5085000			1996	2623153	2524716	1269752	2045787	2115852			1996	2598000	2500000	1285000	2032000	2103000			1996	2598000	2498000	1285000	2018000	2102000			1996	4459720
1997	5744193	5664847	3298585	5316173	5005950			1997	5748000	5681000	3334000	5309000	5014000			1997	5748000	5680000	3330000	5309000	5015000			1997	2937529	2708200	1469974	2192264	2326992			1997	2817000	2645000	1406000	2149000	2272000			1997	2816000	2641000	1400000	2124000	2268000			1997	4459720
1998	5713992	5646420	2926391	4651308	4734528			1998	5732000	5675000	3066000	4816000	4808000			1998	5733000	5674000	3050000	4813000	4817000			1998	2968186	2770054	1508930	2119987	2341789			1998	2839000	2694000	1429000	2091000	2284000			1998	2837000	2689000	1422000	2072000	2280000			1998	4459720
1999	5728743	5657144	3512831	4973496	4968054			1999	5740000	5679000	3489000	5055000	4986000			1999	5741000	5678000	3492000	5054000	4988000			1999	2522394	2545233	1294039	1830594	2048065			1999	2527000	2516000	1300000	1861000	2049000			1999	2527000	2514000	1299000	1862000	2048000			1999	4459720
2000	5745307	5650442	3604173	5274022	5068486			2000	5749000	5677000	3555000	5278000	5062000			2000	5749000	5676000	3561000	5278000	5061000			2000	2318292	2252447	1313545	1751548	1908958			2000	2385000	2285000	1312000	1798000	1938000			2000	2386000	2286000	1310000	1804000	1938000			2000	4459720
2001	5723522	5652939	3444591	5019760	4960203			2001	5737000	5677000	3440000	5089000	4980000			2001	5738000	5676000	3440000	5088000	4982000			2001	2586914	2523677	1109113	1858330	2019509			2001	2572000	2499000	1188000	1883000	2026000			2001	2572000	2497000	1194000	1882000	2026000			2001	4459720
2002	5712897	5660701	3495878	5194194	5015918			2002	5732000	5680000	3477000	5219000	5022000			2002	5733000	5679000	3479000	5218000	5023000			2002	2547317	2352571	1059735	1913250	1968218			2002	2545000	2364000	1158000	1926000	1985000			2002	2545000	2364000	1165000	1922000	1985000			2002	4459720
2003	5673861	5637939	3249536	4919124	4870115			2003	5711000	5673000	3299000	5014000	4911000			2003	5714000	5672000	3293000	5013000	4916000			2003	2565945	2461696	1325715	2007546	2090226			2003	2558000	2450000	1319000	2002000	2083000			2003	2558000	2449000	1317000	1990000	2081000			2003	4459720
2004	5644369	5603783	3538772	5395054	5045495			2004	5696000	5663000	3508000	5368000	5044000			2004	5699000	5662000	3511000	5368000	5044000			2004	2581917	2233846	1046727	1782079	1911142			2004	2569000	2270000	1151000	1822000	1940000			2004	2569000	2271000	1158000	1827000	1940000			2004	4459720
2005	5659593	5569933	3261378	5075984	4891722			2005	5704000	5654000	3308000	5131000	4927000			2005	5707000	5653000	3302000	5130000	4932000			2005	2306813	2317376	1181476	1784328	1897498			2005	2377000	2336000	1232000	1824000	1929000			2005	2378000	2336000	1235000	1828000	1929000			2005	4459720
2006	5647108	5577905	3240703	4979395	4861278			2006	5697000	5656000	3293000	5059000	4904000			2006	5701000	5655000	3287000	5058000	4910000			2006	2210946	1902397	1119142	1650426	1720728			2006	2310000	2008000	1194000	1717000	1788000			2006	2311000	2013000	1199000	1731000	1790000			2006	4459073
2007	5649072	5637966	3009506	5382406	4919738			2007	5698000	5673000	3126000	5358000	4949000			2007	5702000	5672000	3112000	5359000	4952000			2007	2162948	1992477	1238876	1654456	1762189			2007	2276000	2079000	1267000	1720000	1821000			2007	2278000	2083000	1268000	1734000	1822000			2007	4459720
2008	5855779	5685584	2770672	5416442	4932119			2008	5806000	5687000	2954000	5384000	4958000			2008	5803000	5686000	2932000	5384000	4961000			2008	2126266	2117633	1216038	1759885	1804956			2008	2251000	2178000	1253000	1804000	1855000			2008	2252000	2180000	1255000	1810000	1856000			2008	4456484
2009	5750011	5690059	3195340	5124479	4939972			2009	5751000	5688000	3260000	5167000	4964000			2009	5751000	5687000	3252000	5166000	4967000			2009	2285988	2263422	1221017	1619759	1847547			2009	2362000	2294000	1256000	1693000	1889000			2009	2363000	2294000	1258000	1709000	1890000			2009	4459073
2010	5629979	5592921	2972750	4571759	4691852			2010	5688000	5660000	3099000	4757000	4775000			2010	5692000	5659000	3085000	4754000	4786000			2010	2375084	2301204	1132870	1864122	1918320			2010	2424000	2324000	1203000	1887000	1945000			2010	2425000	2324000	1207000	1886000	1946000			2010	4459720
2011	5614833	5670536	2848839	5121718	4813982			2011	5680000	5682000	3010000	5165000	4868000			2011	5685000	5681000	2991000	5164000	4875000			2011	2342111	2137083	1234773	1611941	1831477			2011	2401000	2194000	1264000	1686000	1876000			2011	2402000	2196000	1265000	1703000	1877000			2011	4459720
2012	5813899	5687306	2754687	5118267	4843540			2012	5784000	5687000	2942000	5162000	4891000			2012	5782000	5686000	2920000	5162000	4897000			2012	1968634	2017518	1088948	1523379	1649620			2012	2140000	2099000	1176000	1616000	1731000			2012	2142000	2102000	1182000	1639000	1733000			2012	4439629
2013	5686868	5629377	3187146	5387367	4972690			2013	5718000	5671000	3254000	5362000	4989000			2013	5720000	5670000	3246000	5362000	4991000			2013	2221050	2197268	906997	1674316	1749908			2013	2317000	2241000	1066000	1736000	1811000			2013	2318000	2243000	1078000	1748000	1813000			2013	4457132
2014	5755396	5736517	3105730	5311649	4977323			2014	5754000	5701000	3195000	5306000	4993000			2014	5754000	5700000	3185000	5306000	4994000			2014	2060035	2085092	1243695	1832457	1805320			2014	2204000	2153000	1269000	1862000	1855000			2014	2206000	2155000	1270000	1863000	1856000			2014	4457132
2015	5755896	5740682	3257257	5244008	4999461			2015	5754000	5702000	3305000	5256000	5009000			2015	5754000	5701000	3299000	5255000	5011000			2015	2229355	1897833	1155174	1422489	1676213			2015	2323000	2005000	1216000	1535000	1752000			2015	2324000	2009000	1220000	1566000	1754000			2015	4459105
North American, sea ice extents								North American, sea ice extents								North American, sea ice extents								Nordic, sea ice extents								Nordic, sea ice extents								Nordic, sea ice extents								Siberian, sea ice extents
Satellite								T-based proxy (unadj)								T-based proxy (MW09-adj)								Satellite								T-based proxy (unadj)								T-based proxy (MW09-adj)								Satellite
1979-2015	Winter	Spring	Summer	Autumn	Annual			1979-2015	Winter	Spring	Summer	Autumn	Annual			1979-2015	Winter	Spring	Summer	Autumn	Annual			1979-2015	Winter	Spring	Summer	Autumn	Annual			1979-2015	Winter	Spring	Summer	Autumn	Annual			1979-2015	Winter	Spring	Summer	Autumn	Annual			1979-2015	Winter
Mean	5752000	5687000	3427000	5285000	5037000			Mean	5752000	5687000	3427000	5286000	5038000			Mean	5752000	5686000	3427000	5286000	5038000			Mean	2539000	2403000	1306000	1944000	2048000			Mean	2539000	2404000	1307000	1951000	2049000			Mean	2539000	2403000	1306000	1944000	2048000			Mean	4459000
S.D.	90000	67000	341000	295000	163000			S.D.	47000	19000	246000	219000	124000			S.D.	44000	19000	257000	220000	119000			S.D.	302000	277000	184000	251000	228000			S.D.	211000	219000	111000	200000	182000			S.D.	210000	216000	105000	182000	180000			S.D.	3000
[truncated: 34 more columns]

## Sheet: 07 Walsh - original
North American, sea ice extent (million km2)								Nordic, sea ice extent (million km2)								Siberian, sea ice extent (million km2)								Not Arctic, sea ice extent (million km2)							Total Arctic							Total, sea ice extent (million km2)
Year	Winter	Spring	Summer	Autumn	Annual			Year	Winter	Spring	Summer	Autumn	Annual			Year	Winter	Spring	Summer	Autumn	Annual			Year	Winter	Spring	Summer	Autumn	Annual		Year	Winter	Spring	Summer	Autumn	Annual		Year	Winter	Spring	Summer	Autumn	Annual
1901	6173827	6112089	4408113	6075046	5692269			1901	2951089	2901699	1987972	2568312	2602268			1901	4580980	4580980	4284636	4580980	4506894			1901	2259621	1716324	0	1000160	980610		1901	13706000	13595000	10681000	13224000	13187810		1901	1.59779e+07	14255367	9515926	1.30021e+07	13187810
1902	6161480	6025655	4062378	6062698	5578053			1902	3049871	3198042	1901539	2568312	2679441			1902	4580980	4580980	4482199	4580980	4556285			1902	2222578	864336	0	1000160	902408		1902	13792000	13805000	10446000	13212000	13289163		1902	15998444	14350033	9843139	12965037	13289163
1903	6173827	6075046	4161160	6062698	5618183			1903	2901699	3012828	1975625	2568312	2614616			1903	4580980	4580980	4185855	4580980	4482199			1903	2222578	913726	0	1000160	921444		1903	13657000	13669000	10323000	13212000	13127615		1903	1.59141e+07	14156586	9485057	12954747	13127615
1904	6186175	6173827	4111769	6075046	5636704			1904	2877003	2691789	1580500	2580660	2432488			1904	4580980	4580980	4272288	4580980	4503807			1904	2222578	1049551	0	1000160	926074		1904	13644000	13447000	9965000	13237000	13040152		1904	1.58873e+07	13884938	9.4048e+06	1.29836e+07	13040152
1905	6161480	6000960	4025335	6062698	5562618			1905	3000480	3000480	1790410	2568312	2589921			1905	4580980	4580980	4099421	4580980	4460590			1905	2222578	1000160	24695	1000160	933277		1905	13743000	13582000	9915000	13212000	13097774		1905	1.5984e+07	1.40331e+07	9.40891e+06	1.2965e+07	13097774
1906	6186175	6149132	4334027	6062698	5683008			1906	2926394	2988132	1901539	2568312	2596094			1906	4580980	4580980	4124117	4580980	4466764			1906	2222578	1123637	24695	1000160	948197		1906	13694000	13718000	10360000	13212000	13197585		1906	1.5947e+07	1.43624e+07	9.51593e+06	1.2965e+07	13197585
1907	6272608	6260261	4136464	6062698	5683008			1907	2938742	2901699	1827453	2568312	2559052			1907	4580980	4580980	4124117	4580980	4466764			1907	2222578	629730	24695	1000160	859705		1907	13792000	13743000	10088000	13212000	13114753		1907	1.59943e+07	1.40002e+07	9.47477e+06	12989732	13114753
1908	6173827	6173827	4395765	6062698	5701529			1908	2926394	2926394	1481719	2568312	2475705			1908	4580980	4580980	4383417	4580980	4531589			1908	2247273	1185375	0	1000160	984726		1908	13681000	13681000	10261000	13212000	13229483		1908	1.59614e+07	1.44612e+07	9517984	1.29774e+07	13229483
1909	6198523	6136784	4247593	6062698	5661400			1909	2938742	3074566	1889191	2568312	2617703			1909	4580980	4580980	4148812	4580980	4472938			1909	2234925	1173027	98781	1024855	986783		1909	13718000	13792000	10286000	13212000	13294308		1909	1.59532e+07	1.45764e+07	9668214	1.29794e+07	13294308
1910	6161480	6050351	4148812	6062698	5605835			1910	2914046	2889351	1938582	2617703	2589921			1910	4580980	4580980	4173507	4580980	4479112			1910	2259621	1815105	98781	1000160	1126209		1910	13657000	13521000	10261000	13261000	13380742		1910	1.59593e+07	1.48728e+07	9647634	1.30432e+07	13380742
1911	6223218	6161480	4358722	6062698	5701530			1911	3074566	3296824	1889191	2568312	2707223			1911	4580980	4580980	4185855	4580980	4482199			1911	2222578	1123637	86434	1000160	993472		1911	13879000	14039000	10434000	13212000	13440422		1911	16091052	14831591	9791690	1.30474e+07	13440422
1912	6198523	6223218	4358722	6062698	5710790			1912	3037523	3333867	2074406	2568312	2753527			1912	4580980	4580980	4235245	4580980	4494546			1912	2222578	1086594	98781	1000160	978037		1912	13817000	14138000	10668000	13212000	13513479		1912	1.6089e+07	1.48028e+07	1.01477e+07	1.30144e+07	13513479
1913	6186175	6124437	4506894	6062698	5720051			1913	2901699	3062218	2395445	2568312	2731919			1913	4580980	4580980	4210550	4580980	4488373			1913	2222578	1148332	111129	1000160	980609		1913	13669000	13768000	11113000	13212000	13480037		1913	1.59511e+07	1.44776e+07	10456406	1.3035e+07	13480037
1914	6235565	6210870	4408113	6062698	5729312			1914	2963437	3062218	1950929	2568312	2636224			1914	4580980	4580980	4185855	4580980	4482199			1914	2234925	1210070	234605	1000160	1026913		1914	13780000	13854000	10545000	13212000	13394118		1914	1.60499e+07	1.47122e+07	9.86783e+06	1.29465e+07	13394118
1915	6223218	6161480	4420460	6062698	5716964			1915	2864656	3025175	2012668	2568312	2617703			1915	4580980	4580980	4099421	4580980	4460590			1915	2222578	1037203	135824	1000160	965689		1915	13669000	13768000	10533000	13212000	13303054		1915	1.59346e+07	1.4313e+07	9966615	12997964	13303054
1916	6186175	6198523	4692109	6062698	5784876			1916	2926394	3148652	2309011	2593007	2744266			1916	4580980	4580980	4148812	4580980	4472938			1916	2222578	1111289	61738	1000160	970320		1916	13694000	13928000	11150000	13237000	13529942		1916	1.59676e+07	14621681	1.04379e+07	1.30926e+07	13529942
1917	6198523	6223218	4519242	6062698	5750920			1917	3123957	3444996	2247273	2568312	2846135			1917	4580980	4580980	4173507	4580980	4479112			1917	2222578	1173027	49391	1000160	984211		1917	13903000	14249000	10940000	13212000	13651875		1917	16142500	1.49962e+07	1.0442e+07	1.30268e+07	13651875
1918	6186175	6284956	4704456	6062698	5809571			1918	3012828	3370910	2234925	2568312	2796744			1918	4580980	4580980	4198202	4580980	4485286			1918	2222578	1234765	37043	1012508	988327		1918	13780000	14237000	11138000	13212000	13634383		1918	16039603	1.49756e+07	10518144	1.30041e+07	13634383
1919	6198523	6247913	4618023	6062698	5781789			1919	2914046	3062218	1839801	2568312	2596094			1919	4580980	4580980	4198202	4580980	4485286			1919	2234925	1345894	24695	1000160	1018167		1919	13694000	13891000	10656000	13212000	13424473		1919	1.60334e+07	14703999	9991310	1.29692e+07	13424473
1920	6235565	6260261	4704456	6062698	5815745			1920	2889351	2815265	1790410	2568312	2515835			1920	4580980	4580980	4272288	4580980	4503807			1920	2222578	1210070	111129	1024855	1004790		1920	13706000	13657000	10767000	13212000	13391546		1920	1.5984e+07	1.43006e+07	1.02918e+07	1.29897e+07	13391546
1921	6173827	6235565	4420460	6062698	5723138			1921	2914046	2852308	1728672	2568312	2515835			1921	4580980	4580980	4124117	4580980	4466764			1921	2247273	1876843	86434	1037203	1073217		1921	13669000	13669000	10273000	13212000	13328778		1921	15981981	14625797	9.72584e+06	12981500	13328778
1922	6198523	6173827	4506894	6062698	5735486			1922	2951089	2901699	1481719	2568312	2475705			1922	4580980	4580980	3975945	4580980	4429721			1922	2247273	1506414	74086	1000160	1048007		1922	13731000	13657000	9965000	13212000	13258809		1922	1.60293e+07	14539363	9482999	1.29836e+07	13258809
1923	6161480	6112089	4420460	6062698	5689182			1923	2889351	2914046	1728672	2568312	2525095			1923	4580980	4580980	3852468	4580980	4398852			1923	2222578	1321199	49391	1012508	1030000		1923	13632000	13607000	10002000	13212000	13212505		1923	1.591e+07	14522900	9464477	12952689	13212505
1924	6210870	6173827	4161160	6062698	5652139			1924	2889351	2765875	1494066	2518921	2417053			1924	4580980	4580980	4012988	4580980	4438982			1924	2234925	1642238	0	1000160	1088652		1924	13681000	13521000	9668000	13163000	13229483		1924	1.59758e+07	1.46793e+07	9.30602e+06	12956805	13229483
1925	6186175	6173827	4346374	6062698	5692269			1925	2864656	2469531	1469371	2555964	2339881			1925	4580980	4580980	4111769	4580980	4463677			1925	2222578	1321199	0	1000160	1000674		1925	13632000	13224000	9928000	13200000	13081825		1925	1.58626e+07	1.40619e+07	9437724	1.2965e+07	13081825
1926	6186175	6124437	4408113	6062698	5695356			1926	2889351	2790570	1889191	2568312	2534356			1926	4580980	4580980	4173507	4580980	4479112			1926	2247273	1432328	0	1037203	1055725		1926	13657000	13496000	10471000	13212000	13296881		1926	1.59449e+07	1.45229e+07	9754647	1.2965e+07	13296881
1927	6161480	6099741	4309331	6062698	5658313			1927	2889351	2938742	1926234	2568312	2580660			1927	4580980	4580980	4222898	4580980	4491460			1927	2247273	1506414	49391	1000160	1075789		1927	13632000	13619000	10458000	13212000	13348843		1927	1.59244e+07	1.47945e+07	9.70937e+06	1.29671e+07	13348843
1928	6161480	6075046	4395765	6062698	5673747			1928	2889351	3037523	1728672	2568312	2555965			1928	4580980	4580980	4296984	4580980	4509981			1928	2247273	1308851	12348	1000160	1027942		1928	13632000	13694000	10421000	13212000	13291221		1928	1.59326e+07	1.45229e+07	9.68673e+06	13022659	13291221
1929	6186175	6087394	4334027	6062698	5667574			1929	2963437	3173347	1815105	2518921	2617703			1929	4580980	4580980	4309331	4580980	4513068			1929	2247273	1469371	24695	1000160	1062413		1929	13731000	13842000	10458000	13163000	13406466		1929	1.60417e+07	14868634	9.75876e+06	1.29568e+07	13406466
1930	6161480	6050351	4506894	6062698	5695356			1930	2864656	2802918	1370590	2543617	2395445			1930	4580980	4580980	4284636	4580980	4506894			1930	2234925	1259461	0	1024855	1011479		1930	13607000	13434000	10162000	13187000	13113724		1930	1.58688e+07	14234788	9.37187e+06	1.29794e+07	13113724
1931	6161480	6050351	4358722	6062698	5658313			1931	2877003	2580660	1469371	2568312	2373837			1931	4580980	4580980	4247593	4580980	4497633			1931	2259621	1358242	0	1000160	1009935		1931	13619000	13212000	10076000	13212000	13110122		1931	15914069	1.40825e+07	9.48094e+06	1.2963e+07	13110122
1932	6161480	6112089	4432808	6062698	5692269			1932	2889351	2938742	1543457	2531269	2475705			1932	4580980	4580980	3988292	4580980	4432808			1932	2247273	1382937	0	1012508	1048007		1932	13632000	13632000	9965000	13175000	13197070		1932	1.59285e+07	14580522	9322479	1.29568e+07	13197070
1933	6173827	6136784	4543937	6062698	5729312			1933	2864656	2543617	1481719	2568312	2364576			1933	4580980	4580980	4198202	4580980	4485286			1933	2247273	1481719	37043	1037203	1068072		1933	13619000	13261000	10224000	13212000	13162600		1933	15912011	14230672	9495346	1.30124e+07	13162600
1934	6235565	6173827	4667413	6062698	5784876			1934	3173347	3210390	2309011	2593007	2821439			1934	4580980	4580980	4358722	4580980	4525416			1934	2296664	2074406	12348	1037203	1218816		1934	13990000	13965000	11335000	13237000	13820112		1934	1.62948e+07	1.54942e+07	10392609	13098803	13820112
1935	6272608	6235565	4358722	6062698	5732398			1935	2963437	2938742	1839801	2531269	2568312			1935	4580980	4580980	4309331	4580980	4513068			1935	2346054	2099101	61738	1037203	1226534		1935	13817000	13755000	10508000	13175000	13548464		1935	1.61775e+07	1.52926e+07	9744357	1.29794e+07	13548464
1936	6272608	6223218	4296984	6062698	5713877			1936	2877003	2926394	1358242	2568312	2432488			1936	4580980	4580980	4222898	4580980	4491460			1936	2309011	2012668	12348	1037203	1174571		1936	13731000	13731000	9878000	13212000	13361705		1936	1.6089e+07	15173209	9223698	1.29609e+07	13361705
1937	6235565	6198523	4519242	6062698	5754007			1937	2901699	2815265	1728672	2568312	2503487			1937	4580980	4580980	4259941	4580980	4500720			1937	2247273	1926234	24695	1037203	1155535		1937	13718000	13595000	10508000	13212000	13408009		1937	1.59902e+07	1.49016e+07	9.76288e+06	1.29774e+07	13408009
1938	6223218	6210870	4358722	6062698	5713877			1938	2938742	2914046	1469371	2518921	2460270			1938	4580980	4580980	3617863	4580980	4340201			1938	2247273	1568152	0	1012508	1092253		1938	13743000	13706000	9446000	13163000	13181636		1938	16014908	14843939	8.91295e+06	12954747	13181636
1939	6247913	6247913	4383417	6062698	5735485			1939	2889351	2728832	1642238	2568312	2457183			1939	4580980	4580980	4568632	4580980	4577893			1939	2247273	1802758	0	1000160	1116948		1939	13718000	13558000	10594000	13212000	13422930		1939	1.59676e+07	1.47863e+07	9.96662e+06	1.29712e+07	13422930
1940	6186175	6124437	3778382	6062698	5537923			1940	2901699	2617703	1444676	2568312	2383098			1940	4580980	4580980	4000640	4580980	4435895			1940	2247273	1592847	0	1000160	1057782		1940	13669000	13323000	9224000	13212000	13055587		1940	15949054	1.43665e+07	8.93764e+06	1.29692e+07	13055587
1941	6186175	6124437	3778382	6062698	5537923			1941	2901699	2617703	1444676	2568312	2383098			1941	4580980	4580980	4000640	4580980	4435895			1941	2247273	1592847	0	1000160	1057782		1941	13669000	13323000	9224000	13212000	13055587		1941	15949054	1.43665e+07	8.93764e+06	1.29692e+07	13055587
1942	6186175	6124437	3778382	6062698	5537923			1942	2901699	2617703	1444676	2568312	2383098			1942	4580980	4580980	4000640	4580980	4435895			1942	2247273	1592847	0	1000160	1057782		1942	13669000	13323000	9224000	13212000	13055587		1942	15949054	1.43665e+07	8.93764e+06	1.29692e+07	13055587
1943	6186175	6124437	3778382	6062698	5537923			1943	2901699	2617703	1444676	2568312	2383098			1943	4580980	4580980	4000640	4580980	4435895			1943	2247273	1592847	0	1000160	1057782		1943	13669000	13323000	9224000	13212000	13055587		1943	15949054	1.43665e+07	8.93764e+06	1.29692e+07	13055587
1944	6186175	6124437	3778382	6062698	5537923			1944	2901699	2617703	1444676	2568312	2383098			1944	4580980	4580980	4000640	4580980	4435895			1944	2247273	1592847	0	1000160	1057782		1944	13669000	13323000	9224000	13212000	13055587		1944	15949054	1.43665e+07	8.93764e+06	1.29692e+07	13055587
1945	6186175	6124437	3778382	6062698	5537923			1945	2901699	2617703	1444676	2568312	2383098			1945	4580980	4580980	4000640	4580980	4435895			1945	2247273	1592847	0	1000160	1057782		1945	13669000	13323000	9224000	13212000	13055587		1945	15949054	1.43665e+07	8.93764e+06	1.29692e+07	13055587
1946	6173827	6186175	4753847	6062698	5794137			1946	2889351	3037523	1506414	2568312	2500400			1946	4580980	4580980	4580980	4580980	4580980			1946	2370750	2284316	283996	1037203	1313482		1946	13644000	13805000	10841000	13212000	13761975		1946	16080762	15490133	10481101	1.29959e+07	13761975
1947	6161480	6025655	4593327	6062698	5710790			1947	2877003	2877003	1629890	2568312	2488052			1947	4580980	4580980	4580980	4580980	4580980			1947	2296664	2667093	98781	1037203	1275924		1947	13619000	13484000	10804000	13212000	13622035		1947	1.59696e+07	1.52432e+07	10281480	12993848	13622035
1948	6186175	6186175	4445156	6062698	5720051			1948	2914046	3099261	1790410	2555964	2589920			1948	4580980	4580980	4580980	4580980	4580980			1948	2321359	2173187	172867	1037203	1268721		1948	13681000	13866000	10817000	13200000	13740367		1948	16062241	1.55272e+07	1.03473e+07	1.30247e+07	13740367
1949	6223218	6247913	4642718	6062698	5794137			1949	2914046	3210390	2062058	2568312	2688702			1949	4580980	4580980	4580980	4580980	4580980			1949	2395445	2444836	185215	1037203	1332003		1949	13718000	14039000	11286000	13212000	13924038		1949	1.61816e+07	1.58564e+07	10645736	1.30124e+07	13924038
1950	6186175	6223218	4741499	6062698	5803398			1950	2926394	3062218	2049711	2568312	2651659			1950	4580980	4580980	4580980	4580980	4580980			1950	2296664	2234925	209910	1037203	1299076		1950	13694000	13866000	11372000	13212000	13838119		1950	1.60561e+07	1.56671e+07	1.06375e+07	12991790	13838119
1951	6186175	6260261	4469851	6062698	5744746			1951	2864656	3111609	2012668	2568312	2639311			1951	4580980	4580980	4580980	4580980	4580980			1951	2309011	2346054	234605	1037203	1283127		1951	13632000	13953000	11063000	13212000	13814453		1951	1.60026e+07	1.56671e+07	1.05614e+07	1.30268e+07	13814453
1952	6223218	6223218	4618023	6075046	5784876			1952	3012828	3099261	1950929	2568312	2657833			1952	4580980	4580980	4580980	4580980	4580980			1952	2370750	2444836	209910	1049551	1315540		1952	13817000	13903000	11150000	13224000	13906546		1952	16220702	1.55848e+07	1.07816e+07	13039123	13906546
1953	6161480	6062698	4087074	5963917	5568792			1953	3161000	3012828	1839801	2333707	2586834			1953	4580980	4580980	4087074	4580980	4457504			1953	2481879	2025015	86434	901379	1100485		1953	13903000	13657000	10014000	12879000	13240287		1953	16119863	1.4741e+07	9.625e+06	1.24752e+07	13240287
1954	6149132	6124437	3914206	5976265	5541010			1954	3049871	3136304	1691629	2358402	2559052			1954	4580980	4580980	4037683	4580980	4445156			1954	2469531	2049711	61738	950769	1119521		1954	13780000	13842000	9644000	12916000	13128129		1954	1.60355e+07	1.46834e+07	9.33071e+06	1.24629e+07	13128129
1955	6161480	6186175	3963597	5877483	5547184			1955	3111609	3198042	1679281	2321359	2577573			1955	4580980	4580980	4087074	4580980	4457504			1955	2370750	1802758	61738	1123637	1141644		1955	13854000	13965000	9730000	12780000	13232570		1955	15979923	14860402	9515926	1.2574e+07	13232570
1956	6136784	6038003	4185855	6075046	5608922			1956	3062218	3025175	1741019	2346054	2543617			1956	4580980	4580980	4050031	4580980	4448243			1956	2568312	1950929	12348	1358242	1214701		1956	13780000	13644000	9977000	13002000	13354503		1956	16008734	1.47596e+07	9577664	13072050	13354503
1957	6235565	6050351	4259941	6013308	5639791			1957	2877003	2901699	1568152	2642398	2497313			1957	4580980	4580980	3901859	4580980	4411200			1957	2790570	1617543	0	963117	1105115		1957	13694000	13533000	9730000	13237000	12972240		1957	15992270	1.41072e+07	8.92941e+06	1.28601e+07	12972240
1958	6210870	6136784	3753687	6013308	5528662			1958	3025175	2765875	1691629	2518921	2500400			1958	4580980	4580980	3889511	4580980	4408113			1958	2395445	1395285	0	963117	986783		1958	13817000	13484000	9335000	13113000	12766960		1958	15912011	13798504	8.57339e+06	1.27839e+07	12766960
1959	6161480	6173827	4210550	6050351	5649052			1959	3136304	3000480	1815105	2444836	2599181			1959	4580980	4580980	3901859	4580980	4411200			1959	2716484	1852148	0	1024855	1137013		1959	13879000	13755000	9928000	13076000	13094173		1959	1.62619e+07	1.46093e+07	9007614	1.24979e+07	13094173
1960	6124437	6099741	3901859	5889831	5503967			1960	2852308	2716484	1469371	2432488	2367663			1960	4580980	4580980	3963597	4580980	4426634			1960	2296664	1778062	12348	975465	1041833		1960	13558000	13397000	9335000	12903000	12714483		1960	1.56836e+07	1.40887e+07	8.41493e+06	1.26708e+07	12714483
1961	6124437	6025655	3889511	5951569	5497793			1961	3123957	3099261	1827453	2284316	2583747			1961	4580980	4580980	3778382	4580980	4380331			1961	2432488	1666933	0	876683	1060869		1961	13829000	13706000	9495000	12817000	13028833		1961	1.60334e+07	1.45126e+07	8.85944e+06	1.27099e+07	13028833
1962	6186175	6062698	4074726	5902179	5556445			1962	2963437	3000480	1938582	2728832	2657833			1962	4580980	4580980	4074726	4580980	4454417			1962	2148492	1617543	0	1049551	1004790		1962	13731000	13644000	10088000	13212000	13293793		1962	1.56774e+07	1.46484e+07	9746415	13102919	13293793
1963	6050351	6099741	4469851	6038003	5664487			1963	3370910	2988132	2025015	2457183	2710310			1963	4580980	4580980	4050031	4580980	4448243			1963	2395445	1839801	12348	1123637	1067558		1963	14002000	13669000	10545000	13076000	13422415		1963	16261861	1.45167e+07	10042759	1.28683e+07	13422415
1964	6198523	6136784	4395765	5926874	5664487			1964	3111609	2790570	1716324	2580660	2549791			1964	4580980	4580980	4111769	4580980	4463677			1964	2432488	1568152	0	1197722	1105630		1964	13891000	13508000	10224000	13089000	13379712		1964	1.6054e+07	1.43665e+07	1.00819e+07	1.30165e+07	13379712
1965	6099741	6038003	4247593	5976265	5590401			1965	3247433	2938742	2086754	2667093	2735006			1965	4580980	4580980	4111769	4580980	4463677			1965	2370750	1580500	12348	1049551	1023826		1965	13928000	13558000	10446000	13224000	13388973		1965	1.60252e+07	1.43212e+07	9.9378e+06	1.32717e+07	13388973
1966	6149132	6062698	3877163	6087394	5544097			1966	3556124	3136304	1938582	2679441	2827613			1966	4580980	4580980	4395765	4580980	4534676			1966	2111449	1506414	0	1123637	980610		1966	14286000	13780000	10212000	13348000	13285047		1966	1.60273e+07	1.45023e+07	9.56737e+06	13043239	13285047
1967	6223218	6272608	4358722	6062698	5729312			1967	3210390	2778222	1963277	3000480	2738092			1967	4580980	4568632	4037683	4580980	4442069			1967	2210230	1382937	0	1024855	967747		1967	14015000	13619000	10360000	13644000	13405951		1967	16012850	1.4278e+07	9937804	1.33951e+07	13405951
1968	6247913	6173827	3815425	6013308	5562618			1968	3519082	3370910	2197882	3272128	3090001			1968	4580980	4580980	3506734	4580980	4312419			1968	2173187	1481719	0	1148332	941509		1968	14348000	14126000	9520000	13866000	13339583		1968	1.61343e+07	1.47616e+07	8.9788e+06	13483639	13339583
1969	6198523	6198523	4445156	6099741	5735486			1969	3728992	3543777	2185535	2753527	3052958			1969	4580980	4580980	4259941	4580980	4500720			1969	2086754	1741019	49391	1000160	950255		1969	14508000	14323000	10891000	13434000	13556695		1969	16255687	1.49448e+07	1.01539e+07	1.28724e+07	13556695
1970	6235565	6149132	4358722	6038003	5695356			1970	3346214	2815265	1716324	2667093	2636224			1970	4580980	4580980	4198202	4580980	4485286			1970	2469531	1703976	37043	889031	1029486		1970	14163000	13545000	10273000	13286000	13303569		1970	1.61096e+07	14446756	9.57972e+06	1.30782e+07	13303569
1971	6235565	6161480	4235245	6260261	5723138			1971	3235085	3000480	1778062	2889351	2725745			1971	4580980	4580980	3654906	4580980	4349462			1971	2617703	1926234	12348	938422	1114376		1971	14052000	13743000	9668000	13731000	13167745		1971	16364758	14732810	8719502	12853908	13167745
1972	6321999	6161480	4778542	6173827	5858962			1972	3037523	2901699	1345894	2284316	2392358			1972	4580980	4580980	4185855	4580980	4482199			1972	2654746	1691629	0	1210070	1106144		1972	13941000	13644000	10310000	13039000	13331351		1972	1.61857e+07	1.45846e+07	9565316	1.29897e+07	13331351
1973	6223218	6149132	3963597	5963917	5574966			1973	2901699	2580660	1580500	2790570	2463357			1973	4580980	4580980	3889511	4580980	4408113			1973	2457183	1617543	12348	753207	1013022		1973	13706000	13311000	9434000	13335000	12899698		1973	1.58894e+07	1.40969e+07	8.88414e+06	1.27284e+07	12899698
1974	6186175	6149132	3728992	6062698	5531749			1974	2630050	2630050	1531109	2370750	2290490			1974	4580980	4580980	3914206	4580980	4414287			1974	2383097	1284156	0	975465	987298		1974	13397000	13360000	9174000	13014000	12821496		1974	1.56136e+07	1.40434e+07	8.79565e+06	1.28333e+07	12821496
1975	6260261	6099741	3580820	6075046	5503967			1975	2864656	2506574	1642238	2667093	2420140			1975	4580980	4580980	3728992	4580980	4367983			1975	2593007	1481719	12348	938422	1018167		1975	13706000	13187000	8952000	13323000	12905872		1975	15912011	1.39508e+07	8.74214e+06	1.30185e+07	12905872
1976	6346694	6136784	3889511	5926874	5574966			1976	2802918	2568312	1531109	2494226	2349141			1976	4580980	4580980	3877163	4580980	4405026			1976	2716484	1852148	0	1111289	1171998		1976	13731000	13286000	9298000	13002000	13126071		1976	1.60705e+07	1.42554e+07	9.05906e+06	1.31194e+07	13126071
1977	6087394	6062698	3679601	6000960	5457663			1977	3222738	3025175	1543457	2531269	2580660			1977	4580980	4580980	3654906	4580980	4349462			1977	2395445	1703976	0	864336	1049036		1977	13891000	13669000	8878000	13113000	12915646		1977	1.60087e+07	1.4455e+07	8.46432e+06	1.27345e+07	12915646
1978	6198523	6149132	4012988	5951569	5578053			1978	3025175	3000480	1691629	2827613	2636224			1978	4580980	4580980	3901859	4580980	4411200			1978	2062058	1098941	0	950769	860734		1978	13805000	13731000	9606000	13360000	13096746		1978	15693869	1.41854e+07	9.21135e+06	13296366	13096746
1979	6112089	6050351	3383257	5976265	5380491			1979	3420300	3000480	1197722	2222578	2460270			1979	4580980	4580980	3753687	4580980	4374157			1979	1987972	876683	12348	975465	853532		1979	14113000	13632000	8335000	12780000	12886321		1979	1.60931e+07	1.41833e+07	8.4993e+06	1.27695e+07	12886321
1980	6087394	6062698	3370910	6013308	5383578			1980	3012828	2481879	1407633	2617703	2380011			1980	4580980	4580980	3803078	4580980	4386505			1980	2222578	1333547	24695	864336	952827		1980	13681000	13126000	8582000	13212000	12994363		1980	1.60211e+07	13913749	8.92941e+06	1.31132e+07	12994363
1981	6149132	6038003	3259781	6050351	5374317			1981	3086914	3062218	1469371	2691789	2577573			1981	4580980	4580980	3531429	4580980	4318592			1981	2123797	777902	37043	814945	826779		1981	13817000	13681000	8261000	13323000	12821496		1981	1.57968e+07	14115427	8.69686e+06	1.26769e+07	12821496
1982	6247913	6161480	3444996	6161480	5503967			1982	3370910	2839961	1580500	2321359	2528183			1982	4580980	4580980	3741339	4580980	4371070			1982	2111449	1210070	24695	1086594	947683		1982	14200000	13582000	8767000	13064000	13251092		1982	16348295	1.43953e+07	8.94382e+06	1.33169e+07	13251092
1983	6359042	6149132	3926554	6136784	5642878			1983	2778222	2518921	1247113	2407793	2238012			1983	4580980	4580980	3766035	4580980	4377244			1983	2309011	913726	12348	703816	965175		1983	13718000	13249000	8940000	13126000	13066905		1983	16224818	13996066	9022019	1.30247e+07	13066905
1984	6321999	6210870	3543777	6124437	5550271			1984	2568312	2296664	1135984	2025015	2006494			1984	4580980	4580980	3716644	4580980	4364896			1984	2383097	1333547	24695	1049551	1044920		1984	13471000	13089000	8396000	12730000	12790627		1984	15905837	1.40249e+07	8.70304e+06	12528754	12790627
1985	6173827	6087394	3469691	5865136	5399012			1985	2778222	2704136	1123637	2370750	2244186			1985	4580980	4580980	3370910	4580980	4278463			1985	2728832	1605195	24695	592687	1061898		1985	13533000	13373000	7964000	12817000	12851850		1985	1.61487e+07	1.43583e+07	8.29351e+06	12606955	12851850
1986	6112089	6075046	3556124	6087394	5457663			1986	2988132	2802918	1370590	2346054	2376924			1986	4580980	4580980	3803078	4580980	4386505			1986	2160840	827293	24695	864336	846329		1986	13681000	13459000	8730000	13014000	12856481		1986	15780303	13761461	8.92118e+06	1.2963e+07	12856481
1987	6198523	6161480	3309171	6087394	5439142			1987	3210390	2741179	1506414	2654746	2528182			1987	4580980	4580980	3691949	4580980	4358722			1987	2160840	1111289	24695	1024855	969291		1987	13990000	13484000	8508000	13323000	13055587		1987	1.62392e+07	14123659	8.92118e+06	1.29383e+07	13055587
1988	6161480	6062698	3543777	5988612	5439142			1988	3086914	2778222	1568152	2815265	2562138			1988	4580980	4580980	3630210	4580980	4343288			1988	2111449	1049551	12348	679121	957458		1988	13829000	13422000	8742000	13385000	13153339		1988	16004618	1.40393e+07	9651750	1.29177e+07	13153339
1989	6247913	6075046	3519082	6075046	5479272			1989	3123957	2481879	1605195	2370750	2395445			1989	4580980	4580980	3395605	4580980	4284636			1989	2025015	518601	24695	728512	846843		1989	13953000	13138000	8520000	13027000	12919762		1989	15973749	13854069	8.88002e+06	1.29712e+07	12919762
1990	6260261	6161480	3346214	6124437	5473098			1990	2691789	2185535	1185375	2111449	2043537			1990	4580980	4543937	2630050	4580980	4083987			1990	2296664	691469	0	716164	822148		1990	13533000	12891000	7162000	12817000	12078064		1990	15833809	1.30391e+07	7.13694e+06	12302380	12078064
1991	6272608	6112089	3593167	6013308	5497793			1991	2691789	2333707	1247113	2074406	2086754			1991	4580980	4580980	2852308	4580980	4148812			1991	2173187	1049551	24695	802598	855075		1991	13545000	13027000	7693000	12669000	12152150		1991	1.53564e+07	1.35166e+07	7.52795e+06	1.22077e+07	12152150
1992	6223218	6124437	3864816	6136784	5587314			1992	2617703	2037363	1370590	2173187	2049711			1992	4580980	4580980	3519082	4580980	4315506			1992	2136144	1037203	0	1000160	875655		1992	13422000	12743000	8754000	12891000	12574028		1992	15525118	13434248	8.5775e+06	12759243	12574028
1993	6359042	6210870	3161000	6112089	5460750			1993	2518921	2370750	1469371	2210230	2142318			1993	4580980	4580980	2889351	4580980	4158073			1993	2247273	777902	0	864336	845814		1993	13459000	13163000	7520000	12903000	12347655		1993	1.58173e+07	1.3319e+07	7.71728e+06	1.2537e+07	12347655
1994	6198523	6025655	3333867	6000960	5389751			1994	2728832	2432488	1247113	2197882	2151579			1994	4580980	4580980	3593167	4580980	4334027			1994	2222578	1197722	24695	987812	888002		1994	13508000	13039000	8174000	12780000	12426885		1994	1.56692e+07	13364278	8.19061e+06	1.24835e+07	12426885
1995	6247913	5963917	3235085	5988612	5358882			1995	2494226	2111449	1284156	2494226	2096014			1995	4580980	4519242	2580660	4580980	4065466			1995	2271968	876683	0	370430	760410		1995	13323000	12595000	7100000	13064000	11906226		1995	15525118	12726316	7034047	1.23394e+07	11906226
1996	6136784	6000960	3506734	5939222	5395925			1996	2778222	2568312	1197722	2210230	2188622			1996	4580980	4580980	4050031	4580980	4448243			1996	1703976	493906	0	419820	596803		1996	13496000	13150000	8754000	12730000	12249902		1996	1.51382e+07	1.32573e+07	8.58162e+06	1.20225e+07	12249902
1997	6161480	6013308	3123957	5939222	5309492			1997	3074566	2704136	1395285	2444836	2404706			1997	4580980	4580980	3074566	4580980	4204377			1997	1901539	617383	0	703816	690440		1997	13817000	13298000	7594000	12965000	12167585		1997	15595088	1.31379e+07	7.58558e+06	1.23518e+07	12167585
1998	6161480	5976265	2667093	5914526	5179841			1998	3148652	2790570	1432328	2284316	2413967			1998	4580980	4580980	3803078	4580980	4386505			1998	2234925	1024855	0	642078	806713		1998	13891000	13348000	7902000	12780000	12196396		1998	1.58544e+07	1.32326e+07	7.76667e+06	1.1932e+07	12196396
1999	6161480	6038003	3284476	5951569	5358882			1999	2630050	2543617	1234765	1889191	2074406			1999	4580980	4580980	3469691	4580980	4303158			1999	2074406	1197722	0	716164	855075		1999	13373000	13163000	7989000	12422000	12101731		1999	1.55045e+07	13298424	7.58146e+06	12022500	12101731
2000	6136784	6000960	3235085	5889831	5315665			2000	2481879	2222578	1247113	2012668	1991060			2000	4580980	4580980	3000480	4580980	4185855			2000	2321359	963117	0	605035	822148		2000	13200000	12805000	7483000	12483000	11937095		2000	1.54222e+07	13100861	7.38801e+06	1.18373e+07	11937095
2001	6124437	6025655	3247433	5519402	5229232			2001	2790570	2383097	1024855	2037363	2058971			2001	4580980	4580980	3420300	4580980	4290810			2001	1889191	987812	12348	876683	744975		2001	13496000	12990000	7693000	12138000	11922689		2001	15261701	1.29321e+07	7.63085e+06	1.18661e+07	11922689
2002	6124437	6025655	3099261	5902179	5287883			2002	2704136	2296664	1111289	2123797	2058972			2002	4580980	4580980	2914046	4580980	4164247			2002	2025015	777902	12348	580340	713077		2002	13410000	12903000	7125000	12607000	11766286		2002	15401641	1.28786e+07	6959961	11824937	11766286
2003	6112089	6000960	3012828	5754007	5219971			2003	2790570	2383097	1284156	2148492	2151579			2003	4580980	4580980	2926394	4580980	4167334			2003	1950929	543297	0	469211	652368		2003	13484000	12965000	7223000	12483000	11774518		2003	1.53564e+07	1.29198e+07	7.18633e+06	1.16356e+07	11774518
2004	6050351	5963917	3086914	5926874	5257014			2004	2753527	2160840	901379	1938582	1938582			2004	4580980	4580980	3346214	4580980	4272289			2004	1605195	395125	0	592687	573137		2004	13385000	12706000	7335000	12446000	11585187		2004	14915967	1.26975e+07	7182219	11545057	11585187
2005	6050351	5951569	3123957	5828093	5238493			2005	2481879	2333707	1185375	1889191	1972538			2005	4580980	4580980	2271968	4494546	3982119			2005	1642238	691469	0	567992	614296		2005	13113000	12866000	6581000	12212000	11312510		2005	14701941	12652230	6.4249e+06	11470971	11312510
	Pre-satellite era (1901-1978)				Pre-satellite era (1901-1978)				Pre-satellite era (1901-1978)				Pre-satellite era (1901-1978)				Pre-satellite era (1901-1978)				Pre-satellite era (1901-1978)
	Winter American				Winter American				Winter Nordic				Winter Nordic				Winter Siberian				Winter Siberian
	Unadjusted	Unadjusted			MW09-adjusted	MW09-adjusted			Unadjusted	Unadjusted			MW09-adjusted	MW09-adjusted			Unadjusted	Unadjusted			MW09-adjusted	MW09-adjusted
slope	-3667.2	6.19199e+06	intercept	slope	-3452.19	6.19142e+06		slope	-56601.9	3.00108e+06	intercept	slope	-51799.2	2.99054e+06		slope	0	4580980	intercept	slope	0	4580980
+/-	2522.84	5222.87	+/-	+/-	2469.67	5312.81		+/-	13222.8	18123.3	+/-	+/-	13826.6	18478.7		+/-	0	0	+/-	+/-	0	0
r2	0.0270499	45596.6	s(y)	r2	0.0250655	45643.1		r2	0.194265	159299	s(y)	r2	0.155885	163049		r2	1	0	s(y)	r2	1	0
F	2.11294	76	degrees of freedom	F	1.95395	76		F	18.3239	76	degrees of freedom	F	14.0351	76		F	#NUM!	76	degrees of freedom	F	#NUM!	76
regression ss	4.39292e+09	1.58008e+11	residual ss	regression ss	4.07066e+09	1.5833e+11		regression ss	4.64988e+11	1.92858e+12	residual ss	regression ss	3.73121e+11	2.02045e+12		regression ss	0	0	residual ss	regression ss	0	0
p	0.150175			p	0.166228			p	5.37692e-05			p	0.000347329			p	#DIV/0!			p	#DIV/0!
	Spring American				Spring American				Spring Nordic				Spring Nordic				Spring Siberian				Spring Siberian
	Unadjusted	Unadjusted			MW09-adjusted	MW09-adjusted			Unadjusted	Unadjusted			MW09-adjusted	MW09-adjusted			Unadjusted	Unadjusted			MW09-adjusted	MW09-adjusted
slope	-8845.45	6.14565e+06			-9667.37	6.14338e+06		slope	-123896	2.97002e+06		slope	-114269	2.95002e+06		slope	-183.024	4.58083e+06		slope	-196.257	4.58081e+06
+/-	7552.52	7769.73			7226.17	8027.78		+/-	37180.5	26331		+/-	37436.3	25015.7		+/-	154.353	157.961		+/-	156.228	158.028
r2	0.0177286	68451.9			0.0230079	68267.7		r2	0.127481	215450		r2	0.109203	217695		r2	0.0181638	1394.46		r2	0.020342	1392.92
F	1.37169	76			1.78978	76		F	11.1041	76		F	9.31687	76		F	1.40599	76		F	1.57809	76
regression ss	6.42727e+09	3.5611e+11			8.34123e+09	3.54196e+11		regression ss	5.15441e+11	3.52783e+12		regression ss	4.41538e+11	3.60174e+12		regression ss	2.73399e+06	1.47784e+08		regression ss	3.06184e+06	1.47456e+08
p	0.245181				0.184942			p	0.00133246			p	0.00312762			p	0.239417			p	0.212883
	Summer American				Summer American				Summer Nordic				Summer Nordic				Summer Siberian				Summer Siberian
	Unadjusted	Unadjusted			MW09-adjusted	MW09-adjusted			Unadjusted	Unadjusted			MW09-adjusted	MW09-adjusted			Unadjusted	Unadjusted			MW09-adjusted	MW09-adjusted
slope	-116864	4.24637e+06			-141895	4.21122e+06		slope	-201354	1.84512e+06		slope	-216512	1.8081e+06		slope	-92603.7	4.13785e+06		slope	-125761	4.12653e+06
+/-	54588.4	33666.8			48508.4	36099.2		+/-	52930.8	33552.7		+/-	55312.1	28508.4		+/-	43814.4	26169.1		+/-	47141	26008.3
r2	0.0568745	293931			0.101194	286942		r2	0.159953	236007		r2	0.167782	234905		r2	0.0555144	231047		r2	0.0856258	227334
F	4.58312	76			8.55662	76		F	14.4712	76		F	15.3223	76		F	4.46708	76		F	7.11696	76
regression ss	3.95962e+11	6.56607e+12			7.04516e+11	6.25752e+12		regression ss	8.06033e+11	4.23314e+12		regression ss	8.45485e+11	4.19369e+12		regression ss	2.38464e+11	4.05707e+12		regression ss	3.67809e+11	3.92773e+12
p	0.0354949				0.00453633			p	0.000285829			p	0.000196095			p	0.0378356			p	0.00932814
	Autumn American				Autumn American				Autumn Nordic				Autumn Nordic				Autumn Siberian				Autumn Siberian
	Unadjusted	Unadjusted			MW09-adjusted	MW09-adjusted			Unadjusted	Unadjusted			MW09-adjusted	MW09-adjusted			Unadjusted	Unadjusted			MW09-adjusted	MW09-adjusted
slope	-977.827	6.04723e+06			-2088.55	6.04702e+06		slope	-51190.5	2.59026e+06		slope	-41530.1	2.57856e+06		slope	0	4580980		slope	0	4580980
+/-	3634.66	6316.83			3611.6	6262.02		+/-	14880	15514.2		+/-	15120.6	15216.2		+/-	0	0		+/-	0	0
r2	0.000951416	55399.7			0.00438095	55304.5		r2	0.134742	130113		r2	0.0902973	133413		r2	1	0		r2	1	0
F	0.0723765	76			0.334418	76		F	11.8351	76		F	7.54377	76		F	#NUM!	76		F	#NUM!	76
regression ss	2.22133e+08	2.33254e+11			1.02285e+09	2.32453e+11		regression ss	2.0036e+11	1.28663e+12		regression ss	1.34271e+11	1.35272e+12		regression ss	0	0		regression ss	0	0
p	0.788637				0.564779			p	0.000947193			p	0.00751459			p	#DIV/0!			p	#DIV/0!
	Annual American				Annual American				Annual Nordic				Annual Nordic				Annual Siberian				Annual Siberian
	Unadjusted	Unadjusted			MW09-adjusted	MW09-adjusted			Unadjusted	Unadjusted			MW09-adjusted	MW09-adjusted			Unadjusted	Unadjusted			MW09-adjusted	MW09-adjusted
slope	-25991.2	5.6604e+06		slope	-29681.2	5.65263e+06		slope	-122074	2.60454e+06		slope	-111398	2.57915e+06		slope	-6852.58	4.46975e+06		slope	-10577.6	4.46864e+06
+/-	11240.1	10246.2		+/-	10104.7	10433.1		+/-	24882.9	16935.8		+/-	25572.9	15820.8		+/-	8272.26	6701.91		+/-	9131.58	6749.81
r2	0.0657308	90470.3		r2	0.101952	88699.2		r2	0.24052	134328		r2	0.199793	137883		r2	0.00894835	59186.2		r2	0.0173488	58934.8
F	5.347	76		F	8.62803	76		F	24.0685	76		F	18.9754	76		F	0.686215	76		F	1.34179	76
regression ss	4.37645e+10	6.2205e+11		regression ss	6.78814e+10	5.97933e+11		regression ss	4.34295e+11	1.37135e+12		regression ss	3.60755e+11	1.44489e+12		regression ss	2.40382e+09	2.66228e+11		regression ss	4.66046e+09	2.63972e+11
p	0.023467			p	0.00437955			p	5.16455e-06			p	4.08776e-05			p	0.410049			p	0.250345

## Sheet: 08 Walsh - rescaled
Non-rescaled								Rescaled (unadjusted T)								Rescaled (MW09-adjusted T)								Non-rescaled								Rescaled (unadjusted T)								Rescaled (MW09-adjusted T)								Non-rescaled
North American, sea ice extent (million km2)								North American, sea ice extent (million km2)								North American, sea ice extent (million km2)								Nordic, sea ice extent (million km2)								Nordic, sea ice extent (million km2)								Nordic, sea ice extent (million km2)								Siberian, sea ice extent (million km2)
Year	Winter	Spring	Summer	Autumn	Annual			Year	Winter	Spring	Summer	Autumn	Annual			Year	Winter	Spring	Summer	Autumn	Annual			Year	Winter	Spring	Summer	Autumn	Annual			Year	Winter	Spring	Summer	Autumn	Annual			Year	Winter	Spring	Summer	Autumn	Annual			Year	Winter
1901	6173827	6112089	4408113	6075046	5692269			1901	5762000	5695000	3695000	6482000	5148000			1901	5763000	5700000	3938000	6574000	5204000			1901	2951089	2901699	1987972	2568312	2602268			1901	2723000	2423000	1371000	2115000	2181000			1901	2764000	2488000	1415000	2153000	2256000			1901	4580980
1902	6161480	6025655	4062378	6062698	5578053			1902	5738000	5673000	3188000	5379000	4883000			1902	5739000	5676000	3309000	5426000	4908000			1902	3049871	3198042	1901539	2568312	2679441			1902	3075000	2724000	1345000	2115000	2270000			1902	3098000	2809000	1388000	2153000	2351000			1902	4580980
1903	6173827	6075046	4161160	6062698	5618183			1903	5762000	5685000	3333000	5379000	4976000			1903	5763000	5690000	3489000	5426000	5012000			1903	2901699	3012828	1975625	2568312	2614616			1903	2547000	2536000	1367000	2115000	2195000			1903	2597000	2608000	1411000	2153000	2271000			1903	4580980
1904	6186175	6173827	4111769	6075046	5636704			1904	5787000	5710000	3260000	6482000	5019000			1904	5787000	5717000	3399000	6574000	5060000			1904	2877003	2691789	1580500	2580660	2432488			1904	2459000	2209000	1249000	2256000	1984000			1904	2513000	2260000	1288000	2289000	2046000			1904	4580980
1905	6161480	6000960	4025335	6062698	5562618			1905	5738000	5667000	3134000	5379000	4848000			1905	5739000	5669000	3242000	5426000	4868000			1905	3000480	3000480	1790410	2568312	2589921			1905	2899000	2523000	1312000	2115000	2167000			1905	2931000	2595000	1354000	2153000	2240000			1905	4580980
1906	6186175	6149132	4334027	6062698	5683008			1906	5787000	5704000	3587000	5379000	5126000			1906	5787000	5711000	3803000	5426000	5180000			1906	2926394	2988132	1901539	2568312	2596094			1906	2635000	2511000	1345000	2115000	2174000			1906	2680000	2581000	1388000	2153000	2248000			1906	4580980
1907	6272608	6260261	4136464	6062698	5683008			1907	5957000	5732000	3297000	5379000	5126000			1907	5955000	5741000	3444000	5426000	5180000			1907	2938742	2901699	1827453	2568312	2559052			1907	2679000	2423000	1323000	2115000	2131000			1907	2722000	2488000	1365000	2153000	2202000			1907	4580980
1908	6173827	6173827	4395765	6062698	5701529			1908	5762000	5710000	3677000	5379000	5169000			1908	5763000	5717000	3916000	5426000	5228000			1908	2926394	2926394	1481719	2568312	2475705			1908	2635000	2448000	1220000	2115000	2034000			1908	2680000	2515000	1257000	2153000	2099000			1908	4580980
1909	6198523	6136784	4247593	6062698	5661400			1909	5811000	5701000	3460000	5379000	5076000			1909	5811000	5707000	3646000	5426000	5124000			1909	2938742	3074566	1889191	2568312	2617703			1909	2679000	2599000	1341000	2115000	2199000			1909	2722000	2675000	1384000	2153000	2275000			1909	4580980
1910	6161480	6050351	4148812	6062698	5605835			1910	5738000	5679000	3315000	5379000	4948000			1910	5739000	5683000	3467000	5426000	4980000			1910	2914046	2889351	1938582	2617703	2589921			1910	2591000	2410000	1356000	2679000	2167000			1910	2639000	2474000	1400000	2697000	2240000			1910	4580980
1911	6223218	6161480	4358722	6062698	5701530			1911	5860000	5707000	3623000	5379000	5169000			1911	5859000	5714000	3848000	5426000	5228000			1911	3074566	3296824	1889191	2568312	2707223			1911	3163000	2825000	1341000	2115000	2302000			1911	3182000	2916000	1384000	2153000	2385000			1911	4580980
1912	6198523	6223218	4358722	6062698	5710790			1912	5811000	5722000	3623000	5379000	5191000			1912	5811000	5731000	3848000	5426000	5252000			1912	3037523	3333867	2074406	2568312	2753527			1912	3031000	2863000	1396000	2115000	2356000			1912	3057000	2956000	1442000	2153000	2442000			1912	4580980
1913	6186175	6124437	4506894	6062698	5720051			1913	5787000	5698000	3840000	5379000	5212000			1913	5787000	5704000	4118000	5426000	5276000			1913	2901699	3062218	2395445	2568312	2731919			1913	2547000	2586000	1492000	2115000	2331000			1913	2597000	2662000	1543000	2153000	2416000			1913	4580980
1914	6235565	6210870	4408113	6062698	5729312			1914	5884000	5719000	3695000	5379000	5234000			1914	5883000	5728000	3938000	5426000	5301000			1914	2963437	3062218	1950929	2568312	2636224			1914	2767000	2586000	1360000	2115000	2220000			1914	2806000	2662000	1404000	2153000	2297000			1914	4580980
1915	6223218	6161480	4420460	6062698	5716964			1915	5860000	5707000	3714000	5379000	5205000			1915	5859000	5714000	3961000	5426000	5268000			1915	2864656	3025175	2012668	2568312	2617703			1915	2415000	2548000	1378000	2115000	2199000			1915	2472000	2622000	1423000	2153000	2275000			1915	4580980
1916	6186175	6198523	4692109	6062698	5784876			1916	5787000	5716000	4112000	5379000	5362000			1916	5787000	5724000	4455000	5426000	5445000			1916	2926394	3148652	2309011	2593007	2744266			1916	2635000	2674000	1466000	2397000	2345000			1916	2680000	2755000	1516000	2425000	2431000			1916	4580980
1917	6198523	6223218	4519242	6062698	5750920			1917	5811000	5722000	3859000	5379000	5284000			1917	5811000	5731000	4140000	5426000	5357000			1917	3123957	3444996	2247273	2568312	2846135			1917	3338000	2976000	1448000	2115000	2463000			1917	3349000	3076000	1496000	2153000	2557000			1917	4580980
1918	6186175	6284956	4704456	6062698	5809571			1918	5787000	5738000	4130000	5379000	5419000			1918	5787000	5748000	4477000	5426000	5509000			1918	3012828	3370910	2234925	2568312	2796744			1918	2943000	2901000	1444000	2115000	2406000			1918	2973000	2996000	1492000	2153000	2496000			1918	4580980
1919	6198523	6247913	4618023	6062698	5781789			1919	5811000	5728000	4004000	5379000	5355000			1919	5811000	5738000	4320000	5426000	5437000			1919	2914046	3062218	1839801	2568312	2596094			1919	2591000	2586000	1326000	2115000	2174000			1919	2639000	2662000	1369000	2153000	2248000			1919	4580980
1920	6235565	6260261	4704456	6062698	5815745			1920	5884000	5732000	4130000	5379000	5434000			1920	5883000	5741000	4477000	5426000	5525000			1920	2889351	2815265	1790410	2568312	2515835			1920	2503000	2335000	1312000	2115000	2081000			1920	2555000	2394000	1354000	2153000	2149000			1920	4580980
1921	6173827	6235565	4420460	6062698	5723138			1921	5762000	5725000	3714000	5379000	5219000			1921	5763000	5735000	3961000	5426000	5284000			1921	2914046	2852308	1728672	2568312	2515835			1921	2591000	2372000	1293000	2115000	2081000			1921	2639000	2434000	1334000	2153000	2149000			1921	4580980
1922	6198523	6173827	4506894	6062698	5735486			1922	5811000	5710000	3840000	5379000	5248000			1922	5811000	5717000	4118000	5426000	5317000			1922	2951089	2901699	1481719	2568312	2475705			1922	2723000	2423000	1220000	2115000	2034000			1922	2764000	2488000	1257000	2153000	2099000			1922	4580980
1923	6161480	6112089	4420460	6062698	5689182			1923	5738000	5695000	3714000	5379000	5141000			1923	5739000	5700000	3961000	5426000	5196000			1923	2889351	2914046	1728672	2568312	2525095			1923	2503000	2435000	1293000	2115000	2092000			1923	2555000	2501000	1334000	2153000	2160000			1923	4580980
1924	6210870	6173827	4161160	6062698	5652139			1924	5835000	5710000	3333000	5379000	5055000			1924	5835000	5717000	3489000	5426000	5100000			1924	2889351	2765875	1494066	2518921	2417053			1924	2503000	2284000	1224000	1551000	1967000			1924	2555000	2341000	1261000	1610000	2027000			1924	4580980
1925	6186175	6173827	4346374	6062698	5692269			1925	5787000	5710000	3605000	5379000	5148000			1925	5787000	5717000	3826000	5426000	5204000			1925	2864656	2469531	1469371	2555964	2339881			1925	2415000	1982000	1216000	1974000	1877000			1925	2472000	2020000	1253000	2018000	1932000			1925	4580980
1926	6186175	6124437	4408113	6062698	5695356			1926	5787000	5698000	3695000	5379000	5155000			1926	5787000	5704000	3938000	5426000	5212000			1926	2889351	2790570	1889191	2568312	2534356			1926	2503000	2309000	1341000	2115000	2102000			1926	2555000	2367000	1384000	2153000	2172000			1926	4580980
1927	6161480	6099741	4309331	6062698	5658313			1927	5738000	5691000	3550000	5379000	5069000			1927	5739000	5697000	3759000	5426000	5116000			1927	2889351	2938742	1926234	2568312	2580660			1927	2503000	2460000	1352000	2115000	2156000			1927	2555000	2528000	1396000	2153000	2229000			1927	4580980
1928	6161480	6075046	4395765	6062698	5673747			1928	5738000	5685000	3677000	5379000	5105000			1928	5739000	5690000	3916000	5426000	5156000			1928	2889351	3037523	1728672	2568312	2555965			1928	2503000	2561000	1293000	2115000	2127000			1928	2555000	2635000	1334000	2153000	2198000			1928	4580980
1929	6186175	6087394	4334027	6062698	5667574			1929	5787000	5688000	3587000	5379000	5091000			1929	5787000	5693000	3803000	5426000	5140000			1929	2963437	3173347	1815105	2518921	2617703			1929	2767000	2699000	1319000	1551000	2199000			1929	2806000	2782000	1361000	1610000	2275000			1929	4580980
1930	6161480	6050351	4506894	6062698	5695356			1930	5738000	5679000	3840000	5379000	5155000			1930	5739000	5683000	4118000	5426000	5212000			1930	2864656	2802918	1370590	2543617	2395445			1930	2415000	2322000	1187000	1833000	1942000			1930	2472000	2381000	1222000	1882000	2000000			1930	4580980
1931	6161480	6050351	4358722	6062698	5658313			1931	5738000	5679000	3623000	5379000	5069000			1931	5739000	5683000	3848000	5426000	5116000			1931	2877003	2580660	1469371	2568312	2373837			1931	2459000	2096000	1216000	2115000	1917000			1931	2513000	2140000	1253000	2153000	1974000			1931	4580980
1932	6161480	6112089	4432808	6062698	5692269			1932	5738000	5695000	3732000	5379000	5148000			1932	5739000	5700000	3983000	5426000	5204000			1932	2889351	2938742	1543457	2531269	2475705			1932	2503000	2460000	1238000	1692000	2034000			1932	2555000	2528000	1276000	1746000	2099000			1932	4580980
1933	6173827	6136784	4543937	6062698	5729312			1933	5762000	5701000	3895000	5379000	5234000			1933	5763000	5707000	4185000	5426000	5301000			1933	2864656	2543617	1481719	2568312	2364576			1933	2415000	2058000	1220000	2115000	1906000			1933	2472000	2100000	1257000	2153000	1962000			1933	4580980
1934	6235565	6173827	4667413	6062698	5784876			1934	5884000	5710000	4076000	5379000	5362000			1934	5883000	5717000	4410000	5426000	5445000			1934	3173347	3210390	2309011	2593007	2821439			1934	3514000	2737000	1466000	2397000	2434000			1934	3516000	2822000	1516000	2425000	2526000			1934	4580980
1935	6272608	6235565	4358722	6062698	5732398			1935	5957000	5725000	3623000	5379000	5241000			1935	5955000	5735000	3848000	5426000	5309000			1935	2963437	2938742	1839801	2531269	2568312			1935	2767000	2460000	1326000	1692000	2142000			1935	2806000	2528000	1369000	1746000	2214000			1935	4580980
1936	6272608	6223218	4296984	6062698	5713877			1936	5957000	5722000	3532000	5379000	5198000			1936	5955000	5731000	3736000	5426000	5260000			1936	2877003	2926394	1358242	2568312	2432488			1936	2459000	2448000	1183000	2115000	1984000			1936	2513000	2515000	1218000	2153000	2046000			1936	4580980
1937	6235565	6198523	4519242	6062698	5754007			1937	5884000	5716000	3859000	5379000	5291000			1937	5883000	5724000	4140000	5426000	5365000			1937	2901699	2815265	1728672	2568312	2503487			1937	2547000	2335000	1293000	2115000	2067000			1937	2597000	2394000	1334000	2153000	2134000			1937	4580980
1938	6223218	6210870	4358722	6062698	5713877			1938	5860000	5719000	3623000	5379000	5198000			1938	5859000	5728000	3848000	5426000	5260000			1938	2938742	2914046	1469371	2518921	2460270			1938	2679000	2435000	1216000	1551000	2017000			1938	2722000	2501000	1253000	1610000	2080000			1938	4580980
1939	6247913	6247913	4383417	6062698	5735485			1939	5908000	5728000	3659000	5379000	5248000			1939	5907000	5738000	3893000	5426000	5317000			1939	2889351	2728832	1642238	2568312	2457183			1939	2503000	2247000	1268000	2115000	2013000			1939	2555000	2301000	1307000	2153000	2076000			1939	4580980
1940	6186175	6124437	3778382	6062698	5537923			1940								1940								1940	2901699	2617703	1444676	2568312	2383098			1940								1940								1940	4580980
1941	6186175	6124437	3778382	6062698	5537923			1941								1941								1941	2901699	2617703	1444676	2568312	2383098			1941								1941								1941	4580980
1942	6186175	6124437	3778382	6062698	5537923			1942								1942								1942	2901699	2617703	1444676	2568312	2383098			1942								1942								1942	4580980
1943	6186175	6124437	3778382	6062698	5537923			1943								1943								1943	2901699	2617703	1444676	2568312	2383098			1943								1943								1943	4580980
1944	6186175	6124437	3778382	6062698	5537923			1944								1944								1944	2901699	2617703	1444676	2568312	2383098			1944								1944								1944	4580980
1945	6186175	6124437	3778382	6062698	5537923			1945								1945								1945	2901699	2617703	1444676	2568312	2383098			1945								1945								1945	4580980
1946	6173827	6186175	4753847	6062698	5794137			1946	5785000	5700000	4003000	5305000	5221000			1946	5776000	5702000	4104000	5307000	5227000			1946	2889351	3037523	1506414	2568312	2500400			1946	2570000	2401000	1239000	1984000	1993000			1946	2592000	2422000	1270000	1997000	2015000			1946	4580980
1947	6161480	6025655	4593327	6062698	5710790			1947	5770000	5680000	3620000	5305000	5035000			1947	5761000	5682000	3692000	5307000	5030000			1947	2877003	2877003	1629890	2568312	2488052			1947	2529000	2140000	1279000	1984000	1978000			1947	2548000	2161000	1305000	1997000	2000000			1947	4580980
1948	6186175	6186175	4445156	6062698	5720051			1948	5800000	5700000	3265000	5305000	5056000			1948	5792000	5702000	3311000	5307000	5052000			1948	2914046	3099261	1790410	2555964	2589920			1948	2651000	2501000	1330000	1646000	2098000			1948	2680000	2522000	1351000	1684000	2123000			1948	4580980
1949	6223218	6247913	4642718	6062698	5794137			1949	5845000	5708000	3738000	5305000	5221000			1949	5839000	5710000	3819000	5307000	5227000			1949	2914046	3210390	2062058	2568312	2688702			1949	2651000	2681000	1416000	1984000	2214000			1949	2680000	2702000	1429000	1997000	2243000			1949	4580980
1950	6186175	6223218	4741499	6062698	5803398			1950	5800000	5705000	3974000	5305000	5242000			1950	5792000	5707000	4072000	5307000	5249000			1950	2926394	3062218	2049711	2568312	2651659			1950	2692000	2441000	1412000	1984000	2170000			1950	2724000	2462000	1425000	1997000	2198000			1950	4580980
1951	6186175	6260261	4469851	6062698	5744746			1951	5800000	5710000	3324000	5305000	5111000			1951	5792000	5712000	3375000	5307000	5110000			1951	2864656	3111609	2012668	2568312	2639311			1951	2489000	2521000	1401000	1984000	2156000			1951	2504000	2542000	1415000	1997000	2183000			1951	4580980
1952	6223218	6223218	4618023	6075046	5784876			1952	5845000	5705000	3679000	5734000	5200000			1952	5839000	5707000	3755000	5744000	5205000			1952	3012828	3099261	1950929	2568312	2657833			1952	2976000	2501000	1381000	1984000	2178000			1952	3033000	2522000	1397000	1997000	2206000			1952	4580980
1953	6161480	6062698	4087074	5963917	5568792			1953	5785000	5691000	3551000	5367000	5117000			1953	5775000	5690000	3589000	5364000	5110000			1953	3161000	3012828	1839801	2333707	2586834			1953	2695000	2583000	1382000	1919000	2145000			1953	2713000	2603000	1385000	1936000	2161000			1953	4580980
1954	6149132	6124437	3914206	5976265	5541010			1954	5774000	5705000	3377000	5388000	5084000			1954	5765000	5705000	3396000	5386000	5076000			1954	3049871	3136304	1691629	2358402	2559052			1954	2565000	2693000	1317000	1935000	2118000			1954	2583000	2705000	1326000	1950000	2135000			1954	4580980
1955	6161480	6186175	3963597	5877483	5547184			1955	5785000	5720000	3427000	5216000	5091000			1955	5775000	5721000	3451000	5211000	5083000			1955	3111609	3198042	1679281	2321359	2577573			1955	2638000	2748000	1312000	1911000	2136000			1955	2656000	2756000	1321000	1929000	2153000			1955	4580980
1956	6136784	6038003	4185855	6075046	5608922			1956	5763000	5685000	3650000	5561000	5164000			1956	5754000	5683000	3700000	5560000	5160000			1956	3062218	3025175	1741019	2346054	2543617			1956	2580000	2594000	1339000	1927000	2103000			1956	2598000	2613000	1346000	1943000	2121000			1956	4580980
1957	6235565	6050351	4259941	6013308	5639791			1957	5850000	5688000	3725000	5453000	5200000			1957	5838000	5687000	3782000	5451000	5199000			1957	2877003	2901699	1568152	2642398	2497313			1957	2363000	2484000	1263000	2119000	2059000			1957	2381000	2511000	1277000	2110000	2078000			1957	4580980
1958	6210870	6136784	3753687	6013308	5528662			1958	5829000	5708000	3216000	5453000	5069000			1958	5817000	5709000	3216000	5451000	5060000			1958	3025175	2765875	1691629	2518921	2500400			1958	2536000	2363000	1317000	2039000	2062000			1958	2554000	2398000	1326000	2041000	2081000			1958	4580980
1959	6161480	6173827	4210550	6050351	5649052			1959	5785000	5717000	3675000	5518000	5211000			1959	5775000	5718000	3727000	5517000	5210000			1959	3136304	3000480	1815105	2444836	2599181			1959	2666000	2572000	1371000	1991000	2157000			1959	2684000	2592000	1375000	1999000	2173000			1959	4580980
1960	6124437	6099741	3901859	5889831	5503967			1960	5752000	5699000	3365000	5238000	5040000			1960	5744000	5699000	3382000	5233000	5030000			1960	2852308	2716484	1469371	2432488	2367663			1960	2334000	2319000	1219000	1983000	1934000			1960	2352000	2357000	1237000	1992000	1958000			1960	4580980
1961	6124437	6025655	3889511	5951569	5497793			1961	5752000	5682000	3352000	5345000	5033000			1961	5744000	5680000	3368000	5342000	5022000			1961	3123957	3099261	1827453	2284316	2583747			1961	2652000	2660000	1377000	1887000	2142000			1961	2670000	2674000	1380000	1909000	2158000			1961	4580980
1962	6186175	6062698	4074726	5902179	5556445			1962	5807000	5691000	3538000	5259000	5102000			1962	5796000	5690000	3575000	5255000	5095000			1962	2963437	3000480	1938582	2728832	2657833			1962	2464000	2572000	1426000	2175000	2213000			1962	2482000	2592000	1424000	2159000	2227000			1962	4580980
1963	6050351	6099741	4469851	6038003	5664487			1963	5686000	5699000	3935000	5496000	5230000			1963	5681000	5699000	4017000	5495000	5229000			1963	3370910	2988132	2025015	2457183	2710310			1963	2941000	2561000	1463000	1999000	2263000			1963	2959000	2582000	1459000	2006000	2276000			1963	4580980
1964	6198523	6136784	4395765	5926874	5664487			1964	5818000	5708000	3861000	5302000	5230000			1964	5807000	5709000	3934000	5298000	5229000			1964	3111609	2790570	1716324	2580660	2549791			1964	2638000	2385000	1328000	2079000	2109000			1964	2656000	2419000	1336000	2076000	2127000			1964	4580980
1965	6099741	6038003	4247593	5976265	5590401			1965	5730000	5685000	3712000	5388000	5142000			1965	5723000	5683000	3769000	5386000	5137000			1965	3247433	2938742	2086754	2667093	2735006			1965	2797000	2517000	1491000	2135000	2287000			1965	2815000	2541000	1483000	2124000	2299000			1965	4580980
1966	6149132	6062698	3877163	6087394	5544097			1966	5774000	5691000	3340000	5582000	5088000			1966	5765000	5690000	3354000	5582000	5080000			1966	3556124	3136304	1938582	2679441	2827613			1966	3158000	2693000	1426000	2143000	2376000			1966	3176000	2705000	1424000	2131000	2385000			1966	4580980
1967	6223218	6272608	4358722	6062698	5729312			1967	5840000	5741000	3824000	5539000	5306000			1967	5828000	5743000	3893000	5538000	5310000			1967	3210390	2778222	1963277	3000480	2738092			1967	2753000	2374000	1436000	2351000	2290000			1967	2771000	2408000	1434000	2312000	2301000			1967	4580980
1968	6247913	6173827	3815425	6013308	5562618			1968	5861000	5717000	3278000	5453000	5109000			1968	5849000	5718000	3285000	5451000	5103000			1968	3519082	3370910	2197882	3272128	3090001			1968	3114000	2902000	1539000	2528000	2628000			1968	3132000	2899000	1528000	2465000	2628000			1968	4580980
1969	6198523	6198523	4445156	6099741	5735486			1969	5818000	5723000	3911000	5604000	5313000			1969	5807000	5724000	3990000	5604000	5318000			1969	3728992	3543777	2185535	2753527	3052958			1969	3360000	3056000	1534000	2191000	2593000			1969	3378000	3043000	1523000	2173000	2594000			1969	4580980
1970	6235565	6149132	4358722	6038003	5695356			1970	5850000	5711000	3824000	5496000	5266000			1970	5838000	5712000	3893000	5495000	5268000			1970	3346214	2815265	1716324	2667093	2636224			1970	2912000	2407000	1328000	2135000	2192000			1970	2930000	2439000	1336000	2124000	2207000			1970	4580980
1971	6235565	6161480	4235245	6260261	5723138			1971	5850000	5714000	3700000	5884000	5299000			1971	5838000	5715000	3755000	5887000	5302000			1971	3235085	3000480	1778062	2889351	2725745			1971	2782000	2572000	1355000	2279000	2278000			1971	2800000	2592000	1360000	2250000	2290000			1971	4580980
1972	6321999	6161480	4778542	6173827	5858962			1972	5873000	5712000	3789000	5847000	5450000			1972	5859000	5714000	3854000	5852000	5450000			1972	3037523	2901699	1345894	2284316	2392358			1972	2801000	2738000	1263000	1848000	2143000			1972	2792000	2735000	1259000	1844000	2132000			1972	4580980
1973	6223218	6149132	3963597	5963917	5574966			1973	5794000	5707000	3593000	5388000	5170000			1973	5785000	5709000	3622000	5383000	5166000			1973	2901699	2580660	1580500	2790570	2463357			1973	2622000	2429000	1425000	2359000	2237000			1973	2617000	2421000	1418000	2324000	2228000			1973	4580980
1974	6186175	6149132	3728992	6062698	5531749			1974	5765000	5707000	3536000	5604000	5128000			1974	5758000	5709000	3556000	5604000	5123000			1974	2630050	2630050	1531109	2370750	2290490			1974	2265000	2476000	1391000	1935000	2009000			1974	2266000	2470000	1385000	1926000	1995000			1974	4580980
1975	6260261	6099741	3580820	6075046	5503967			1975	5823000	5686000	3500000	5631000	5100000			1975	5813000	5687000	3514000	5631000	5095000			1975	2864656	2506574	1642238	2667093	2420140			1975	2573000	2357000	1467000	2234000	2180000			1975	2569000	2349000	1460000	2207000	2170000			1975	4580980
1976	6346694	6136784	3889511	5926874	5574966			1976	5892000	5702000	3575000	5307000	5170000			1976	5878000	5703000	3601000	5301000	5166000			1976	2802918	2568312	1531109	2494226	2349141			1976	2492000	2417000	1391000	2060000	2086000			1976	2489000	2409000	1385000	2043000	2074000			1976	4580980
1977	6087394	6062698	3679601	6000960	5457663			1977	5686000	5671000	3524000	5469000	5055000			1977	5684000	5670000	3542000	5466000	5049000			1977	3222738	3025175	1543457	2531269	2580660			1977	3044000	2857000	1399000	2097000	2391000			1977	3031000	2856000	1393000	2078000	2386000			1977	4580980
1978	6198523	6149132	4012988	5951569	5578053			1978	5774000	5707000	3605000	5361000	5173000			1978	5767000	5709000	3636000	5356000	5169000			1978	3025175	3000480	1691629	2827613	2636224			1978	2784000	2833000	1501000	2396000	2464000			1978	2776000	2832000	1494000	2359000	2461000			1978	4580980
1979	6112089	6050351	3383257	5976265	5380491			1979	5723000	5686000	3548000	5335000	5055000			1979	5726000	5686000	3534000	5331000	5051000			1979	3420300	3000480	1197722	2222578	2460270			1979	2953000	2781000	1266000	1981000	2274000			1979	2951000	2776000	1260000	1967000	2273000			1979	4580980
1980	6087394	6062698	3370910	6013308	5383578			1980	5711000	5689000	3536000	5394000	5058000			1980	5715000	5689000	3523000	5390000	5054000			1980	3012828	2481879	1407633	2617703	2380011			1980	2692000	2444000	1400000	2273000	2214000			1980	2690000	2439000	1393000	2238000	2212000			1980	4580980
1981	6149132	6038003	3259781	6050351	5374317			1981	5741000	5682000	3429000	5452000	5049000			1981	5742000	5682000	3417000	5450000	5045000			1981	3086914	3062218	1469371	2691789	2577573			1981	2739000	2822000	1439000	2328000	2361000			1981	2737000	2817000	1432000	2289000	2362000			1981	4580980
1982	6247913	6161480	3444996	6161480	5503967			1982	5790000	5714000	3607000	5629000	5181000			1982	5786000	5714000	3593000	5628000	5172000			1982	3370910	2839961	1580500	2321359	2528183			1982	2922000	2677000	1510000	2054000	2324000			1982	2920000	2672000	1502000	2035000	2324000			1982	4580980
1983	6359042	6149132	3926554	6136784	5642878			1983	5844000	5711000	4070000	5589000	5322000			1983	5835000	5711000	4050000	5589000	5309000			1983	2778222	2518921	1247113	2407793	2238012			1983	2541000	2468000	1297000	2118000	2108000			1983	2539000	2463000	1291000	2094000	2104000			1983	4580980
1984	6321999	6210870	3543777	6124437	5550271			1984	5826000	5726000	3702000	5570000	5228000			1984	5818000	5726000	3687000	5569000	5218000			1984	2568312	2296664	1135984	2025015	2006494			1984	2406000	2323000	1226000	1835000	1936000			1984	2404000	2318000	1221000	1831000	1929000			1984	4580980
1985	6173827	6087394	3469691	5865136	5399012			1985	5754000	5695000	3631000	5159000	5074000			1985	5753000	5695000	3616000	5152000	5069000			1985	2778222	2704136	1123637	2370750	2244186			1985	2541000	2589000	1218000	2090000	2113000			1985	2539000	2584000	1213000	2069000	2109000			1985	4580980
1986	6112089	6075046	3556124	6087394	5457663			1986	5723000	5692000	3714000	5511000	5134000			1986	5726000	5692000	3698000	5509000	5127000			1986	2988132	2802918	1370590	2346054	2376924			1986	2676000	2653000	1376000	2072000	2212000			1986	2674000	2648000	1370000	2052000	2210000			1986	4580980
1987	6198523	6161480	3309171	6087394	5439142			1987	5766000	5714000	3476000	5511000	5115000			1987	5764000	5714000	3464000	5509000	5108000			1987	3210390	2741179	1506414	2654746	2528182			1987	2819000	2613000	1463000	2301000	2324000			1987	2817000	2608000	1455000	2264000	2324000			1987	4580980
1988	6161480	6062698	3543777	5988612	5439142			1988	5747000	5689000	3702000	5354000	5115000			1988	5748000	5689000	3687000	5351000	5108000			1988	3086914	2778222	1568152	2815265	2562138			1988	2739000	2637000	1502000	2419000	2349000			1988	2737000	2632000	1494000	2374000	2350000			1988	4580980
1989	6247913	6075046	3519082	6075046	5479272			1989	5790000	5692000	3678000	5492000	5156000			1989	5786000	5692000	3663000	5490000	5148000			1989	3123957	2481879	1605195	2370750	2395445			1989	2763000	2444000	1526000	2090000	2225000			1989	2761000	2439000	1518000	2069000	2224000			1989	4580980
1990	6260261	6161480	3346214	6124437	5473098			1990	5796000	5714000	3512000	5570000	5149000			1990	5791000	5714000	3499000	5569000	5142000			1990	2691789	2185535	1185375	2111449	2043537			1990	2486000	2251000	1258000	1899000	1964000			1990	2484000	2246000	1252000	1891000	1957000			1990	4580980
1991	6272608	6112089	3593167	6013308	5497793			1991	5802000	5701000	3750000	5394000	5175000			1991	5796000	5701000	3734000	5390000	5166000			1991	2691789	2333707	1247113	2074406	2086754			1991	2486000	2347000	1297000	1871000	1996000			1991	2484000	2342000	1291000	1865000	1990000			1991	4580980
1992	6223218	6124437	3864816	6136784	5587314			1992	5778000	5704000	4011000	5589000	5266000			1992	5775000	5704000	3992000	5589000	5254000			1992	2617703	2037363	1370590	2173187	2049711			1992	2438000	2155000	1376000	1944000	1968000			1992	2436000	2150000	1370000	1933000	1962000			1992	4580980
1993	6359042	6210870	3161000	6112089	5460750			1993	5844000	5726000	3334000	5550000	5137000			1993	5835000	5726000	3323000	5549000	5130000			1993	2518921	2370750	1469371	2210230	2142318			1993	2375000	2372000	1439000	1972000	2037000			1993	2373000	2367000	1432000	1958000	2032000			1993	4580980
1994	6198523	6025655	3333867	6000960	5389751			1994	5766000	5679000	3500000	5374000	5065000			1994	5764000	5679000	3487000	5370000	5060000			1994	2728832	2432488	1247113	2197882	2151579			1994	2509000	2412000	1297000	1963000	2044000			1994	2507000	2407000	1291000	1950000	2039000			1994	4580980
1995	6247913	5963917	3235085	5988612	5358882			1995	5790000	5664000	3405000	5354000	5033000			1995	5786000	5664000	3393000	5351000	5029000			1995	2494226	2111449	1284156	2494226	2096014			1995	2359000	2203000	1321000	2182000	2003000			1995	2357000	2198000	1315000	2154000	1997000			1995	4580980
1996	6136784	6000960	3506734	5939222	5395925			1996	5735000	5673000	3666000	5276000	5071000			1996	5737000	5673000	3652000	5271000	5066000			1996	2778222	2568312	1197722	2210230	2188622			1996	2541000	2500000	1266000	1972000	2071000			1996	2539000	2495000	1260000	1958000	2067000			1996	4580980
1997	6161480	6013308	3123957	5939222	5309492			1997	5747000	5676000	3298000	5276000	4983000			1997	5748000	5676000	3288000	5271000	4981000			1997	3074566	2704136	1395285	2444836	2404706			1997	2731000	2589000	1392000	2145000	2232000			1997	2729000	2584000	1385000	2120000	2231000			1997	4580980
1998	6161480	5976265	2667093	5914526	5179841			1998	5747000	5667000	2859000	5237000	4851000			1998	5748000	5667000	2854000	5232000	4854000			1998	3148652	2790570	1432328	2284316	2413967			1998	2779000	2645000	1415000	2027000	2239000			1998	2777000	2640000	1409000	2009000	2238000			1998	4580980
1999	6161480	6038003	3284476	5951569	5358882			1999	5747000	5682000	3453000	5296000	5033000			1999	5748000	5682000	3440000	5291000	5029000			1999	2630050	2543617	1234765	1889191	2074406			1999	2446000	2484000	1289000	1734000	1986000			1999	2444000	2479000	1284000	1738000	1980000			1999	4580980
2000	6136784	6000960	3235085	5889831	5315665			2000	5735000	5673000	3405000	5198000	4989000			2000	5737000	5673000	3393000	5192000	4987000			2000	2481879	2222578	1247113	2012668	1991060			2000	2351000	2275000	1297000	1826000	1924000			2000	2349000	2270000	1291000	1823000	1917000			2000	4580980
2001	6124437	6025655	3247433	5519402	5229232			2001	5729000	5679000	3417000	4610000	4901000			2001	5731000	5679000	3405000	4597000	4902000			2001	2790570	2383097	1024855	2037363	2058971			2001	2549000	2380000	1155000	1844000	1975000			2001	2547000	2375000	1151000	1840000	1969000			2001	4580980
2002	6124437	6025655	3099261	5902179	5287883			2002	5729000	5679000	3275000	5217000	4961000			2002	5731000	5679000	3264000	5212000	4960000			2002	2704136	2296664	1111289	2123797	2058972			2002	2494000	2323000	1211000	1908000	1975000			2002	2492000	2318000	1206000	1899000	1969000			2002	4580980
2003	6112089	6000960	3012828	5754007	5219971			2003	5723000	5673000	3192000	4982000	4892000			2003	5726000	5673000	3182000	4974000	4893000			2003	2790570	2383097	1284156	2148492	2151579			2003	2549000	2380000	1321000	1926000	2044000			2003	2547000	2375000	1315000	1916000	2039000			2003	4580980
2004	6050351	5963917	3086914	5926874	5257014			2004	5693000	5664000	3263000	5257000	4930000			2004	5699000	5664000	3253000	5251000	4929000			2004	2753527	2160840	901379	1938582	1938582			2004	2525000	2235000	1077000	1771000	1885000			2004	2523000	2230000	1073000	1772000	1877000			2004	4580980
2005	6050351	5951569	3123957	5828093	5238493			2005	5693000	5661000	3298000	5100000	4911000			2005	5699000	5661000	3288000	5093000	4911000			2005	2481879	2333707	1185375	1889191	1972538			2005	2351000	2347000	1258000	1734000	1911000			2005	2349000	2342000	1252000	1738000	1903000			2005	4580980
Walsh dataset (pre-calibration)								T-based proxy (unadj)								T-based proxy (MW09-adj)								Walsh dataset (pre-calibration)								T-based proxy (unadj)								T-based proxy (MW09-adj)								Walsh dataset (pre-calibration)
North American, sea ice extent (million km2)								N. American, sea ice extent (million km2)								N. American, sea ice extent (million km2)								Nordic, sea ice extent (million km2)								Nordic, sea ice extent (million km2)								Nordic, sea ice extent (million km2)								Siberian, sea ice extent (million km2)
Means	Winter	Spring	Summer	Autumn	Annual			Means	Winter	Spring	Summer	Autumn	Annual			Means	Winter	Spring	Summer	Autumn	Annual			Means	Winter	Spring	Summer	Autumn	Annual			Means	Winter	Spring	Summer	Autumn	Annual			Means	Winter	Spring	Summer	Autumn	Annual			Means	Winter
1901-1939	6197000	6158000	4386000	6063000	5701000			1901-1939	5808000	5706000	3663000	5406000	5168000			1901-1939	5808000	5713000	3898000	5454000	5227000			1901-1939	2936000	2960000	1808000	2565000	2567000			1901-1939	2669000	2482000	1317000	2077000	2140000			1901-1939	2713000	2551000	1359000	2117000	2212000			1901-1939	4581000
1940-1945	6186000	6124000	3778000	6063000	5538000			1940-1945	5715000	5693000	3586000	5320000	5024000			1940-1945	5710000	5694000	3668000	5324000	5022000			1940-1945	2902000	2618000	1445000	2568000	2383000			1940-1945	2688000	2552000	1308000	1979000	2135000			1940-1945	2723000	2571000	1324000	1988000	2155000			1940-1945	4581000
1946-1952	6191000	6193000	4609000	6064000	5765000			1946-1952	5806000	5701000	3657000	5350000	5156000			1946-1952	5798000	5703000	3732000	5353000	5158000			1946-1952	2914000	3071000	1857000	2567000	2602000			1946-1952	2651000	2455000	1351000	1948000	2112000			1946-1952	2680000	2476000	1370000	1964000	2138000			1946-1952	4581000
1953-1971	6173000	6119000	4129000	6011000	5608000			1953-1971	5795000	5704000	3593000	5449000	5163000			1953-1971	5785000	5704000	3636000	5447000	5159000			1953-1971	3194000	3012000	1835000	2599000	2660000			1953-1971	2734000	2582000	1380000	2091000	2215000			1953-1971	2752000	2602000	1383000	2086000	2229000			1953-1971	4581000
1972-1978	6232000	6130000	3948000	6022000	5583000			1972-1978	5801000	5699000	3589000	5515000	5178000			1972-1978	5792000	5700000	3618000	5513000	5174000			1972-1978	2926000	2745000	1552000	2567000	2447000			1972-1978	2654000	2587000	1405000	2133000	2215000			1972-1978	2648000	2582000	1399000	2112000	2206000			1972-1978	4581000
1979-2005	6183000	6064000	3343000	5982000	5393000			1979-2005	5758000	5689000	3509000	5344000	5068000			1979-2005	5757000	5689000	3496000	5340000	5063000			1979-2005	2845000	2502000	1297000	2262000	2227000			1979-2005	2584000	2457000	1329000	2010000	2100000			1979-2005	2582000	2452000	1323000	1994000	2096000			1979-2005	4581000
Std. Dev.	Winter	Spring	Summer	Autumn	Annual			Std. Dev.	Winter	Spring	Summer	Autumn	Annual			Std. Dev.	Winter	Spring	Summer	Autumn	Annual			Std. Dev.	Winter	Spring	Summer	Autumn	Annual			Std. Dev.	Winter	Spring	Summer	Autumn	Annual			Std. Dev.	Winter	Spring	Summer	Autumn	Annual			Std. Dev.	Winter
1901-1939	34000	72000	171000	3000	57000			1901-1939	67000	18000	251000	268000	132000			1901-1939	66000	20000	311000	279000	148000			1901-1939	73000	216000	272000	19000	128000			1901-1939	260000	220000	81000	217000	148000			1901-1939	247000	234000	85000	209000	158000			1901-1939	0
1940-1945	0	0	0	0	0			1940-1945	20000	21000	169000	187000	70000			1940-1945	19000	22000	191000	189000	74000			1940-1945	0	0	0	0	0			1940-1945	298000	157000	50000	215000	171000			1940-1945	335000	198000	47000	214000	211000			1940-1945	0
1946-1952	23000	79000	120000	5000	39000			1946-1952	28000	10000	287000	174000	87000			1946-1952	29000	10000	308000	177000	92000			1946-1952	49000	101000	220000	5000	80000			1946-1952	161000	164000	70000	137000	94000			1946-1952	175000	164000	63000	127000	97000			1946-1952	0
1953-1971	53000	67000	228000	90000	78000			1953-1971	47000	16000	229000	157000	92000			1953-1971	45000	17000	255000	159000	97000			1953-1971	229000	210000	198000	259000	180000			1953-1971	268000	187000	87000	168000	173000			1953-1971	268000	174000	79000	146000	167000			1953-1971	0
1972-1978	88000	36000	398000	87000	130000			1972-1978	70000	15000	96000	190000	128000			1972-1978	66000	16000	113000	194000	130000			1972-1978	190000	222000	109000	205000	124000			1972-1978	250000	214000	75000	207000	163000			1972-1978	245000	217000	74000	194000	167000			1972-1978	0
1979-2005	84000	75000	260000	140000	115000			1979-2005	41000	19000	250000	222000	117000			1979-2005	37000	19000	247000	225000	113000			1979-2005	271000	272000	174000	246000	203000			1979-2005	174000	177000	111000	182000	151000			1979-2005	174000	177000	110000	169000	154000			1979-2005	0
[truncated: 34 more columns]

## Sheet: 09 - AARI - original
Interpolated data																	Original data						Interpolation calculations - winter											Interpolation calculations - spring											Interpolation calculations - summer
	Extent	Extent	Extent	Extent	Extent	Extent																		Extrapol.	Extrapol.	Extrapol.	Extrapol.	Extent	Extent	Extent	Extent	Extent			Extrapol.	Extrapol.	Extrapol.	Extrapol.	Extent	Extent	Extent	Extent	Extent			Extrapol.	Extrapol.	Extrapol.	Extrapol.
	4 seas	4 seas	4 seas	4 seas	Frolov	4 seas		Siberian - rescaled (unadj)										Barents Sea	Barents Sea	Barents Sea	Barents Sea			Kara Sea	Laptev Sea	East Siberian Sea	Western Chukchi Sea	Kara Sea	Laptev Sea	East Siberian Sea	Western Chukchi Sea	4 seas			Kara Sea	Laptev Sea	East Siberian Sea	Western Chukchi Sea	Kara Sea	Laptev Sea	East Siberian Sea	Western Chukchi Sea	4 seas			Kara Sea	Laptev Sea	East Siberian Sea	Western Chukchi Sea
	Winter	Spring	Summer	Autumn	August	Annual		Year	Winter	Spring	Summer	Autumn	Frolov	Annual				Winter	Spring	Summer	Autumn			Winter	Winter	Winter	Winter	Winter	Winter	Winter	Winter	Winter			Spring	Spring	Spring	Spring	Spring	Spring	Spring	Spring	Spring			Summer	Summer	Summer	Summer
1900					3382160			1900					3322000				1933	NaN	NaN	NaN	NaN		1933											1933											1933	3790000
1901					3515800			1901					3548000				1934	NaN	NaN	NaN	NaN		1934											1934											1934	3970000
1902					3466910			1902					3466000				1935	NaN	NaN	NaN	NaN		1935											1935											1935	3550000		3980000
1903					3517520			1903					3551000				1936	NaN	0.8	0.32	NaN		1936											1936											1936	3790000		3940000	4120000
1904					3574720			1904					3648000				1937	NaN	1.57	0.46	NaN		1937											1937											1937	3850000	3640000	3820000	4120000
1905					3463720			1905					3460000				1938	0.54	NaN	NaN	NaN		1938											1938											1938	4080000	3350000	3860000	4010000
1906					3697720			1906					3856000				1939	NaN	0.82	NaN	NaN		1939											1939											1939	3740000	3840000	3780000	3790000
1907					3416360			1907					3380000				1940	NaN	0.73	NaN	NaN		1940				4120000				0.48	4120000		1940	4120000	4.06e+06	3980000	4010000	1.06	1.22	1.4	0.46	4.14e+06		1940	3150000	3500000	3900000
1908					3280530			1908					3151000				1941	0.76	0.93	NaN	NaN		1941	4120000	4.06e+06	4.02e+06	4120000	1.06	1.22	1.41	0.48	4170000		1941	3910000	3990000	3980000	4.07e+06	0.96	1.19	1.4	0.47	4.02e+06		1941	2600000	3770000	3860000	3450000
1909					3547690			1909					3602000				1942	NaN	NaN	NaN	NaN		1942	4.14e+06				1.07				4140000		1942	4.14e+06	4.06e+06	4.02e+06	4120000	1.07	1.22	1.41	0.48	4.18e+06		1942	3410000	3500000	3940000	3790000
1910					3487330			1910					3500000				1943	NaN	NaN	NaN	NaN		1943	4.14e+06				1.07				4140000		1943	4.1e+06	3960000	3980000	3790000	1.05	1.18	1.4	0.42	4050000		1943	3360000	2840000	3240000	3110000
1911					3331200			1911					3236000				1944	NaN	NaN	NaN	NaN		1944	3660000				0.84				3660000		1944	4.14e+06				1.07				4140000		1944	3470000	3820000	3710000	3730000
1912					4006120			1912					4377000				1945	NaN	NaN	NaN	NaN		1945	3970000	4.06e+06	4.02e+06	4120000	0.99	1.22	1.41	0.48	4.1e+06		1945	4000000	4040000	3980000	4.07e+06	1	1.21	1.4	0.47	4080000		1945	3380000	2810000	3740000	3680000
1913					3399520			1913					3352000				1946	NaN	0.74	0.65	NaN		1946	4.14e+06	4.06e+06	3980000	4120000	1.07	1.22	1.4	0.48	4170000		1946	4.02e+06	3890000	3940000	4120000	1.01	1.15	1.39	0.48	4.03e+06		1946	3430000	3670000	3860000	3730000
1914					3672120			1914					3812000				1947	NaN	0.61	0.43	NaN		1947	4.14e+06	4.06e+06	4.02e+06	4120000	1.07	1.22	1.41	0.48	4.18e+06		1947	3660000	3790000	3980000	4010000	0.84	1.11	1.4	0.46	3810000		1947	3260000	3400000	3740000	3510000
1915					3127580			1915					2892000				1948	0.85	0.83	0.51	NaN		1948	4.14e+06	4.06e+06	4.02e+06	4120000	1.07	1.22	1.41	0.48	4.18e+06		1948	4080000	4010000	3940000	3840000	1.04	1.2	1.39	0.43	4.06e+06		1948	3340000	3670000	3630000	3560000
1916					3496720			1916					3516000				1949	NaN	0.74	0.56	NaN		1949	4.14e+06	4.06e+06	4.02e+06	4120000	1.07	1.22	1.41	0.48	4.18e+06		1949	4.02e+06	4.06e+06	3860000	4.07e+06	1.01	1.22	1.37	0.47	4.07e+06		1949	3410000	3770000	3900000	3390000
1917					3412720			1917					3374000				1950	NaN	0.76	0.26	NaN		1950	4.14e+06	4.06e+06	4.02e+06	4120000	1.07	1.22	1.41	0.48	4.18e+06		1950	4040000	3960000	3940000	4120000	1.02	1.18	1.39	0.48	4.07e+06		1950	3570000	3330000	3780000	3340000
1918					3325910			1918					3227000				1951	NaN	0.67	0.32	NaN		1951	4.1e+06	4.06e+06	4.02e+06	4120000	1.05	1.22	1.41	0.48	4160000		1951	4040000	4010000	3980000	4.07e+06	1.02	1.2	1.4	0.47	4090000		1951	3170000	3550000	3670000	3390000
1919					3656320			1919					3786000				1952	NaN	NaN	0.29	0.31		1952	4.14e+06	4.06e+06	4.02e+06	4120000	1.07	1.22	1.41	0.48	4.18e+06		1952	3970000	4.06e+06	3940000	4010000	0.99	1.22	1.39	0.46	4.06e+06		1952	3240000	2840000	3160000	3340000
1920					3447720			1920					3433000				1953	NaN	0.85	0.48	NaN		1953	4.14e+06	4.06e+06	4.02e+06	4120000	1.07	1.22	1.41	0.48	4.18e+06		1953	4120000	3790000	3980000	4.07e+06	1.06	1.11	1.4	0.47	4040000		1953	3410000	2710000	2920000	3560000
1921					3674560			1921					3817000				1954	0.65	0.53	0.25	NaN		1954	4.14e+06	4.06e+06	3980000	4120000	1.07	1.22	1.4	0.48	4170000		1954	3740000	3910000	3980000	3960000	0.88	1.16	1.4	0.45	3890000		1954	3240000	3150000	3740000	3450000
1922					3233350			1922					3071000				1955	0.64	NaN	0.14	NaN		1955	4000000	4.06e+06	4.02e+06	4120000	1	1.22	1.41	0.48	4.11e+06		1955	3760000	4040000	3980000	4120000	0.89	1.21	1.4	0.48	3980000		1955	2860000	3350000	3590000	3730000
1923					3471610			1923					3474000				1956	0.55	0.49	0.34	0.36		1956	4120000	4.06e+06	4.02e+06	4120000	1.06	1.22	1.41	0.48	4170000		1956	4000000	4040000	3980000	4120000	1	1.21	1.4	0.48	4090000		1956	3510000	3550000	3390000	3680000
1924					3842720			1924					4101000				1957	0.86	0.59	0.28	0.26		1957	4.14e+06	4.06e+06	4.02e+06	4120000	1.07	1.22	1.41	0.48	4.18e+06		1957	3760000	4010000	3980000	4010000	0.89	1.2	1.4	0.46	3.95e+06		1957	3170000	3840000	3280000	3510000
1925					3763120			1925					3966000				1958	0.79	0.67	0.33	0.35		1958	4120000	4.06e+06	4.02e+06	4120000	1.06	1.22	1.41	0.48	4170000		1958	4120000	4040000	3980000	4.07e+06	1.06	1.21	1.4	0.47	4.14e+06		1958	3790000	3500000	3280000	3510000
1926					3739420			1926					3926000				1959	0.85	0.81	0.41	0.34		1959	4.14e+06	4.06e+06	4.02e+06	4120000	1.07	1.22	1.41	0.48	4.18e+06		1959	4080000	3990000	3980000	4.07e+06	1.04	1.19	1.4	0.47	4.1e+06		1959	3130000	2960000	3430000	3170000
1927					3749020			1927					3942000				1960	NaN	0.65	0.25	0.25		1960	4.14e+06	4.06e+06	4.02e+06	4120000	1.07	1.22	1.41	0.48	4.18e+06		1960	4080000	3960000	3980000	4.07e+06	1.04	1.18	1.4	0.47	4090000		1960	3410000	2790000	3160000	3340000
1928					4081720			1928					4505000				1961	0.73	0.76	0.3	0.35		1961	4.14e+06	4.06e+06	4.02e+06	4120000	1.07	1.22	1.41	0.48	4.18e+06		1961	4.02e+06	4010000	3980000	4010000	1.01	1.2	1.4	0.46	4.07e+06		1961	2980000	3060000	3710000	3450000
1929					3851320			1929					4115000				1962	1.01	1	0.44	NaN		1962	4.14e+06	4.06e+06	4.02e+06	4120000	1.07	1.22	1.41	0.48	4.18e+06		1962	3890000	4040000	3980000	3960000	0.95	1.21	1.4	0.45	4010000		1962	3430000	3960000	3780000	3340000
1930					3744620			1930					3935000				1963	1.12	0.95	0.54	0.56		1963	4.14e+06	4.06e+06	4.02e+06	4120000	1.07	1.22	1.41	0.48	4.18e+06		1963	4.06e+06	4.06e+06	4.02e+06	4.07e+06	1.03	1.22	1.41	0.47	4130000		1963	3550000	3820000	3740000	3340000
1931					3681320			1931					3828000				1964	0.89	0.81	0.44	0.38		1964	4120000	4.06e+06	3900000	4120000	1.06	1.22	1.38	0.48	4.14e+06		1964	4.1e+06	3990000	3940000	4.07e+06	1.05	1.19	1.39	0.47	4.1e+06		1964	3790000	3350000	3310000	3390000
1932					3268420			1932					3130000				1965	0.89	0.71	0.4	0.43		1965	4.14e+06	4.06e+06	4.02e+06	4120000	1.07	1.22	1.41	0.48	4.18e+06		1965	4120000	3940000	3980000	4120000	1.06	1.17	1.4	0.48	4.11e+06		1965	2980000	3030000	3900000	3620000
1933			3790000		3802120			1933			3788000		4048000				1966	1.14	1.12	0.52	0.6		1966	4.14e+06	4.06e+06	4.02e+06	4120000	1.07	1.22	1.41	0.48	4.18e+06		1966	4120000	4.06e+06	3980000	4.07e+06	1.06	1.22	1.4	0.47	4.15e+06		1966	3910000	3230000	3550000	3230000
1934			3970000		3566520			1934			3934000		3795000				1967	0.99	0.86	0.46	0.5		1967	4.14e+06	4.06e+06	4.02e+06	4120000	1.07	1.22	1.41	0.48	4.18e+06		1967	4080000	4010000	3980000	3840000	1.04	1.2	1.4	0.43	4.07e+06		1967	3530000	3400000	3670000	3340000
1935			3765000		3420520			1935			3767000		3638000				1968	0.87	0.98	0.52	0.71		1968	3970000	4.06e+06	4.02e+06	4120000	0.99	1.22	1.41	0.48	4.1e+06		1968	4.1e+06	3940000	3900000	3900000	1.05	1.17	1.38	0.44	4040000		1968	3700000	2540000	2570000	3000000
1936			3950000	4087000	3764420			1936			3918000	4454000	4008000				1969	0.99	1	0.56	0.46		1969	4120000	4.06e+06	4.02e+06	4120000	1.06	1.22	1.41	0.48	4170000		1969	4.1e+06	4010000	3940000	4.07e+06	1.05	1.2	1.39	0.47	4.11e+06		1969	3740000	3520000	3510000	3450000
1937			3820000	3830000	3258020			1937			3812000	4432000	3463000				1970	0.84	0.72	0.42	0.3		1970	4120000	4.06e+06	4.02e+06	4120000	1.06	1.22	1.41	0.48	4170000		1970	4120000	4040000	4.02e+06	4.07e+06	1.06	1.21	1.41	0.47	4.15e+06		1970	3550000	3350000	3590000	3450000
1938			3.8e+06		3211520			1938			3796000		3413000				1971	0.78	0.9	0.41	0.37		1971	4.14e+06	4.06e+06	3980000	4120000	1.07	1.22	1.4	0.48	4170000		1971	3890000	3990000	3980000	4.07e+06	0.95	1.19	1.4	0.47	4010000		1971	3300000	2910000	3430000	3560000
1939			3780000		3451920			1939			3780000		3672000				1972	0.89	0.74	0.27	NaN		1972	4.14e+06	4.06e+06	4.02e+06	4120000	1.07	1.22	1.41	0.48	4.18e+06		1972	4.02e+06	4040000	3980000	4010000	1.01	1.21	1.4	0.46	4080000		1972	3380000	3740000	3820000	3170000
1940	4120000	4.14e+06	3517000		3160920			1940	4459000	4459000	3566000		3359000				1973	0.81	0.68	0.3	0.44		1973	4.14e+06	4.06e+06	4.02e+06	4120000	1.07	1.22	1.41	0.48	4.18e+06		1973	4120000	3940000	3900000	4120000	1.06	1.17	1.38	0.48	4090000		1973	3620000	2660000	3510000	3620000
1941	4170000	4.02e+06	3.17e+06		3246220			1941	4459000	4458000	3284000		3450000				1974	0.79	1.08	0.35	0.37		1974	4.14e+06	4.06e+06	4.02e+06	4120000	1.07	1.22	1.41	0.48	4.18e+06		1974	4080000	3960000	3980000	4120000	1.04	1.18	1.4	0.48	4.1e+06		1974	3810000	3200000	3000000	3730000
1942	4140000	4.18e+06	3.52e+06		3444920			1942	4459000	4459000	3568000		3664000				1975	0.79	0.67	0.24	0.4		1975	4120000	4.06e+06	4.02e+06	4120000	1.06	1.22	1.41	0.48	4170000		1975	3660000	4010000	4.02e+06	4120000	0.84	1.2	1.41	0.48	3930000		1975	2960000	3350000	3900000	3840000
1943	4140000	4050000	2.93e+06	3580000	2975020	3675000		1943	4459000	4458000	3089000	4411000	3159000	4104000			1976	0.72	0.72	0.35	0.35		1976	4.14e+06	4.06e+06	4.02e+06	4120000	1.07	1.22	1.41	0.48	4.18e+06		1976	3950000	4010000	3980000	4120000	0.98	1.2	1.4	0.48	4.06e+06		1976	3280000	3400000	3430000	3620000
1944	3660000	4140000	3.61e+06	3910000	3345720	3830000		1944	4458000	4459000	3642000	4439000	3557000	4250000			1977	0.85	0.92	0.34	0.42		1977	4.14e+06	4.06e+06	4.02e+06	4120000	1.07	1.22	1.41	0.48	4.18e+06		1977	4.1e+06	3990000	3980000	4.07e+06	1.05	1.19	1.4	0.47	4.11e+06		1977	3490000	3570000	3240000	3620000
1945	4.1e+06	4080000	3.16e+06	2.91e+06	2887520	3563000		1945	4459000	4458000	3276000	4355000	3064000	4137000			1978	1.01	0.99	0.32	0.49		1978	4.14e+06	4.06e+06	4.02e+06	4120000	1.07	1.22	1.41	0.48	4.18e+06		1978	4080000	4040000	4.02e+06	4.07e+06	1.04	1.21	1.41	0.47	4130000		1978	3380000	3670000	3740000	3680000
1946	4170000	4.03e+06	3.57e+06	3820000	3495920	3898000		1946	4459000	4458000	3609000	4431000	3719000	4239000			1979	1.1	1.08	0.31	0.53		1979	4.14e+06	4.06e+06	4.02e+06	4120000	1.07	1.22	1.41	0.48	4.18e+06		1979	4.06e+06	4010000	4.02e+06	4010000	1.03	1.2	1.41	0.46	4.1e+06		1979	3280000	3790000	3860000	3170000
1947	4.18e+06	3810000	3.31e+06	3700000	3279820	3750000		1947	4459000	4456000	3398000	4421000	3486000	4184000			1980	0.87	0.81	NaN	NaN		1980	4.14e+06	4.06e+06	4.02e+06	4120000	1.07	1.22	1.41	0.48	4.18e+06		1980	3890000	4010000	3980000	4120000	0.95	1.2	1.4	0.48	4.03e+06		1980	3910000	3570000	3630000	3840000
1948	4.18e+06	4.06e+06	3440000	3780000	3473260	3865000		1948	4459000	4458000	3504000	4428000	3695000	4212000			1981	1.1	1.01	0.47	NaN		1981	4.14e+06	4.06e+06	4.02e+06	4120000	1.07	1.22	1.41	0.48	4.18e+06		1981	4120000	4010000	3980000	4.07e+06	1.06	1.2	1.4	0.47	4130000		1981	3680000	3500000	3430000	3560000
1949	4.18e+06	4.07e+06	3.55e+06	3970000	3626320	3943000		1949	4459000	4458000	3593000	4444000	3859000	4239000			1982	0.93	0.88	NaN	NaN		1982	4.14e+06	4.06e+06	4.02e+06	4120000	1.07	1.22	1.41	0.48	4.18e+06		1982	4.02e+06	4040000	3980000	4010000	1.01	1.21	1.4	0.46	4080000		1982	3550000	3400000	3740000	3450000
1950	4.18e+06	4.07e+06	3410000	3910000	3218720	3893000		1950	4459000	4458000	3479000	4439000	3421000	4209000			1983	0.83	0.87	NaN	NaN		1983	4.14e+06	4.06e+06	4.02e+06	4120000	1.07	1.22	1.41	0.48	4.18e+06		1983	4120000	4040000	4.02e+06	4120000	1.06	1.21	1.41	0.48	4160000		1983	3450000	3350000	3670000	3560000
1951	4160000	4090000	3.29e+06	3.67e+06	3173820	3803000		1951	4459000	4458000	3382000	4419000	3372000	4180000			1984	0.77	0.74	0.35	0.49		1984	4120000	4.06e+06	4.02e+06	4120000	1.06	1.22	1.41	0.48	4170000		1984	4.06e+06	4.06e+06	3980000	4.07e+06	1.03	1.22	1.4	0.47	4120000		1984	3220000	3790000	3820000	3390000
1952	4.18e+06	4.06e+06	2.89e+06	3187000	3203020	3579000		1952	4459000	4458000	3057000	4379000	3404000	4088000			1985	0.53	0.77	0.23	0.63		1985	4.1e+06	4.06e+06	3980000	4120000	1.05	1.22	1.4	0.48	4.15e+06		1985	4.02e+06	4.06e+06	4.02e+06	4120000	1.01	1.22	1.41	0.48	4.12e+06		1985	3190000	3640000	3740000	3510000
1953	4.18e+06	4040000	2900000	3.69e+06	3010020	3703000		1953	4459000	4458000	3375000	4440000	3350000	4183000			1986	0.89	0.87	0.46	0.67		1986	4120000	4.06e+06	4.02e+06	4120000	1.06	1.22	1.41	0.48	4170000		1986	4120000	4.06e+06	3980000	4.07e+06	1.06	1.22	1.4	0.47	4.15e+06		1986	3660000	3670000	3820000	3280000
1954	4170000	3890000	3190000	3740000	3273820	3748000		1954	4459000	4457000	3595000	4449000	3536000	4240000			1987	0.9	0.91	0.49	0.67		1987	4.14e+06	4.06e+06	4.02e+06	4120000	1.07	1.22	1.41	0.48	4.18e+06		1987	4.06e+06	4.06e+06	4.02e+06	4120000	1.03	1.22	1.41	0.48	4.14e+06		1987	3360000	3720000	3670000	3340000
1955	4.11e+06	3980000	3.1e+06	3.88e+06	3257120	3768000		1955	4459000	4457000	3527000	4473000	3524000	4229000			1988	0.9	0.86	0.54	0.84		1988	4120000	4.06e+06	3980000	4120000	1.06	1.22	1.4	0.48	4160000		1988	4040000	4040000	4.02e+06	4120000	1.02	1.21	1.41	0.48	4.12e+06		1988	3600000	3770000	3670000	3620000
1956	4170000	4090000	3430000	3940000	3560420	3908000		1956	4459000	4458000	3778000	4483000	3737000	4295000			1989	0.91	0.84	0.59	0.74		1989	4120000	4.06e+06	3980000	4120000	1.06	1.22	1.4	0.48	4160000		1989	4.1e+06	4040000	3980000	4.07e+06	1.05	1.21	1.4	0.47	4130000		1989	3660000	3640000	2960000	3280000
1957	4.18e+06	3.95e+06	3330000	3670000	3489620	3783000		1957	4459000	4457000	3702000	4437000	3688000	4264000			1990	0.66	0.72	0.38	0.63		1990	4.1e+06	4.06e+06	4.02e+06	4120000	1.05	1.22	1.41	0.48	4160000		1990	4.06e+06	3960000	3670000	4.07e+06	1.03	1.18	1.32	0.47	4000000		1990	3570000	3300000	2100000	3340000
1958	4170000	4.14e+06	3.48e+06	3.78e+06	3565420	3893000		1958	4459000	4459000	3816000	4456000	3741000	4298000			1991	0.79	0.7	0.45	0.68		1991	4000000	4.06e+06	4.02e+06		1	1.22	1.41		4027000		1991	4000000	4040000	3940000	4.07e+06	1	1.21	1.39	0.47	4.07e+06		1991	3600000	3450000	3120000	3560000
1959	4.18e+06	4.1e+06	2930000	3360000	3054620	3643000		1959	4459000	4458000	3398000	4384000	3381000	4175000			1992	0.71	0.63	0.52	0.65		1992	4.14e+06				1.07				4140000		1992	3760000				0.89				3760000		1992	3130000		3630000	3450000
1960	4.18e+06	4090000	2.95e+06	3570000	3038120	3698000		1960	4459000	4458000	3413000	4420000	3369000	4188000			1993	NaN	NaN	NaN	NaN		1993											1993											1993
1961	4.18e+06	4.07e+06	3020000	3850000	3148720	3780000		1961	4459000	4458000	3466000	4468000	3447000	4213000			1994	NaN	NaN	NaN	NaN		1994											1994											1994
1962	4.18e+06	4010000	3.6e+06	3.9e+06	3708220	3923000		1962	4459000	4458000	3907000	4476000	3842000	4325000			1995	NaN	NaN	NaN	NaN		1995											1995											1995
1963	4.18e+06	4130000	3590000	3.83e+06	3817920	3933000		1963	4459000	4459000	3899000	4464000	3919000	4320000			1996	NaN	NaN	NaN	NaN		1996											1996											1996
1964	4.14e+06	4.1e+06	3410000	3703000	3482720	3838000		1964	4459000	4458000	3763000	4442000	3683000	4281000			1997	0.9	0.88	0.47	0.66		1997	4120000	4.06e+06	4.02e+06	4120000	1.06	1.22	1.41	0.48	4170000		1997	3850000	4010000	4.02e+06	3960000	0.93	1.2	1.41	0.45	3990000		1997	2920000	3330000	3670000	3000000
1965	4.18e+06	4.11e+06	3.09e+06	3.25e+06	3373320	3658000		1965	4459000	4458000	3520000	4365000	3606000	4201000			1998	1.05	1.06	0.47	0.63		1998	4.14e+06	4.06e+06	4.02e+06	4120000	1.07	1.22	1.41	0.48	4.18e+06		1998	4120000	4.06e+06	3980000	4120000	1.06	1.22	1.4	0.48	4160000		1998	3470000	3590000	3780000	3390000
1966	4.18e+06	4.15e+06	3.45e+06	4040000	3844820	3955000		1966	4459000	4459000	3793000	4500000	3938000	4303000			1999	0.88	0.95	0.37	0.64		1999	4.14e+06	4.06e+06	4.02e+06	4120000	1.07	1.22	1.41	0.48	4.18e+06		1999	4.1e+06	4040000	4.02e+06	4120000	1.05	1.21	1.41	0.48	4.15e+06		1999	3430000	2960000	3390000	3230000
1967	4.18e+06	4.07e+06	3.39e+06	3.55e+06	3620620	3798000		1967	4459000	4458000	3747000	4416000	3780000	4270000			2000	0.72	0.73	0.4	0.48		2000	4.14e+06	4.06e+06	4.02e+06	4120000	1.07	1.22	1.41	0.48	4.18e+06		2000	3950000	3990000	3980000	4120000	0.98	1.19	1.4	0.48	4050000		2000	3070000	2910000	3390000	3510000
1968	4.1e+06	4040000	2.78e+06	3510000	3002720	3608000		1968	4458000	4458000	3284000	4409000	3344000	4152000			2001	0.7	0.71	0.31	0.56		2001	4000000	4.06e+06	4.02e+06	4120000	1	1.22	1.41	0.48	4.11e+06		2001	3910000	4040000	3980000	4010000	0.96	1.21	1.4	0.46	4.03e+06		2001	3090000	3590000	3670000	3280000
1969	4170000	4.11e+06	3520000	3.86e+06	3694320	3915000		1969	4459000	4458000	3846000	4469000	3832000	4308000			2002	0.72	0.7	0.39	0.66		2002	4120000	4.06e+06	4.02e+06	4120000	1.06	1.22	1.41	0.48	4170000		2002	4040000	4010000	3940000	3960000	1.02	1.2	1.39	0.45	4.06e+06		2002	3320000	3230000	2880000	3280000
1970	4170000	4.15e+06	3.38e+06	3680000	3608720	3845000		1970	4459000	4459000	3740000	4439000	3772000	4274000			2003	0.96	0.93	0.49	0.65		2003	4.14e+06	4.06e+06	4.02e+06	4120000	1.07	1.22	1.41	0.48	4.18e+06		2003	4.1e+06	4010000	3980000	3960000	1.05	1.2	1.4	0.45	4.1e+06		2003	3600000	3180000	2570000	3060000
1971	4170000	4010000	3.06e+06	3.72e+06	3337820	3740000		1971	4459000	4458000	3497000	4445000	3581000	4215000			2004	0.91	0.71	0.33	0.54		2004	4.14e+06	4.06e+06	4.02e+06	4120000	1.07	1.22	1.41	0.48	4.18e+06		2004	3970000	4.06e+06	3980000	4.07e+06	0.99	1.22	1.4	0.47	4080000		2004	3030000	3670000	3430000	3170000
1972	4.18e+06	4080000	3470000	3630000	3662920	3840000		1972	4459000	4458000	3755000	4411000	3827000	4271000			2005	0.68	0.68	0.35	0.53		2005	4040000	4.06e+06	4.02e+06	4120000	1.02	1.22	1.41	0.48	4.13e+06		2005	3930000	3940000	3940000	4010000	0.97	1.17	1.39	0.46	3.99e+06		2005	2920000	2660000	2530000	2940000
1973	4.18e+06	4090000	3140000	3770000	3140420	3795000		1973	4459000	4458000	3398000	4442000	3436000	4189000			2006	0.6	0.41	0.3	0.46		2006	3970000	4.06e+06	3980000	4120000	0.99	1.22	1.4	0.48	4090000		2006	3810000	4040000	3980000	4010000	0.91	1.21	1.4	0.46	3980000		2006	3070000	2880000	2530000	3230000
1974	4.18e+06	4.1e+06	3340000	3657000	3441520	3819000		1974	4459000	4458000	3614000	4417000	3661000	4237000
1975	4170000	3930000	3250000	3850000	3484020	3800000		1975	4459000	4457000	3517000	4459000	3693000	4223000
1976	4.18e+06	4.06e+06	3260000	3.93e+06	3351620	3858000		1976	4459000	4458000	3528000	4477000	3594000	4231000
1977	4.18e+06	4.11e+06	3.38e+06	3980000	3134920	3913000		1977	4459000	4458000	3658000	4488000	3432000	4266000										4.10952e+06	4060000	4.0131e+06	4120000	1.06	1.22	1.41	0.48	4.17			4.01143e+06	4.00623e+06	3.9723e+06	4050000	1.01	1.2	1.4	0.47	4.06714e+06			3.41771e+06	3.37692e+06	3.50588e+06	3.46818e+06
1978	4.18e+06	4130000	3510000	3990000	3398020	3953000		1978	4459000	4458000	3798000	4490000	3629000	4301000
1979	4.18e+06	4.1e+06	3450000	3.95e+06	3607220	3920000		1979	4459000	4458000	3602000	4435000	3752000	4239000
1980	4.18e+06	4.03e+06	3720000	4090000	3596420	4005000		1980	4459000	4458000	4094000	4470000	3743000	4370000										Kara	Laptev	E. Siberian	W. Chukchi								Kara	Laptev	E. Siberian	W. Chukchi								Kara	Laptev	E. Siberian	W. Chukchi
1981	4.18e+06	4130000	3.48e+06	4.03e+06	3576120	3955000		1981	4459000	4458000	3657000	4455000	3725000	4257000										2.11	2.45	3.91	5.62							m=	2.11	2.45	3.91	5.62								2.11	2.45	3.91	5.62
1982	4.18e+06	4080000	3440000	3990000	3563920	3923000		1982	4459000	4458000	3584000	4445000	3714000	4237000										1.886	1.071	-1.495	1.427							c=	1.886	1.071	-1.495	1.427								1.886	1.071	-1.495	1.427
1983	4.18e+06	4160000	3370000	4.07e+06	3410620	3945000		1983	4459000	4458000	3457000	4465000	3580000	4210000
1984	4170000	4120000	3.45e+06	3.94e+06	3597320	3920000		1984	4459000	4458000	3602000	4433000	3744000	4238000
1985	4.15e+06	4.12e+06	3380000	4010000	3392920	3915000		1985	4459000	4458000	3475000	4450000	3565000	4211000
1986	4170000	4.15e+06	3590000	3880000	3619020	3948000		1986	4459000	4458000	3857000	4418000	3763000	4298000
1987	4.18e+06	4.14e+06	3440000	4010000	3503520	3943000		1987	4459000	4458000	3584000	4450000	3661000	4238000
1988	4160000	4.12e+06	3.62e+06	4.1e+06	3448020	4000000		1988	4459000	4458000	3912000	4472000	3613000	4325000
1989	4160000	4130000	3.36e+06	3790000	3400920	3860000		1989	4459000	4458000	3438000	4396000	3572000	4188000
1990	4160000	4000000	2.97e+06	3700000	2635520	3708000		1990	4459000	4458000	2728000	4374000	2902000	4005000
1991	4027000	4.07e+06	3340000	3690000	3164120	3782000		1991	4459000	4458000	3402000	4372000	3365000	4173000
1992	4140000	3760000	3403000	3905000	3173920	3802000		1992	4459000	4456000	3517000	4424000	3373000	4214000
1993					3300120			1993					3484000
1994					3283820			1994					3469000
1995					2607020			1995					2877000
1996					3672320			1996					3809000
1997	4170000	3990000	3.01e+06	3940000	3097320	3778000		1997	4459000	4456000	3249000	4440000	3306000	4151000
1998	4.18e+06	4160000	3480000	4.07e+06	3702820	3973000		1998	4459000	4458000	3645000	4462000	3836000	4256000
1999	4.18e+06	4.15e+06	3070000	4040000	3301620	3860000		1999	4459000	4458000	3299000	4457000	3485000	4168000
2000	4.18e+06	4050000	2930000	3800000	2976220	3740000		2000	4459000	4457000	3181000	4417000	3200000	4129000
2001	4.11e+06	4.03e+06	3250000	3960000	3315400	3838000		2001	4459000	4457000	3451000	4444000	3497000	4203000
2002	4170000	4.06e+06	3010000	4040000	2932200	3820000		2002	4459000	4457000	3249000	4457000	3162000	4156000
2003	4.18e+06	4.1e+06	3000000	3770000	3091660	3763000		2003	4459000	4457000	3240000	4412000	3301000	4142000
2004	4.18e+06	4080000	3.17e+06	3800000	3303270	3808000		2004	4459000	4457000	3383000	4417000	3486000	4179000
2005	4.13e+06	3.99e+06	2440000	3450000	2572720	3503000		2005	4459000	4456000	2768000	4358000	2847000	4010000
2006	4090000	3980000	2650000	3560000	2660720	3570000		2006	4459000	4456000	2945000	4377000	2924000	4059000
2007					2331720			2007					2637000
2008					2875720			2008					3112000
2009								2009
2010				3.75344e+06				2010
2011								2011
2012								2012
2013								2013
2014								2014
2015								2015
Mahoney dataset (pre-calibration)								T-based proxy (unadj)
Siberian, sea ice extent (million km2)								Siberian, sea ice extent (million km2)
Means	Winter	Spring	Summer	Autumn	Frolov	Annual		Means	Winter	Spring	Summer	Autumn	Frolov	Annual
1900-1932			3563000		3563000			1900-1932	4459000	4458000	3628000	4441000	3628000	4247000
1933-1952	4120000	4062000	3512000	3696000	3350000	3780000		1933-1952	4459000	4458000	3562000	4421000	3562000	4225000
1953-1971	4167000	4065000	3242000	3712000	3415000	3797000		1953-1971	4459000	4458000	3635000	4444000	3635000	4249000
1972-1978	4179000	4071000	3336000	3830000	3373000	3854000		1972-1978	4459000	4458000	3610000	4455000	3610000	4245000
1979-1992	4158000	4079000	3430000	3940000	3224000	3902000		1979-1992	4459000	4458000	3566000	4433000	3417000	4229000
1997-2006	4157000	4059000	3001000	3843000		3765000		1997-2006	4459000	4457000	3241000	4424000	^ 1979-2008	4145000
Std. Dev.	Winter	Spring	Summer	Autumn	Summer	Annual		Std. Dev.	Winter	Spring	Summer	Autumn	Frolov	Annual
1900-1932			222000		222000			1900-1932	200	600	375200	42400	375200	99400
1933-1952	141000	88000	314000	337000	237000	135000		1933-1952	200	600	255000	28100	255000	63800
1953-1971	24000	71000	256000	199000	276000	106000		1953-1971	200	600	194500	34200	194500	54000
1972-1978	4000	66000	130000	148000	188000	59000		1972-1978	100	400	140600	32200	140600	33800
1979-1992	40000	102000	171000	134000	375000	85000		1979-1992	100	600	311500	32900	328000	81900
1997-2006	34000	64000	292000	210000		137000		1997-2006	100	600	246000	35100	^ 1979-2008	67600
								T-based proxy
0	1939.5	1932.5	1932.5	1935.5				Siberian, sea ice extent (million km2)
10000000	1939.5	1932.5	1932.5	1935.5				Means	Winter	Spring	Summer	Autumn	Autumn	Annual
0	1952.5	1952.5	1952.5	1952.5				1901-1939	4459000	4458000	3608000	4435000	4435000	4240000
10000000	1952.5	1952.5	1952.5	1952.5				1940-1945	4459000	4457000	3426000	4426000	4426000	4192000
0	1971.5	1971.5	1971.5	1971.5				1946-1952	4459000	4458000	3696000	4430000	4430000	4261000
10000000	1971.5	1971.5	1971.5	1971.5				1953-1971	4459000	4458000	3635000	4444000	4444000	4249000
0	1978.5	1978.5	1978.5	1978.5				1972-1978	4459000	4458000	3610000	4455000	4455000	4245000
10000000	1978.5	1978.5	1978.5	1978.5				1979-2005	4459000	4458000	3458000	4428000	4428000	4201000
0	1992.2	1992.2	1992.2	1992.2
10000000	1992.2	1992.2	1992.2	1992.2				Std. Dev.	Winter	Spring	Summer	Autumn	Autumn	Annual
0	1996.8	1996.8	1996.8	1996.8				1901-1939	200	600	359100	41900	41900	94900
10000000	1996.8	1996.8	1996.8	1996.8				1940-1945	200	700	137600	25500	25500	34700
0								1946-1952	100	600	290600	33300	33300	72100
10000000								1953-1971	200	600	194500	34200	34200	54000
								1972-1978	100	400	140600	32200	32200	33800
								1979-2005	100	600	322200	34400	34400	85000
	Pre-satellite era (1940s-1978)				Pre-satellite era (1940s-1978)
	Winter Siberian (AARI, 1940-1978)				Winter Siberian (AARI, 1940-1978)
	Unadjusted	Unadjusted			MW09-adjusted	MW09-adjusted
slope	-10746	4.15187e+06			-9740.12	4.15105e+06
+/-	8702.31	13459.1			8722.38	13610.4
r2	0.0395805	83726.9			0.0326033	84030.5
F	1.52483	37			1.24698	37
regression ss	1.06894e+10	2.59377e+11			8.80507e+09	2.61262e+11
p	0.224674				0.27133
	Spring Siberian (AARI, 1940-1978)				Spring Siberian (AARI, 1940-1978)
	Unadjusted	Unadjusted			MW09-adjusted
slope	-29080.4	4.07317e+06			-29672.5	4.07041e+06
+/-	11141.9	11557.8			11603.6	11355.1
r2	0.155485	69393.3			0.15019	69610.5
F	6.81214	37			6.53914	37
regression ss	3.28034e+10	1.78171e+11			3.16862e+10	1.79288e+11
p	0.0129934				0.0147862
	Summer Siberian (Frolov, 1900-1978)				Summer Siberian (Frolov, 1900-1978)
	Unadjusted	Unadjusted			MW09-adjusted
slope	-96573.3	3.45457e+06			-113077	3.44434e+06
+/-	46112.8	27445.6			50305	27640.9
r2	0.0538917	243909			0.0615792	242916
F	4.38603	77			5.05274	77
regression ss	2.60932e+11	4.58086e+12			2.98154e+11	4.54364e+12
p	0.0395245				0.0274486
	Autumn Siberian (AARI, 1943-1978)				Autumn Siberian (AARI, 1943-1978)
	Unadjusted	Unadjusted			MW09-adjusted
slope	15550.7	3.7151e+06			16945	3.71622e+06
+/-	28208.3	40651.6			28993.7	40620.3
r2	0.00885929	243808			0.00994611	243674
F	0.303908	34			0.341565	34
regression ss	1.8065e+10	2.02103e+12			2.02811e+10	2.01882e+12
p	0.585047				0.562786
	Annual Siberian (AARI, 1940-1978)				Annual Siberian (AARI, 1940-1978)
	Unadjusted	Unadjusted			MW09-adjusted
slope	-30517.1	3.80487e+06			-30052.7	3.80265e+06
+/-	23822.4	17957.8			24918.6	17960.6
r2	0.0460432	107451			0.0410249	107733
F	1.64103	34			1.45452	34
regression ss	1.89467e+10	3.92552e+11			1.68817e+10	3.94617e+11
p	0.208854				0.23613
[truncated: 15 more columns]

[truncated: 10 more sheets: 10 AARI look-up table, 11 Siberian - rescaled (AARI), 12 N. American temperatures, 13 Nordic temperatures, 14 Siberian temperatures, 15 N. American - T-based, 16 Nordic - T-based, 17 Siberian - T-based, 18 Other summer reconstructions, 19 means & SDs]
